# Supplementary material for: Degradation Dynamics and Residue Analysis of Four Propiconazole Stereoisomers in “Fengtang” Plum during Storage by LC-MS/MS
Source: MDPI journal article supplement (doi:10.3390/foods12112200), 2023-05-30
Supplement: s1 [file s1]

## SUPPORTTING INFORMATION

### Degradation Dynamics and Residue Analysis of Four Propiconazole Stereoisomers in “Fengtang” Plum during Storage by LC-MS/MS

Pengyu Deng<sup>1</sup>, Lianhong Mou <sup>1</sup>, Guipeng Ou <sup>1</sup>, Xin Luo <sup>1</sup>, Deyu Hu <sup>1</sup>, Yuping Zhang <sup>1\*</sup>

<sup>1</sup> National Key Laboratory of Green Pesticide, Key Laboratory of Green Pesticide and Agricultural Bioengineering, Ministry of Education, Center for R&D of Fine Chemicals of Guizhou University, Guiyang 550025, China

\* Correspondence: zhangyupinggz@163.com; Tel.: (+86)851 88292090

**Table S1.** The parameters of the instruments for propiconazole

| Parameter Name         | Information       |
|------------------------|-------------------|
| Ion source             | ESI               |
| Quantitative ion pair  | 342.0/159.1 m/z   |
| Qualitative ion pair   | 342.0/69.1 m/z    |
| Column temperature     | 35°C              |
| Ion source temperature | 500°C             |
| Ion sprayer voltage    | 5500 V            |
| Ion source gas (GS1)   | 55.0 psi          |
| Ion source gas (GS2)   | 55.0 psi          |
| Curtain Gas            | 35.0 psi          |
| Scan mode              | Positive          |
| Scan patterns          | Multiple-scanning |

**Table S2.** Recovery rates and relative standard deviations of propiconazole enantiomers in “March” and “Carmine” plum

| Plum variety | Analytes               | Add level<br>(mg/kg) <sup>a</sup> | Recovery rate (%) |        |       |        |       | Average | RSD<br>(%, n = 5) |
|--------------|------------------------|-----------------------------------|-------------------|--------|-------|--------|-------|---------|-------------------|
|              |                        |                                   | 1                 | 2      | 3     | 4      | 5     |         |                   |
| March plum   | (2R,4R)-propiconazole  | 0.02                              | 94.08             | 101.56 | 87.85 | 84.74  | 84.11 | 90.47   | 7.35              |
|              |                        | 0.20                              | 98.96             | 98.96  | 88.31 | 87.06  | 89.56 | 92.57   | 5.90              |
|              |                        | 2.00                              | 96.57             | 98.86  | 97.14 | 93.14  | 88.57 | 94.86   | 4.08              |
|              | (2R,4S)-propiconazole  | 0.02                              | 93.24             | 95.37  | 91.81 | 96.09  | 98.93 | 95.09   | 2.74              |
|              |                        | 0.20                              | 102.7             | 102.0  | 96.03 | 94.54  | 99.01 | 98.86   | 3.59              |
|              |                        | 2.00                              | 96.53             | 102.8  | 100.3 | 90.22  | 88.96 | 95.77   | 6.09              |
|              | (2S,4S)-propiconazole  | 0.02                              | 86.21             | 87.59  | 81.38 | 82.76  | 91.03 | 85.79   | 3.86              |
|              |                        | 0.20                              | 94.35             | 94.35  | 99.19 | 103.2  | 100.0 | 98.23   | 3.84              |
|              |                        | 2.00                              | 96.40             | 105.0  | 104.3 | 91.37  | 93.53 | 98.13   | 6.24              |
|              | (2S,4R)- propiconazole | 0.02                              | 92.50             | 95.63  | 78.13 | 91.88  | 86.88 | 89.00   | 6.84              |
|              |                        | 0.20                              | 96.53             | 93.06  | 93.06 | 83.33  | 92.36 | 91.67   | 4.93              |
|              |                        | 2.00                              | 96.30             | 103.1  | 103.7 | 94.44  | 91.98 | 97.90   | 5.25              |
| Carmine plum | (2R,4R)-propiconazole  | 0.02                              | 84.98             | 83.50  | 92.36 | 96.06  | 93.84 | 90.15   | 5.58              |
|              |                        | 0.20                              | 92.65             | 102.94 | 87.50 | 105.15 | 96.32 | 96.91   | 7.27              |
|              |                        | 2.00                              | 101.9             | 103.4  | 105.6 | 100.0  | 94.97 | 101.1   | 4.01              |
|              | (2R,4S)-propiconazole  | 0.02                              | 90.28             | 88.19  | 81.94 | 97.22  | 98.61 | 91.25   | 6.83              |
|              |                        | 0.20                              | 85.99             | 94.27  | 105.1 | 106.4  | 100.0 | 98.34   | 8.40              |
|              |                        | 2.00                              | 93.60             | 101.2  | 98.84 | 100.0  | 97.09 | 98.14   | 2.95              |
|              | (2S,4S)-propiconazole  | 0.02                              | 91.60             | 94.66  | 88.55 | 90.84  | 82.44 | 89.62   | 4.57              |
|              |                        | 0.20                              | 83.69             | 91.49  | 99.29 | 97.87  | 86.52 | 91.77   | 6.83              |
|              |                        | 2.00                              | 102.0             | 101.9  | 102.6 | 95.42  | 94.77 | 99.35   | 3.89              |
|              | (2S,4R)-propiconazole  | 0.02                              | 91.41             | 90.18  | 100.6 | 97.55  | 83.44 | 92.64   | 6.71              |
|              |                        | 0.20                              | 88.89             | 99.31  | 104.9 | 102.1  | 95.83 | 98.19   | 6.18              |
|              |                        | 2.00                              | 100.6             | 96.63  | 103.4 | 101.1  | 98.31 | 100.0   | 2.60              |

<sup>a</sup> The sum of (2R,2R)-propiconazole, (2R,4S)-propiconazole, (2S,4S)-propiconazole, and (2S,4R)-propiconazole.

Figure Caption  
Figure\_1\_SuppInfo.

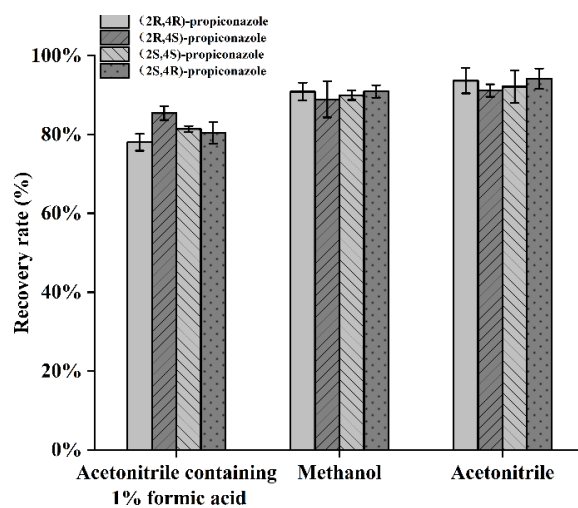

**Figure S1** Effects of different extractants on recoveries of propiconazole stereoisomers

Figure Caption  
Figure\_2\_SuppInfo.

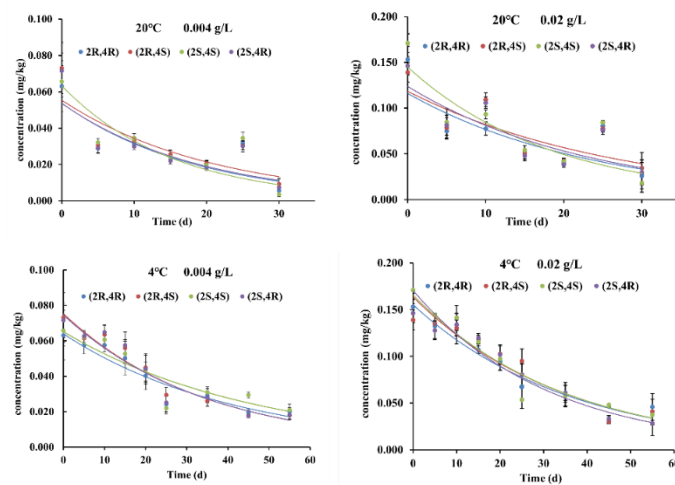

Figure S2. Digestion dynamics curves of propiconazole stereoisomers in plums at 4 and 20 °C

Figure Caption  
Figure\_3\_SuppInfo.

|                           |                          |                          |                                      |
|---------------------------|--------------------------|--------------------------|--------------------------------------|
| <b>Data File</b>          | 20220822 BHZ-YP-4du.wiff | <b>Result Table</b>      | 4-0.004-0d-1.rdb                     |
| <b>Acquisition Date</b>   | 8/23/2022 5:22:46 AM     | <b>Algorithm Used</b>    | MQL                                  |
| <b>Acquisition Method</b> | BHZ method.dam           | <b>Instrument Name</b>   | AB SCIEX Triple Quad 4500            |
| <b>Project</b>            | DPY                      | <b>Processing Method</b> | <i>No data for Processing Method</i> |

Sample Name:

0.004-0d-1

Vial #:

26

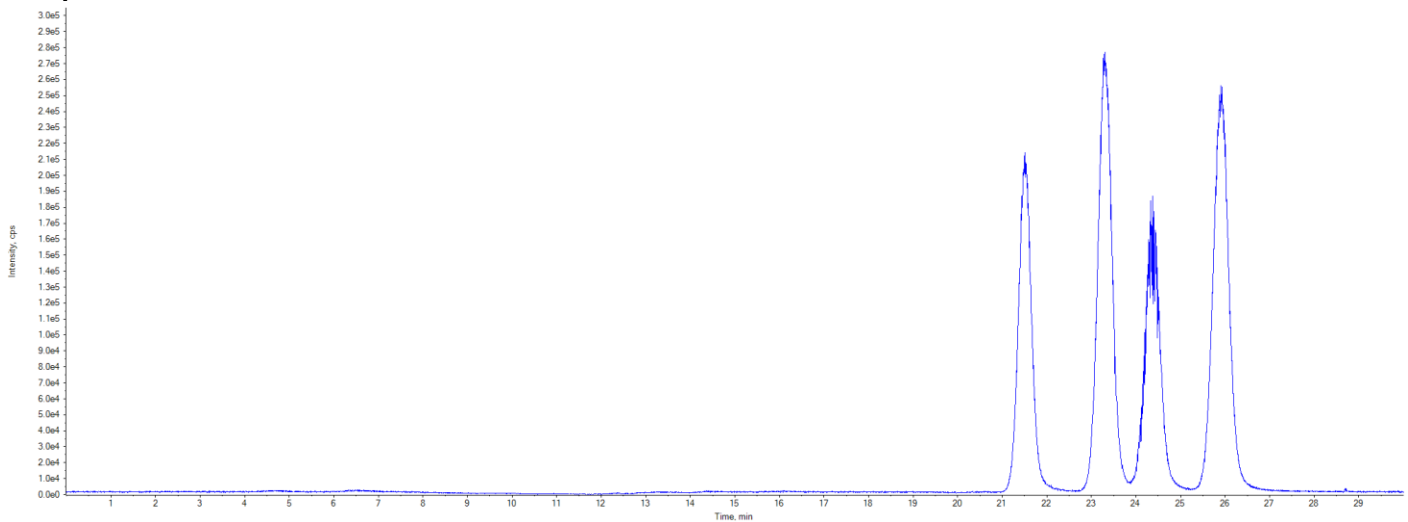

|                           |                                   |                         |                  |
|---------------------------|-----------------------------------|-------------------------|------------------|
| <b>Sample Name</b>        | 0.004-0d-1                        | <b>Injection Vial</b>   | 26               |
| <b>Data File</b>          | 20220822 BHZ-YP-4du.wiff          | <b>Injection Volume</b> | 10               |
| <b>Acquisition Date</b>   | 8/23/2022 5:22:46 AM              | <b>Algorithm Used</b>   | MQL              |
| <b>Acquisition Method</b> | BHZ method.dam                    | <b>Sample Type</b>      | Unknown          |
| <b>Instrument Name</b>    | AB SCIEX Triple Quad 4500         | <b>Result Table</b>     | 4-0.004-0d-1.rdb |
| <b>Sample ID</b>          | <i>No data for Sample ID</i>      | <b>Dilution Factor</b>  | 1.00             |
| <b>Sample Comment</b>     | <i>No data for Sample Comment</i> | <b>Weight to Volume</b> | 0.00             |

Approved By (Date and Initials):\_\_\_\_\_.

|  |                       |                                                         |
|--|-----------------------|---------------------------------------------------------|
|  | <b>Compound Name:</b> | F1 (342.000/159.100 Da)                                 |
|  | Expected RT:          | 21.5                                                    |
|  | Actual RT:            | 21.5                                                    |
|  | Equation:             | At least 2 points are required to calculate regression. |
|  | Area Counts:          | 3.56e+006                                               |
|  | ISTD Area Counts:     | N/A                                                     |
|  | Amount:               | 0.00 (ng/mL)                                            |

|                                                                                  |                       |                                                         |
|----------------------------------------------------------------------------------|-----------------------|---------------------------------------------------------|
| 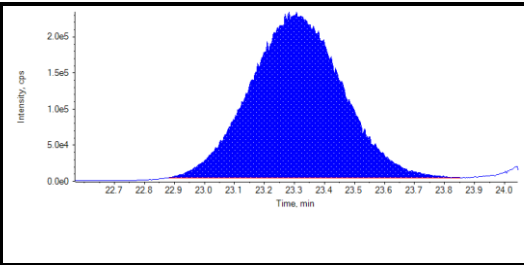 | <b>Compound Name:</b> | <b>F2 (342.000/159.100 Da)</b>                          |
|                                                                                  | Expected RT:          | 23.3                                                    |
|                                                                                  | Actual RT:            | 23.3                                                    |
|                                                                                  | Equation:             | At least 2 points are required to calculate regression. |
|                                                                                  | Area Counts:          | 5.00e+006                                               |
|                                                                                  | ISTD Area Counts:     | N/A                                                     |
|  | <b>Compound Name:</b> | <b>F3 (342.000/159.100 Da)</b>                          |
|                                                                                  | Expected RT:          | 24.4                                                    |
|                                                                                  | Actual RT:            | 24.4                                                    |
|                                                                                  | Equation:             | At least 2 points are required to calculate regression. |
|                                                                                  | Area Counts:          | 3.10e+006                                               |
|                                                                                  | ISTD Area Counts:     | N/A                                                     |
|  | <b>Compound Name:</b> | <b>F4 (342.000/159.100 Da)</b>                          |
|                                                                                  | Expected RT:          | 25.9                                                    |
|                                                                                  | Actual RT:            | 25.9                                                    |
|                                                                                  | Equation:             | At least 2 points are required to calculate regression. |
|                                                                                  | Area Counts:          | 5.22e+006                                               |
|                                                                                  | ISTD Area Counts:     | N/A                                                     |
|                                                                                  | Amount:               | 0.00 (ng/mL)                                            |
|                                                                                  |                       |                                                         |
|                                                                                  |                       |                                                         |
|                                                                                  |                       |                                                         |
|                                                                                  |                       |                                                         |
|                                                                                  |                       |                                                         |

Figure S3 The LC chromatogram of plums treated with 0.004 a.i. g/L propiconazole at 0 d

Figure Caption  
Figure\_4\_SuppInfo.

|                           |                          |                          |                                      |
|---------------------------|--------------------------|--------------------------|--------------------------------------|
| <b>Data File</b>          | 20220822 BHZ-YP-4du.wiff | <b>Result Table</b>      | 4-0.02-0d-3.rdb                      |
| <b>Acquisition Date</b>   | 8/22/2022 5:50:38 PM     | <b>Algorithm Used</b>    | MQL                                  |
| <b>Acquisition Method</b> | BHZ method.dam           | <b>Instrument Name</b>   | AB SCIEX Triple Quad 4500            |
| <b>Project</b>            | DPY                      | <b>Processing Method</b> | <i>No data for Processing Method</i> |

Sample Name: 0.02-0d-3 Vial #: 4

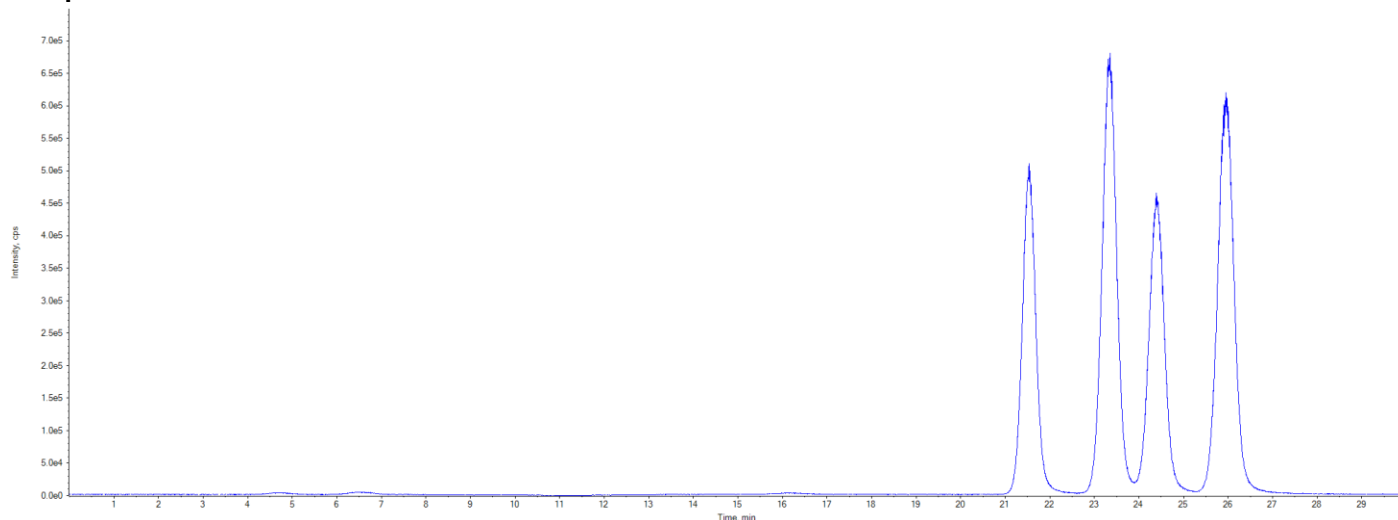

|                           |                                   |                         |                 |
|---------------------------|-----------------------------------|-------------------------|-----------------|
| <b>Sample Name</b>        | 0.02-0d-3                         | <b>Injection Vial</b>   | 4               |
| <b>Data File</b>          | 20220822 BHZ-YP-4du.wiff          | <b>Injection Volume</b> | 10              |
| <b>Acquisition Date</b>   | 8/22/2022 5:50:38 PM              | <b>Algorithm Used</b>   | MQL             |
| <b>Acquisition Method</b> | BHZ method.dam                    | <b>Sample Type</b>      | Unknown         |
| <b>Instrument Name</b>    | AB SCIEX Triple Quad 4500         | <b>Result Table</b>     | 4-0.02-0d-3.rdb |
| <b>Sample ID</b>          | <i>No data for Sample ID</i>      | <b>Dilution Factor</b>  | 1.00            |
| <b>Sample Comment</b>     | <i>No data for Sample Comment</i> | <b>Weight to Volume</b> | 0.00            |

Approved By (Date and Initials): \_\_\_\_\_.

|  |                       |                                                         |
|--|-----------------------|---------------------------------------------------------|
|  | <b>Compound Name:</b> | F1 (342.000/159.100 Da)                                 |
|  | Expected RT:          | 21.5                                                    |
|  | Actual RT:            | 21.5                                                    |
|  | Equation:             | At least 2 points are required to calculate regression. |
|  | Area Counts:          | 8.80e+006                                               |
|  | ISTD Area Counts:     | N/A                                                     |
|  | Amount:               | 0.00 (ng/mL)                                            |



|                                                                                   |                       |                                                         |
|-----------------------------------------------------------------------------------|-----------------------|---------------------------------------------------------|
| 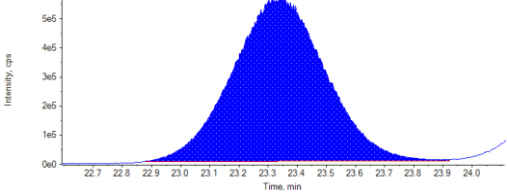 | <b>Compound Name:</b> | F2 (342.000/159.100 Da)                                 |
|                                                                                   | Expected RT:          | 23.4                                                    |
|                                                                                   | Actual RT:            | 23.4                                                    |
|                                                                                   | Equation:             | At least 2 points are required to calculate regression. |
|                                                                                   | Area Counts:          | 1.26e+007                                               |
|                                                                                   | ISTD Area Counts:     | N/A                                                     |
|                                                                                   | Amount:               | 0.00 (ng/mL)                                            |
|  | <b>Compound Name:</b> | F3 (342.000/159.100 Da)                                 |
|                                                                                   | Expected RT:          | 24.4                                                    |
|                                                                                   | Actual RT:            | 24.4                                                    |
|                                                                                   | Equation:             | At least 2 points are required to calculate regression. |
|                                                                                   | Area Counts:          | 8.60e+006                                               |
|                                                                                   | ISTD Area Counts:     | N/A                                                     |
|                                                                                   | Amount:               | 0.00 (ng/mL)                                            |
|  | <b>Compound Name:</b> | F4 (342.000/159.100 Da)                                 |
|                                                                                   | Expected RT:          | 25.9                                                    |
|                                                                                   | Actual RT:            | 25.9                                                    |
|                                                                                   | Equation:             | At least 2 points are required to calculate regression. |
|                                                                                   | Area Counts:          | 1.31e+007                                               |
|                                                                                   | ISTD Area Counts:     | N/A                                                     |
|                                                                                   | Amount:               | 0.00 (ng/mL)                                            |

Figure S4      Figure S4 The LC chromatogram of plums treated with 0.020 a.i. g/L propiconazole at 0 d

Figure Caption  
Figure\_5\_SuppInfo.

|                           |                           |                          |                                      |
|---------------------------|---------------------------|--------------------------|--------------------------------------|
| <b>Data File</b>          | 20220820 BHZ-YP-20du.wiff | <b>Result Table</b>      | 20-0.004-5d-2.rdb                    |
| <b>Acquisition Date</b>   | 8/21/2022 2:34:46 PM      | <b>Algorithm Used</b>    | MQL                                  |
| <b>Acquisition Method</b> | BHZ method.dam            | <b>Instrument Name</b>   | AB SCIEX Triple Quad 4500            |
| <b>Project</b>            | DPY                       | <b>Processing Method</b> | <i>No data for Processing Method</i> |

Sample Name: 0.004-5d-2 Vial #: 56

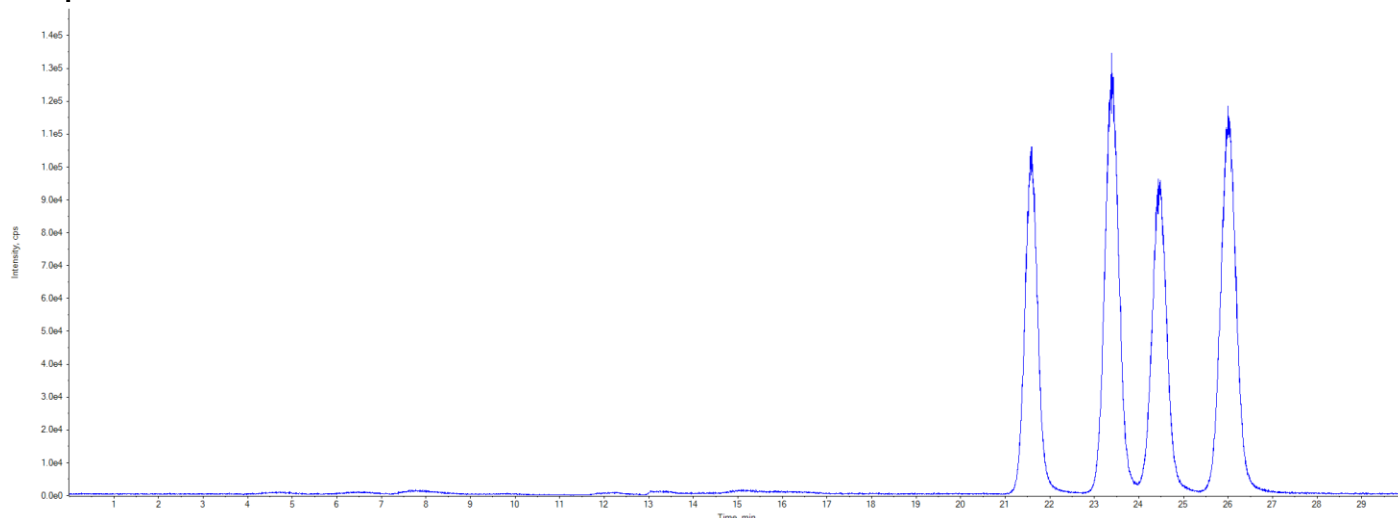

|                           |                                   |                         |                   |
|---------------------------|-----------------------------------|-------------------------|-------------------|
| <b>Sample Name</b>        | 0.004-5d-2                        | <b>Injection Vial</b>   | 56                |
| <b>Data File</b>          | 20220820 BHZ-YP-20du.wiff         | <b>Injection Volume</b> | 10                |
| <b>Acquisition Date</b>   | 8/21/2022 2:34:46 PM              | <b>Algorithm Used</b>   | MQL               |
| <b>Acquisition Method</b> | BHZ method.dam                    | <b>Sample Type</b>      | Unknown           |
| <b>Instrument Name</b>    | AB SCIEX Triple Quad 4500         | <b>Result Table</b>     | 20-0.004-5d-2.rdb |
| <b>Sample ID</b>          | <i>No data for Sample ID</i>      | <b>Dilution Factor</b>  | 1.00              |
| <b>Sample Comment</b>     | <i>No data for Sample Comment</i> | <b>Weight to Volume</b> | 0.00              |

Approved By (Date and Initials): \_\_\_\_\_.

|  |                       |                                                         |
|--|-----------------------|---------------------------------------------------------|
|  | <b>Compound Name:</b> | F1 (342.000/159.100 Da)                                 |
|  | Expected RT:          | 21.6                                                    |
|  | Actual RT:            | 21.6                                                    |
|  | Equation:             | At least 2 points are required to calculate regression. |
|  | Area Counts:          | 1.72e+006                                               |
|  | ISTD Area Counts:     | N/A                                                     |
|  | Amount:               | 0.00 (ng/mL)                                            |

|                                                                                  |                       |                                                         |
|----------------------------------------------------------------------------------|-----------------------|---------------------------------------------------------|
| 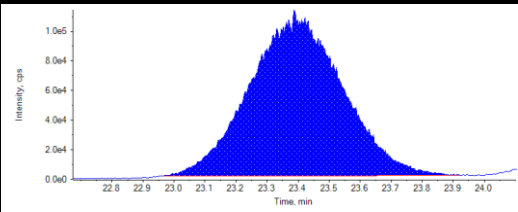 | <b>Compound Name:</b> | <b>F2 (342.000/159.100 Da)</b>                          |
|                                                                                  | Expected RT:          | 23.4                                                    |
|                                                                                  | Actual RT:            | 23.4                                                    |
|                                                                                  | Equation:             | At least 2 points are required to calculate regression. |
|                                                                                  | Area Counts:          | 2.31e+006                                               |
|                                                                                  | ISTD Area Counts:     | N/A                                                     |
|                                                                                  | Amount:               | 0.00 (ng/mL)                                            |
|  | <b>Compound Name:</b> | <b>F3 (342.000/159.100 Da)</b>                          |
|                                                                                  | Expected RT:          | 24.5                                                    |
|                                                                                  | Actual RT:            | 24.5                                                    |
|                                                                                  | Equation:             | At least 2 points are required to calculate regression. |
|                                                                                  | Area Counts:          | 1.72e+006                                               |
|                                                                                  | ISTD Area Counts:     | N/A                                                     |
|                                                                                  | Amount:               | 0.00 (ng/mL)                                            |
|  | <b>Compound Name:</b> | <b>F4 (342.000/159.100 Da)</b>                          |
|                                                                                  | Expected RT:          | 26.0                                                    |
|                                                                                  | Actual RT:            | 26.0                                                    |
|                                                                                  | Equation:             | At least 2 points are required to calculate regression. |
|                                                                                  | Area Counts:          | 2.33e+006                                               |
|                                                                                  | ISTD Area Counts:     | N/A                                                     |
|                                                                                  | Amount:               | 0.00 (ng/mL)                                            |

Figure S5 The LC chromatogram of plums treated with 0.004 a.i. g/L propiconazole at 5 d (20°C)

Figure Caption  
Figure\_6\_SuppInfo.

|                           |                           |                          |                                      |
|---------------------------|---------------------------|--------------------------|--------------------------------------|
| <b>Data File</b>          | 20220820 BHZ-YP-20du.wiff | <b>Result Table</b>      | 20-0.004-10d-1.rdb                   |
| <b>Acquisition Date</b>   | 8/21/2022 12:28:49 PM     | <b>Algorithm Used</b>    | MQL                                  |
| <b>Acquisition Method</b> | BHZ method.dam            | <b>Instrument Name</b>   | AB SCIEX Triple Quad 4500            |
| <b>Project</b>            | DPY                       | <b>Processing Method</b> | <i>No data for Processing Method</i> |

Sample Name: 0.004-10d-1 Vial #: 52

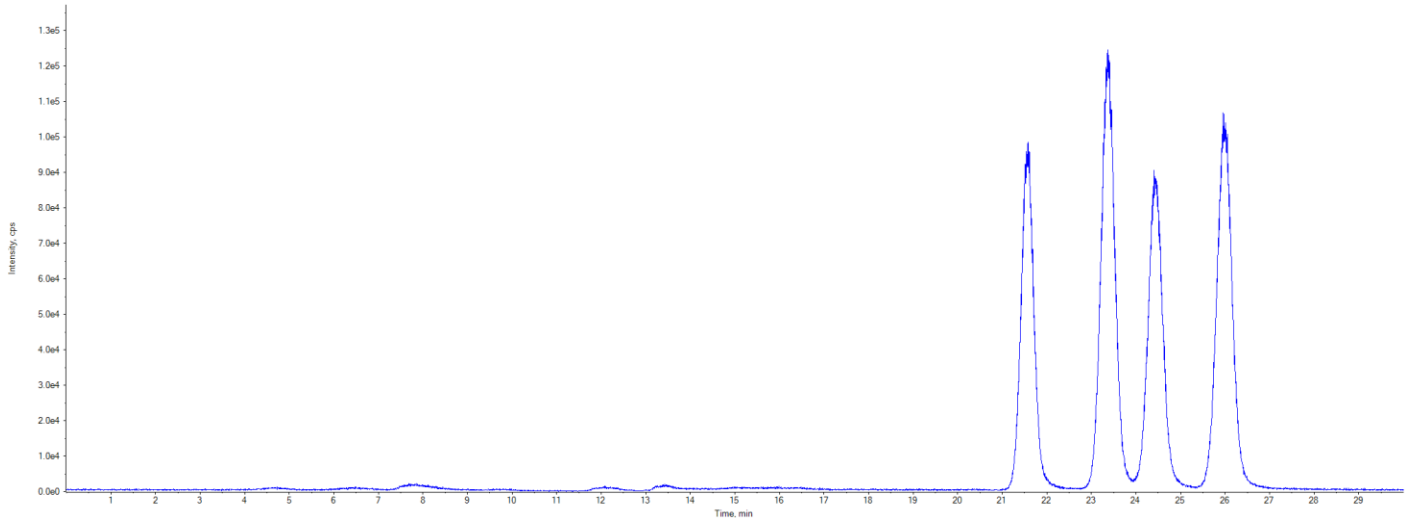

|                           |                                   |                         |                    |
|---------------------------|-----------------------------------|-------------------------|--------------------|
| <b>Sample Name</b>        | 0.004-10d-1                       | <b>Injection Vial</b>   | 52                 |
| <b>Data File</b>          | 20220820 BHZ-YP-20du.wiff         | <b>Injection Volume</b> | 10                 |
| <b>Acquisition Date</b>   | 8/21/2022 12:28:49 PM             | <b>Algorithm Used</b>   | MQL                |
| <b>Acquisition Method</b> | BHZ method.dam                    | <b>Sample Type</b>      | Unknown            |
| <b>Instrument Name</b>    | AB SCIEX Triple Quad 4500         | <b>Result Table</b>     | 20-0.004-10d-1.rdb |
| <b>Sample ID</b>          | <i>No data for Sample ID</i>      | <b>Dilution Factor</b>  | 1.00               |
| <b>Sample Comment</b>     | <i>No data for Sample Comment</i> | <b>Weight to Volume</b> | 0.00               |

Approved By (Date and Initials): \_\_\_\_\_.

|  |                       |                                                         |
|--|-----------------------|---------------------------------------------------------|
|  | <b>Compound Name:</b> | F1 (342.000/159.100 Da)                                 |
|  | Expected RT:          | 21.6                                                    |
|  | Actual RT:            | 21.6                                                    |
|  | Equation:             | At least 2 points are required to calculate regression. |
|  | Area Counts:          | 1.61e+006                                               |
|  | ISTD Area Counts:     | N/A                                                     |
|  | Amount:               | 0.00 (ng/mL)                                            |

|                                                                                  |                       |                                                         |
|----------------------------------------------------------------------------------|-----------------------|---------------------------------------------------------|
| 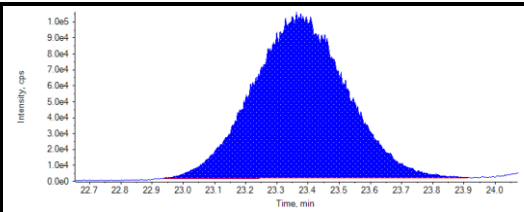 | <b>Compound Name:</b> | <b>F2 (342.000/159.100 Da)</b>                          |
|                                                                                  | Expected RT:          | 23.4                                                    |
|                                                                                  | Actual RT:            | 23.4                                                    |
|                                                                                  | Equation:             | At least 2 points are required to calculate regression. |
|                                                                                  | Area Counts:          | 2.19e+006                                               |
|                                                                                  | ISTD Area Counts:     | N/A                                                     |
|  | <b>Compound Name:</b> | <b>F3 (342.000/159.100 Da)</b>                          |
|                                                                                  | Expected RT:          | 24.4                                                    |
|                                                                                  | Actual RT:            | 24.4                                                    |
|                                                                                  | Equation:             | At least 2 points are required to calculate regression. |
|                                                                                  | Area Counts:          | 1.60e+006                                               |
|                                                                                  | ISTD Area Counts:     | N/A                                                     |
|  | <b>Compound Name:</b> | <b>F4 (342.000/159.100 Da)</b>                          |
|                                                                                  | Expected RT:          | 25.9                                                    |
|                                                                                  | Actual RT:            | 25.9                                                    |
|                                                                                  | Equation:             | At least 2 points are required to calculate regression. |
|                                                                                  | Area Counts:          | 2.08e+006                                               |
|                                                                                  | ISTD Area Counts:     | N/A                                                     |
|                                                                                  | Amount:               | 0.00 (ng/mL)                                            |

Figure S6 The LC chromatogram of plums treated with 0.004 a.i. g/L propiconazole at 10 d (20°C)

Figure Caption  
Figure\_7\_SuppInfo.

|                           |                           |                          |                                      |
|---------------------------|---------------------------|--------------------------|--------------------------------------|
| <b>Data File</b>          | 20220820 BHZ-YP-20du.wiff | <b>Result Table</b>      | 20-0.004-15d-3.rdb                   |
| <b>Acquisition Date</b>   | 8/21/2022 11:57:21 AM     | <b>Algorithm Used</b>    | MQL                                  |
| <b>Acquisition Method</b> | BHZ method.dam            | <b>Instrument Name</b>   | AB SCIEX Triple Quad 4500            |
| <b>Project</b>            | DPY                       | <b>Processing Method</b> | <i>No data for Processing Method</i> |

Sample Name: 0.004-15d-3 Vial #: 51

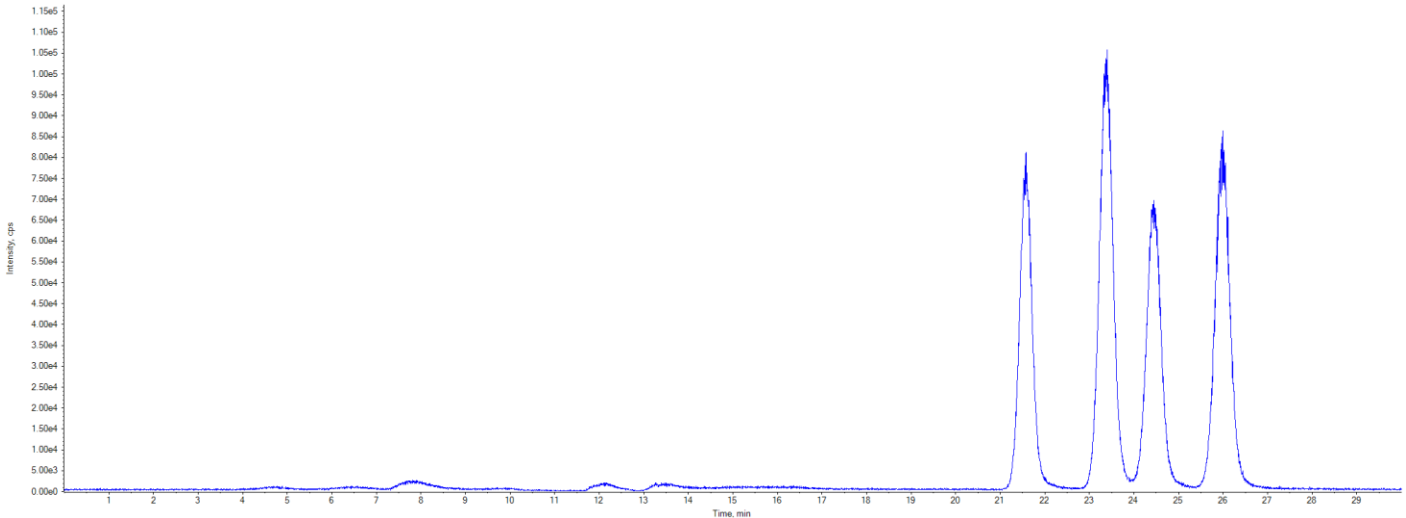

|                           |                                   |                         |                    |
|---------------------------|-----------------------------------|-------------------------|--------------------|
| <b>Sample Name</b>        | 0.004-15d-3                       | <b>Injection Vial</b>   | 51                 |
| <b>Data File</b>          | 20220820 BHZ-YP-20du.wiff         | <b>Injection Volume</b> | 10                 |
| <b>Acquisition Date</b>   | 8/21/2022 11:57:21 AM             | <b>Algorithm Used</b>   | MQL                |
| <b>Acquisition Method</b> | BHZ method.dam                    | <b>Sample Type</b>      | Unknown            |
| <b>Instrument Name</b>    | AB SCIEX Triple Quad 4500         | <b>Result Table</b>     | 20-0.004-15d-3.rdb |
| <b>Sample ID</b>          | <i>No data for Sample ID</i>      | <b>Dilution Factor</b>  | 1.00               |
| <b>Sample Comment</b>     | <i>No data for Sample Comment</i> | <b>Weight to Volume</b> | 0.00               |

Approved By (Date and Initials): \_\_\_\_\_.

|  |                       |                                                         |
|--|-----------------------|---------------------------------------------------------|
|  | <b>Compound Name:</b> | F1 (342.000/159.100 Da)                                 |
|  | Expected RT:          | 21.6                                                    |
|  | Actual RT:            | 21.6                                                    |
|  | Equation:             | At least 2 points are required to calculate regression. |
|  | Area Counts:          | 1.28e+006                                               |
|  | ISTD Area Counts:     | N/A                                                     |
|  | Amount:               | 0.00 (ng/mL)                                            |

|                                                                                  |                       |                                                         |
|----------------------------------------------------------------------------------|-----------------------|---------------------------------------------------------|
| 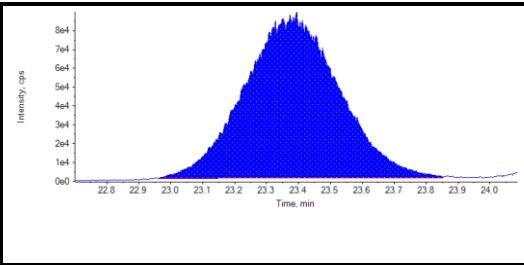 | <b>Compound Name:</b> | <b>F2 (342.000/159.100 Da)</b>                          |
|                                                                                  | Expected RT:          | 23.4                                                    |
|                                                                                  | Actual RT:            | 23.4                                                    |
|                                                                                  | Equation:             | At least 2 points are required to calculate regression. |
|                                                                                  | Area Counts:          | 1.81e+006                                               |
|                                                                                  | ISTD Area Counts:     | N/A                                                     |
|  | <b>Compound Name:</b> | <b>F3 (342.000/159.100 Da)</b>                          |
|                                                                                  | Expected RT:          | 24.5                                                    |
|                                                                                  | Actual RT:            | 24.5                                                    |
|                                                                                  | Equation:             | At least 2 points are required to calculate regression. |
|                                                                                  | Area Counts:          | 1.24e+006                                               |
|                                                                                  | ISTD Area Counts:     | N/A                                                     |
|  | <b>Compound Name:</b> | <b>F4 (342.000/159.100 Da)</b>                          |
|                                                                                  | Expected RT:          | 26.0                                                    |
|                                                                                  | Actual RT:            | 26.0                                                    |
|                                                                                  | Equation:             | At least 2 points are required to calculate regression. |
|                                                                                  | Area Counts:          | 1.61e+006                                               |
|                                                                                  | ISTD Area Counts:     | N/A                                                     |
|                                                                                  | Amount:               | 0.00 (ng/mL)                                            |

Figure S7      The LC chromatogram of plums treated with 0.004 a.i. g/L propiconazole at 15 d (20°C)

Figure Caption  
Figure\_8\_SuppInfo.

|                           |                           |                          |                                      |
|---------------------------|---------------------------|--------------------------|--------------------------------------|
| <b>Data File</b>          | 20220820 BHZ-YP-20du.wiff | <b>Result Table</b>      | 20-0.004-20d-2.rdb                   |
| <b>Acquisition Date</b>   | 8/21/2022 10:23:01 AM     | <b>Algorithm Used</b>    | MQL                                  |
| <b>Acquisition Method</b> | BHZ method.dam            | <b>Instrument Name</b>   | AB SCIEX Triple Quad 4500            |
| <b>Project</b>            | DPY                       | <b>Processing Method</b> | <i>No data for Processing Method</i> |

Sample Name: 0.004-20d-3 Vial #: 48

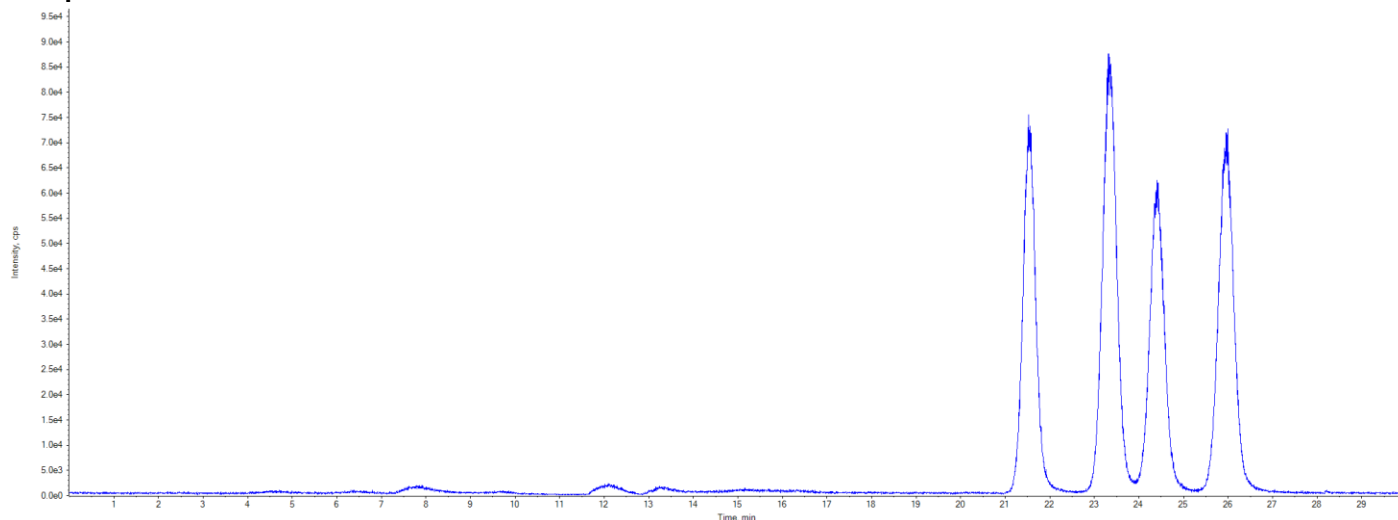

|                           |                                   |                         |                    |
|---------------------------|-----------------------------------|-------------------------|--------------------|
| <b>Sample Name</b>        | 0.004-20d-3                       | <b>Injection Vial</b>   | 48                 |
| <b>Data File</b>          | 20220820 BHZ-YP-20du.wiff         | <b>Injection Volume</b> | 10                 |
| <b>Acquisition Date</b>   | 8/21/2022 10:23:01 AM             | <b>Algorithm Used</b>   | MQL                |
| <b>Acquisition Method</b> | BHZ method.dam                    | <b>Sample Type</b>      | Unknown            |
| <b>Instrument Name</b>    | AB SCIEX Triple Quad 4500         | <b>Result Table</b>     | 20-0.004-20d-2.rdb |
| <b>Sample ID</b>          | <i>No data for Sample ID</i>      | <b>Dilution Factor</b>  | 1.00               |
| <b>Sample Comment</b>     | <i>No data for Sample Comment</i> | <b>Weight to Volume</b> | 0.00               |

Approved By (Date and Initials): \_\_\_\_\_.

|  |                       |                                                         |
|--|-----------------------|---------------------------------------------------------|
|  | <b>Compound Name:</b> | F1 (342.000/159.100 Da)                                 |
|  | Expected RT:          | 21.5                                                    |
|  | Actual RT:            | 21.5                                                    |
|  | Equation:             | At least 2 points are required to calculate regression. |
|  | Area Counts:          | 1.12e+006                                               |
|  | ISTD Area Counts:     | N/A                                                     |
|  | Amount:               | 0.00 (ng/mL)                                            |



|                                                                                  |                       |                                                         |
|----------------------------------------------------------------------------------|-----------------------|---------------------------------------------------------|
| 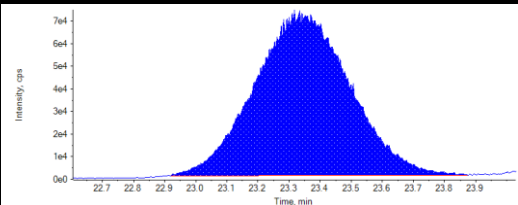 | <b>Compound Name:</b> | <b>F2 (342.000/159.100 Da)</b>                          |
|                                                                                  | Expected RT:          | 23.3                                                    |
|                                                                                  | Actual RT:            | 23.3                                                    |
|                                                                                  | Equation:             | At least 2 points are required to calculate regression. |
|                                                                                  | Area Counts:          | 1.48e+006                                               |
|                                                                                  | ISTD Area Counts:     | N/A                                                     |
|  | <b>Compound Name:</b> | <b>F3 (342.000/159.100 Da)</b>                          |
|                                                                                  | Expected RT:          | 24.4                                                    |
|                                                                                  | Actual RT:            | 24.4                                                    |
|                                                                                  | Equation:             | At least 2 points are required to calculate regression. |
|                                                                                  | Area Counts:          | 1.03e+006                                               |
|                                                                                  | ISTD Area Counts:     | N/A                                                     |
|  | <b>Compound Name:</b> | <b>F4 (342.000/159.100 Da)</b>                          |
|                                                                                  | Expected RT:          | 26.0                                                    |
|                                                                                  | Actual RT:            | 26.0                                                    |
|                                                                                  | Equation:             | At least 2 points are required to calculate regression. |
|                                                                                  | Area Counts:          | 1.30e+006                                               |
|                                                                                  | ISTD Area Counts:     | N/A                                                     |
|                                                                                  | Amount:               | 0.00 (ng/mL)                                            |

Figure S8 The LC chromatogram of plums treated with 0.004 a.i. g/L propiconazole at 20 d (20°C)

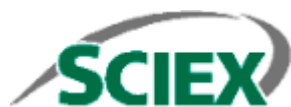

Figure Caption  
 Figure\_9\_SuppInfo.

|                           |                           |                          |                                      |
|---------------------------|---------------------------|--------------------------|--------------------------------------|
| <b>Data File</b>          | 20220820 BHZ-YP-20du.wiff | <b>Result Table</b>      | 20-0.004-25d-2.rdb                   |
| <b>Acquisition Date</b>   | 8/21/2022 8:17:11 AM      | <b>Algorithm Used</b>    | IntelliQuan                          |
| <b>Acquisition Method</b> | BHZ method.dam            | <b>Instrument Name</b>   | AB SCIEX Triple Quad 4500            |
| <b>Project</b>            | DPY                       | <b>Processing Method</b> | <i>No data for Processing Method</i> |

**Sample Name:** 0.004-25d-2 **Vial #:** 44

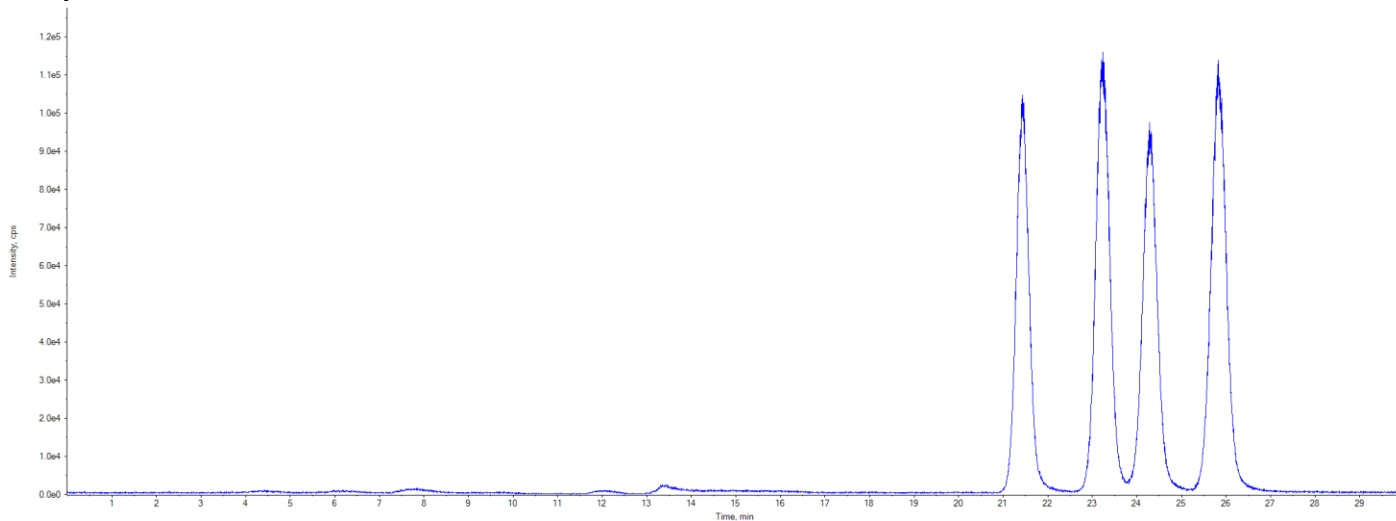

|                           |                                   |                         |                    |
|---------------------------|-----------------------------------|-------------------------|--------------------|
| <b>Sample Name</b>        | 0.004-25d-2                       | <b>Injection Vial</b>   | 44                 |
| <b>Data File</b>          | 20220820 BHZ-YP-20du.wiff         | <b>Injection Volume</b> | 10                 |
| <b>Acquisition Date</b>   | 8/21/2022 8:17:11 AM              | <b>Algorithm Used</b>   | IntelliQuan        |
| <b>Acquisition Method</b> | BHZ method.dam                    | <b>Sample Type</b>      | Unknown            |
| <b>Instrument Name</b>    | AB SCIEX Triple Quad 4500         | <b>Result Table</b>     | 20-0.004-25d-2.rdb |
| <b>Sample ID</b>          | <i>No data for Sample ID</i>      | <b>Dilution Factor</b>  | 1.00               |
| <b>Sample Comment</b>     | <i>No data for Sample Comment</i> | <b>Weight to Volume</b> | 0.00               |

Approved By (Date and Initials): \_\_\_\_\_.

|                                                                                                                                                                                                                                                                                                |                       |                                                         |
|------------------------------------------------------------------------------------------------------------------------------------------------------------------------------------------------------------------------------------------------------------------------------------------------|-----------------------|---------------------------------------------------------|
| <p>The zoomed-in chromatogram shows a single, well-resolved peak at approximately 21.4 minutes. The y-axis (intensity in cps) ranges from 0e0 to 8e4, and the x-axis (time in minutes) ranges from 20.8 to 22.1. The peak is symmetric and reaches a maximum intensity of about 7.5e4 cps.</p> | <b>Compound Name:</b> | F1 (342.000/159.100 Da)                                 |
|                                                                                                                                                                                                                                                                                                | Expected RT:          | 21.4                                                    |
|                                                                                                                                                                                                                                                                                                | Actual RT:            | 21.4                                                    |
|                                                                                                                                                                                                                                                                                                | Equation:             | At least 2 points are required to calculate regression. |
|                                                                                                                                                                                                                                                                                                | Area Counts:          | 1.73e+006                                               |
|                                                                                                                                                                                                                                                                                                | ISTD Area Counts:     | N/A                                                     |
|                                                                                                                                                                                                                                                                                                | Amount:               | 0.00 (ng/mL)                                            |

|                                                                                   |                       |                                                         |
|-----------------------------------------------------------------------------------|-----------------------|---------------------------------------------------------|
| 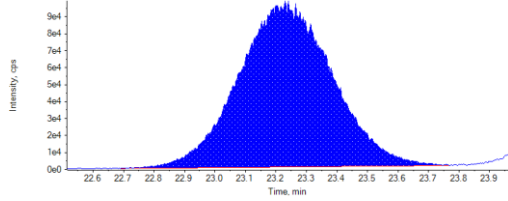 | <b>Compound Name:</b> | F2 (342.000/159.100 Da)                                 |
|                                                                                   | Expected RT:          | 23.2                                                    |
|                                                                                   | Actual RT:            | 23.2                                                    |
|                                                                                   | Equation:             | At least 2 points are required to calculate regression. |
|                                                                                   | Area Counts:          | 2.07e+006                                               |
|                                                                                   | ISTD Area Counts:     | N/A                                                     |
|  | <b>Compound Name:</b> | F3 (342.000/159.100 Da)                                 |
|                                                                                   | Expected RT:          | 24.3                                                    |
|                                                                                   | Actual RT:            | 24.3                                                    |
|                                                                                   | Equation:             | At least 2 points are required to calculate regression. |
|                                                                                   | Area Counts:          | 1.72e+006                                               |
|                                                                                   | ISTD Area Counts:     | N/A                                                     |
|  | <b>Compound Name:</b> | F4 (342.000/159.100 Da)                                 |
|                                                                                   | Expected RT:          | 25.8                                                    |
|                                                                                   | Actual RT:            | 25.8                                                    |
|                                                                                   | Equation:             | At least 2 points are required to calculate regression. |
|                                                                                   | Area Counts:          | 2.24e+006                                               |
|                                                                                   | ISTD Area Counts:     | N/A                                                     |
|                                                                                   | Amount:               | 0.00 (ng/mL)                                            |

Figure S9 plums treated with 0.004 a.i. g/L propiconazole were sampled on 25d when stored at 20°C



Figure Caption  
 Figure\_10\_SuppInfo.

|                           |                           |                          |                                      |
|---------------------------|---------------------------|--------------------------|--------------------------------------|
| <b>Data File</b>          | 20220820 BHZ-YP-20du.wiff | <b>Result Table</b>      | 20-0.004-30d-2.rdb                   |
| <b>Acquisition Date</b>   | 8/21/2022 6:42:48 AM      | <b>Algorithm Used</b>    | MQL                                  |
| <b>Acquisition Method</b> | BHZ method.dam            | <b>Instrument Name</b>   | AB SCIEX Triple Quad 4500            |
| <b>Project</b>            | DPY                       | <b>Processing Method</b> | <i>No data for Processing Method</i> |

Sample Name: 0.004-30d-2 Vial #: 41

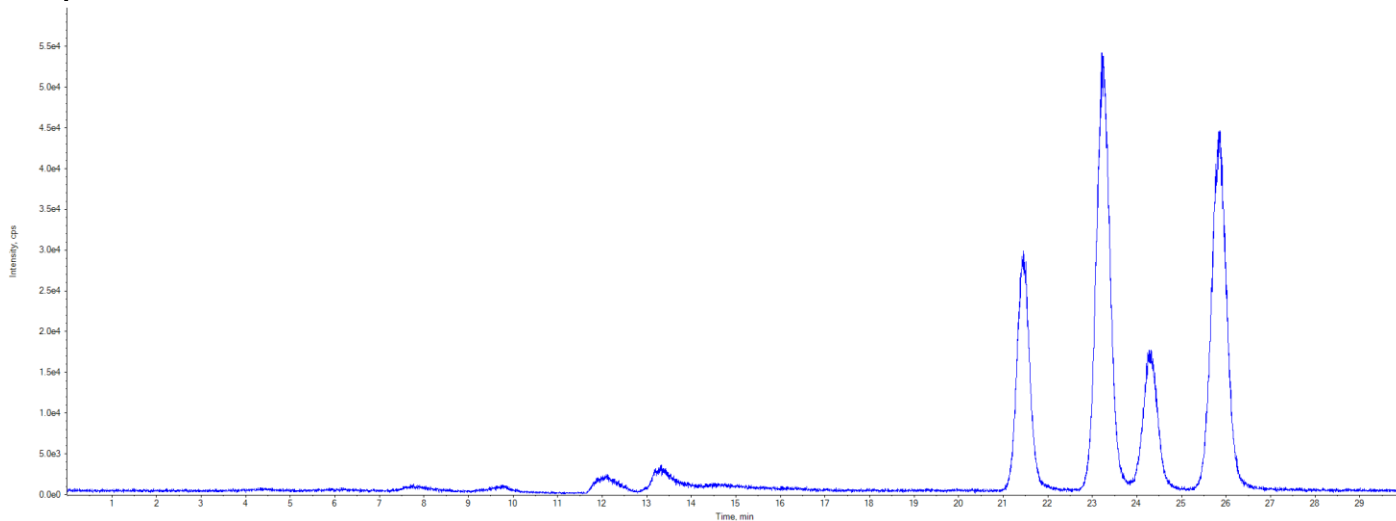

|                           |                                   |                         |                    |
|---------------------------|-----------------------------------|-------------------------|--------------------|
| <b>Sample Name</b>        | 0.004-30d-2                       | <b>Injection Vial</b>   | 41                 |
| <b>Data File</b>          | 20220820 BHZ-YP-20du.wiff         | <b>Injection Volume</b> | 10                 |
| <b>Acquisition Date</b>   | 8/21/2022 6:42:48 AM              | <b>Algorithm Used</b>   | MQL                |
| <b>Acquisition Method</b> | BHZ method.dam                    | <b>Sample Type</b>      | Unknown            |
| <b>Instrument Name</b>    | AB SCIEX Triple Quad 4500         | <b>Result Table</b>     | 20-0.004-30d-2.rdb |
| <b>Sample ID</b>          | <i>No data for Sample ID</i>      | <b>Dilution Factor</b>  | 1.00               |
| <b>Sample Comment</b>     | <i>No data for Sample Comment</i> | <b>Weight to Volume</b> | 0.00               |

Approved By (Date and Initials): \_\_\_\_\_.

|                                                                                                                                                                                                                                                                                          |                       |                                                         |
|------------------------------------------------------------------------------------------------------------------------------------------------------------------------------------------------------------------------------------------------------------------------------------------|-----------------------|---------------------------------------------------------|
| <p>The zoomed-in chromatogram shows a single, well-resolved peak at 21.5 minutes. The y-axis represents intensity (cps) from 0 to 25,000, and the x-axis represents time (min) from 20.8 to 22.1. The peak is symmetric and reaches a maximum intensity of approximately 22,000 cps.</p> | <b>Compound Name:</b> | F1 (342.000/159.100 Da)                                 |
|                                                                                                                                                                                                                                                                                          | Expected RT:          | 21.5                                                    |
|                                                                                                                                                                                                                                                                                          | Actual RT:            | 21.5                                                    |
|                                                                                                                                                                                                                                                                                          | Equation:             | At least 2 points are required to calculate regression. |
|                                                                                                                                                                                                                                                                                          | Area Counts:          | 4.80e+005                                               |
|                                                                                                                                                                                                                                                                                          | ISTD Area Counts:     | N/A                                                     |
|                                                                                                                                                                                                                                                                                          | Amount:               | 0.00 (ng/mL)                                            |

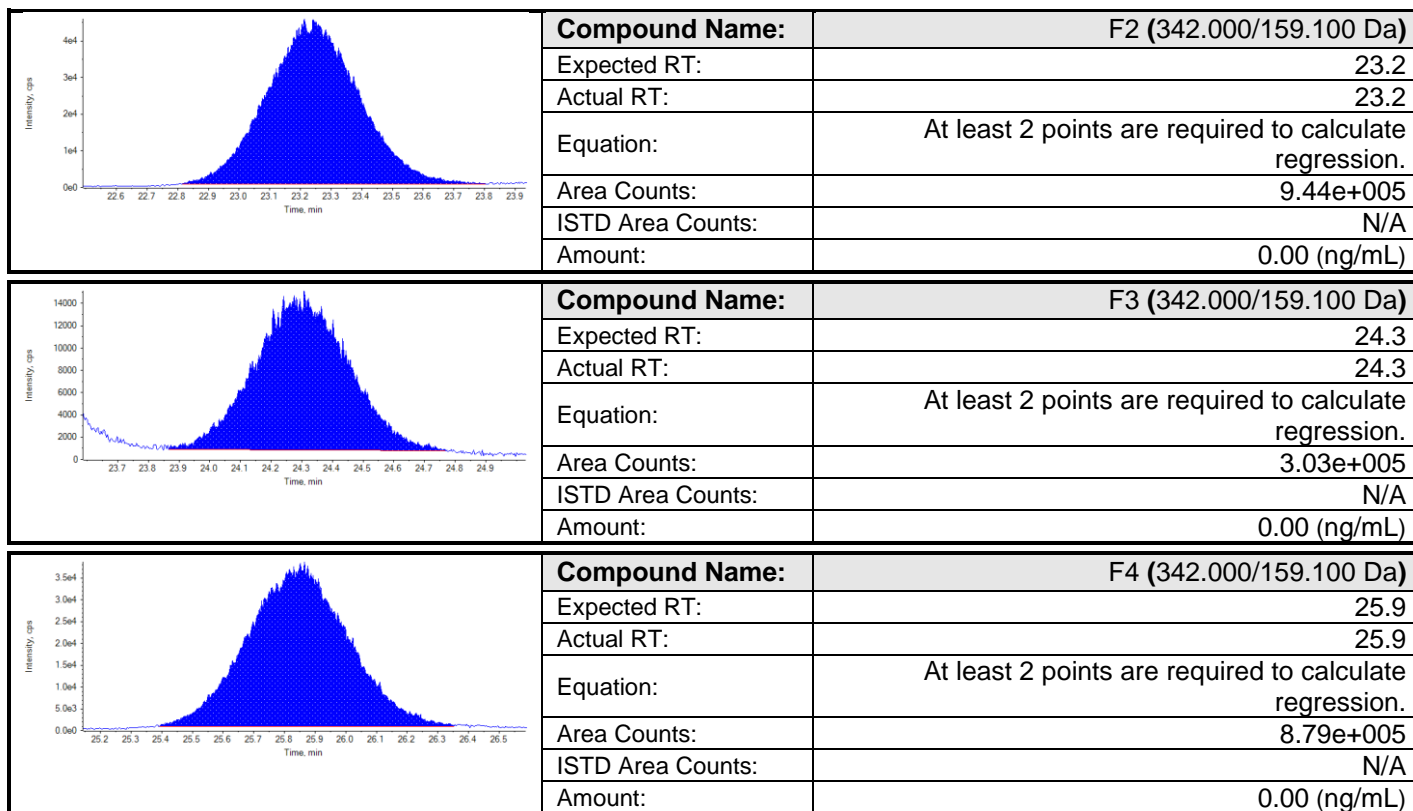

Figure S10 The LC chromatogram of plums treated with 0.004 a.i. g/L propiconazole at 30 d (20°C)

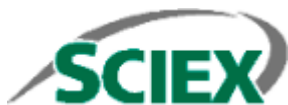

Figure Caption  
 Figure\_11\_SuppInfo.

|                           |                           |                          |                                      |
|---------------------------|---------------------------|--------------------------|--------------------------------------|
| <b>Data File</b>          | 20220820 BHZ-YP-20du.wiff | <b>Result Table</b>      | 20-0.02-5d-1.rdb                     |
| <b>Acquisition Date</b>   | 8/21/2022 1:28:15 AM      | <b>Algorithm Used</b>    | MQL                                  |
| <b>Acquisition Method</b> | BHZ method.dam            | <b>Instrument Name</b>   | AB SCIEX Triple Quad 4500            |
| <b>Project</b>            | DPY                       | <b>Processing Method</b> | <i>No data for Processing Method</i> |

**Sample Name:** 0.02-5d-1 **Vial #:** 31

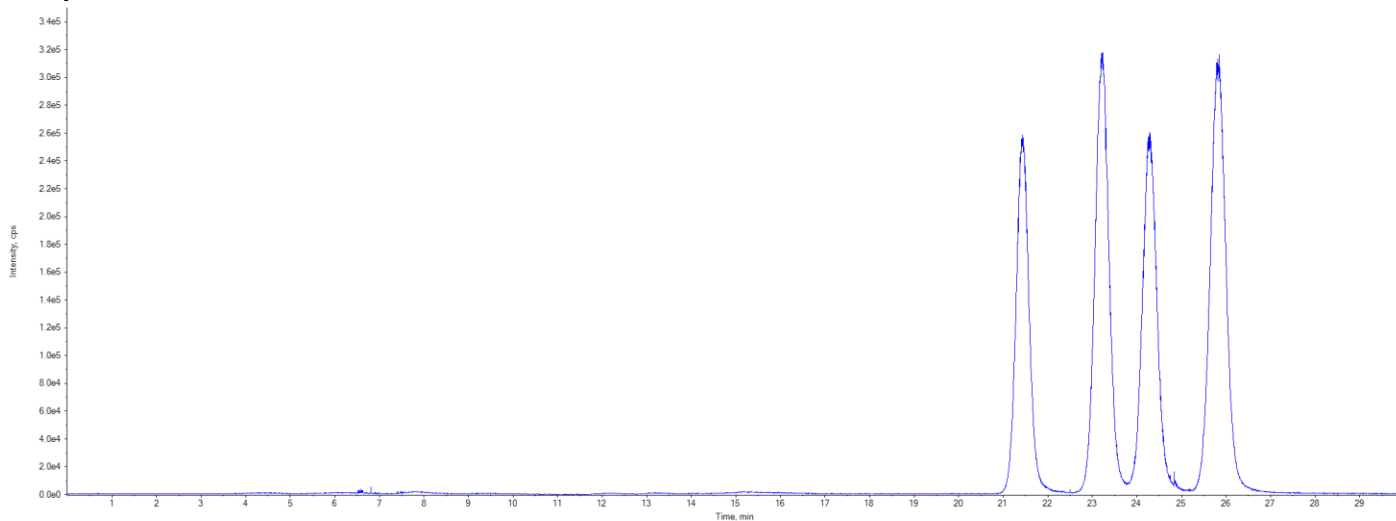

|                           |                                   |                         |                  |
|---------------------------|-----------------------------------|-------------------------|------------------|
| <b>Sample Name</b>        | 0.02-5d-1                         | <b>Injection Vial</b>   | 31               |
| <b>Data File</b>          | 20220820 BHZ-YP-20du.wiff         | <b>Injection Volume</b> | 10               |
| <b>Acquisition Date</b>   | 8/21/2022 1:28:15 AM              | <b>Algorithm Used</b>   | MQL              |
| <b>Acquisition Method</b> | BHZ method.dam                    | <b>Sample Type</b>      | Unknown          |
| <b>Instrument Name</b>    | AB SCIEX Triple Quad 4500         | <b>Result Table</b>     | 20-0.02-5d-1.rdb |
| <b>Sample ID</b>          | <i>No data for Sample ID</i>      | <b>Dilution Factor</b>  | 1.00             |
| <b>Sample Comment</b>     | <i>No data for Sample Comment</i> | <b>Weight to Volume</b> | 0.00             |

Approved By (Date and Initials): \_\_\_\_\_.

|                                                                                                                                                                       |                       |                                                         |
|-----------------------------------------------------------------------------------------------------------------------------------------------------------------------|-----------------------|---------------------------------------------------------|
| <p>The zoomed-in peak shows intensity (cps) on the y-axis (0.0e0 to 2.0e5) against time (min) on the x-axis (20.8 to 22.1). The peak is centered at 21.4 minutes.</p> | <b>Compound Name:</b> | F1 (342.000/159.100 Da)                                 |
|                                                                                                                                                                       | Expected RT:          | 21.4                                                    |
|                                                                                                                                                                       | Actual RT:            | 21.4                                                    |
|                                                                                                                                                                       | Equation:             | At least 2 points are required to calculate regression. |
|                                                                                                                                                                       | Area Counts:          | 4.33e+006                                               |
|                                                                                                                                                                       | ISTD Area Counts:     | N/A                                                     |
|                                                                                                                                                                       | Amount:               | 0.00 (ng/mL)                                            |

|                                                                                   |                       |                                                         |
|-----------------------------------------------------------------------------------|-----------------------|---------------------------------------------------------|
| 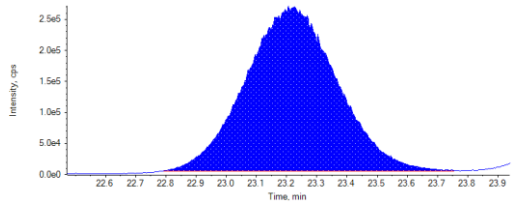 | <b>Compound Name:</b> | F2 (342.000/159.100 Da)                                 |
|                                                                                   | Expected RT:          | 23.2                                                    |
|                                                                                   | Actual RT:            | 23.2                                                    |
|                                                                                   | Equation:             | At least 2 points are required to calculate regression. |
|                                                                                   | Area Counts:          | 5.70e+006                                               |
|                                                                                   | ISTD Area Counts:     | N/A                                                     |
|  | <b>Compound Name:</b> | F3 (342.000/159.100 Da)                                 |
|                                                                                   | Expected RT:          | 24.3                                                    |
|                                                                                   | Actual RT:            | 24.3                                                    |
|                                                                                   | Equation:             | At least 2 points are required to calculate regression. |
|                                                                                   | Area Counts:          | 4.58e+006                                               |
|                                                                                   | ISTD Area Counts:     | N/A                                                     |
|  | <b>Compound Name:</b> | F4 (342.000/159.100 Da)                                 |
|                                                                                   | Expected RT:          | 25.8                                                    |
|                                                                                   | Actual RT:            | 25.8                                                    |
|                                                                                   | Equation:             | At least 2 points are required to calculate regression. |
|                                                                                   | Area Counts:          | 6.39e+006                                               |
|                                                                                   | ISTD Area Counts:     | N/A                                                     |
| Amount:                                                                           |                       | 0.00 (ng/mL)                                            |

Figure S11 The LC chromatogram of plums treated with 0.020 a.i. g/L propiconazole at 5 d (20°C)



Figure Caption  
 Figure\_12\_SuppInfo.

|                           |                           |                          |                                      |
|---------------------------|---------------------------|--------------------------|--------------------------------------|
| <b>Data File</b>          | 20220820 BHZ-YP-20du.wiff | <b>Result Table</b>      | 20-0.02-10d-1.rdb                    |
| <b>Acquisition Date</b>   | 8/20/2022 11:53:52 PM     | <b>Algorithm Used</b>    | MQL                                  |
| <b>Acquisition Method</b> | BHZ method.dam            | <b>Instrument Name</b>   | AB SCIEX Triple Quad 4500            |
| <b>Project</b>            | DPY                       | <b>Processing Method</b> | <i>No data for Processing Method</i> |

**Sample Name:** 0.02-10d-1 **Vial #:** 28

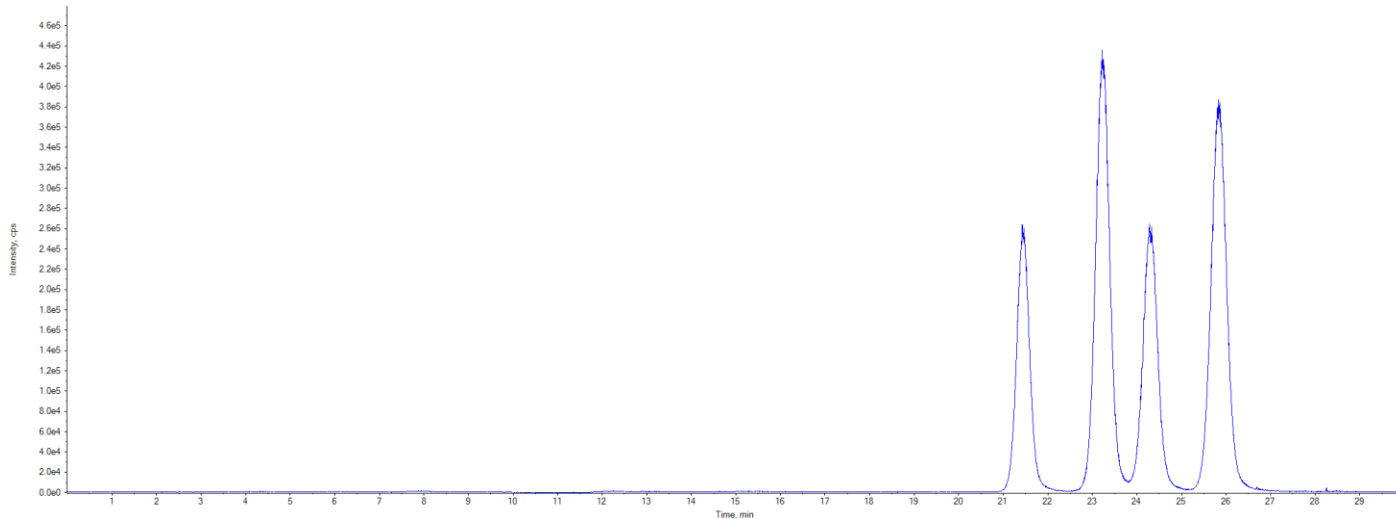

|                           |                                   |                         |                   |
|---------------------------|-----------------------------------|-------------------------|-------------------|
| <b>Sample Name</b>        | 0.02-10d-1                        | <b>Injection Vial</b>   | 28                |
| <b>Data File</b>          | 20220820 BHZ-YP-20du.wiff         | <b>Injection Volume</b> | 10                |
| <b>Acquisition Date</b>   | 8/20/2022 11:53:52 PM             | <b>Algorithm Used</b>   | MQL               |
| <b>Acquisition Method</b> | BHZ method.dam                    | <b>Sample Type</b>      | Unknown           |
| <b>Instrument Name</b>    | AB SCIEX Triple Quad 4500         | <b>Result Table</b>     | 20-0.02-10d-1.rdb |
| <b>Sample ID</b>          | <i>No data for Sample ID</i>      | <b>Dilution Factor</b>  | 1.00              |
| <b>Sample Comment</b>     | <i>No data for Sample Comment</i> | <b>Weight to Volume</b> | 0.00              |

Approved By (Date and Initials): \_\_\_\_\_.

|                                                                                                                                                                 |                       |                                                         |
|-----------------------------------------------------------------------------------------------------------------------------------------------------------------|-----------------------|---------------------------------------------------------|
| <p>The zoomed-in peak at 21.4 minutes shows a Gaussian fit with intensity (cps) on the y-axis (0.0e0 to 2.0e5) and time (min) on the x-axis (20.8 to 22.1).</p> | <b>Compound Name:</b> | F1 (342.000/159.100 Da)                                 |
|                                                                                                                                                                 | Expected RT:          | 21.4                                                    |
|                                                                                                                                                                 | Actual RT:            | 21.4                                                    |
|                                                                                                                                                                 | Equation:             | At least 2 points are required to calculate regression. |
|                                                                                                                                                                 | Area Counts:          | 4.42e+006                                               |
|                                                                                                                                                                 | ISTD Area Counts:     | N/A                                                     |
|                                                                                                                                                                 | Amount:               | 0.00 (ng/mL)                                            |



|                                                                                   |                                                                                                                                                                                                                                                                                                                                                                                                                                   |                       |                         |              |      |            |      |           |                                                         |              |           |                   |     |         |              |
|-----------------------------------------------------------------------------------|-----------------------------------------------------------------------------------------------------------------------------------------------------------------------------------------------------------------------------------------------------------------------------------------------------------------------------------------------------------------------------------------------------------------------------------|-----------------------|-------------------------|--------------|------|------------|------|-----------|---------------------------------------------------------|--------------|-----------|-------------------|-----|---------|--------------|
| 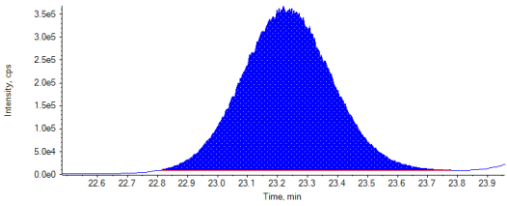 | <table> <tr> <td><b>Compound Name:</b></td><td>F2 (342.000/159.100 Da)</td></tr> <tr> <td>Expected RT:</td><td>23.2</td></tr> <tr> <td>Actual RT:</td><td>23.2</td></tr> <tr> <td>Equation:</td><td>At least 2 points are required to calculate regression.</td></tr> <tr> <td>Area Counts:</td><td>7.83e+006</td></tr> <tr> <td>ISTD Area Counts:</td><td>N/A</td></tr> <tr> <td>Amount:</td><td>0.00 (ng/mL)</td></tr> </table> | <b>Compound Name:</b> | F2 (342.000/159.100 Da) | Expected RT: | 23.2 | Actual RT: | 23.2 | Equation: | At least 2 points are required to calculate regression. | Area Counts: | 7.83e+006 | ISTD Area Counts: | N/A | Amount: | 0.00 (ng/mL) |
| <b>Compound Name:</b>                                                             | F2 (342.000/159.100 Da)                                                                                                                                                                                                                                                                                                                                                                                                           |                       |                         |              |      |            |      |           |                                                         |              |           |                   |     |         |              |
| Expected RT:                                                                      | 23.2                                                                                                                                                                                                                                                                                                                                                                                                                              |                       |                         |              |      |            |      |           |                                                         |              |           |                   |     |         |              |
| Actual RT:                                                                        | 23.2                                                                                                                                                                                                                                                                                                                                                                                                                              |                       |                         |              |      |            |      |           |                                                         |              |           |                   |     |         |              |
| Equation:                                                                         | At least 2 points are required to calculate regression.                                                                                                                                                                                                                                                                                                                                                                           |                       |                         |              |      |            |      |           |                                                         |              |           |                   |     |         |              |
| Area Counts:                                                                      | 7.83e+006                                                                                                                                                                                                                                                                                                                                                                                                                         |                       |                         |              |      |            |      |           |                                                         |              |           |                   |     |         |              |
| ISTD Area Counts:                                                                 | N/A                                                                                                                                                                                                                                                                                                                                                                                                                               |                       |                         |              |      |            |      |           |                                                         |              |           |                   |     |         |              |
| Amount:                                                                           | 0.00 (ng/mL)                                                                                                                                                                                                                                                                                                                                                                                                                      |                       |                         |              |      |            |      |           |                                                         |              |           |                   |     |         |              |
|  | <table> <tr> <td><b>Compound Name:</b></td><td>F3 (342.000/159.100 Da)</td></tr> <tr> <td>Expected RT:</td><td>24.3</td></tr> <tr> <td>Actual RT:</td><td>24.3</td></tr> <tr> <td>Equation:</td><td>At least 2 points are required to calculate regression.</td></tr> <tr> <td>Area Counts:</td><td>4.74e+006</td></tr> <tr> <td>ISTD Area Counts:</td><td>N/A</td></tr> <tr> <td>Amount:</td><td>0.00 (ng/mL)</td></tr> </table> | <b>Compound Name:</b> | F3 (342.000/159.100 Da) | Expected RT: | 24.3 | Actual RT: | 24.3 | Equation: | At least 2 points are required to calculate regression. | Area Counts: | 4.74e+006 | ISTD Area Counts: | N/A | Amount: | 0.00 (ng/mL) |
| <b>Compound Name:</b>                                                             | F3 (342.000/159.100 Da)                                                                                                                                                                                                                                                                                                                                                                                                           |                       |                         |              |      |            |      |           |                                                         |              |           |                   |     |         |              |
| Expected RT:                                                                      | 24.3                                                                                                                                                                                                                                                                                                                                                                                                                              |                       |                         |              |      |            |      |           |                                                         |              |           |                   |     |         |              |
| Actual RT:                                                                        | 24.3                                                                                                                                                                                                                                                                                                                                                                                                                              |                       |                         |              |      |            |      |           |                                                         |              |           |                   |     |         |              |
| Equation:                                                                         | At least 2 points are required to calculate regression.                                                                                                                                                                                                                                                                                                                                                                           |                       |                         |              |      |            |      |           |                                                         |              |           |                   |     |         |              |
| Area Counts:                                                                      | 4.74e+006                                                                                                                                                                                                                                                                                                                                                                                                                         |                       |                         |              |      |            |      |           |                                                         |              |           |                   |     |         |              |
| ISTD Area Counts:                                                                 | N/A                                                                                                                                                                                                                                                                                                                                                                                                                               |                       |                         |              |      |            |      |           |                                                         |              |           |                   |     |         |              |
| Amount:                                                                           | 0.00 (ng/mL)                                                                                                                                                                                                                                                                                                                                                                                                                      |                       |                         |              |      |            |      |           |                                                         |              |           |                   |     |         |              |
|  | <table> <tr> <td><b>Compound Name:</b></td><td>F4 (342.000/159.100 Da)</td></tr> <tr> <td>Expected RT:</td><td>25.8</td></tr> <tr> <td>Actual RT:</td><td>25.8</td></tr> <tr> <td>Equation:</td><td>At least 2 points are required to calculate regression.</td></tr> <tr> <td>Area Counts:</td><td>7.83e+006</td></tr> <tr> <td>ISTD Area Counts:</td><td>N/A</td></tr> <tr> <td>Amount:</td><td>0.00 (ng/mL)</td></tr> </table> | <b>Compound Name:</b> | F4 (342.000/159.100 Da) | Expected RT: | 25.8 | Actual RT: | 25.8 | Equation: | At least 2 points are required to calculate regression. | Area Counts: | 7.83e+006 | ISTD Area Counts: | N/A | Amount: | 0.00 (ng/mL) |
| <b>Compound Name:</b>                                                             | F4 (342.000/159.100 Da)                                                                                                                                                                                                                                                                                                                                                                                                           |                       |                         |              |      |            |      |           |                                                         |              |           |                   |     |         |              |
| Expected RT:                                                                      | 25.8                                                                                                                                                                                                                                                                                                                                                                                                                              |                       |                         |              |      |            |      |           |                                                         |              |           |                   |     |         |              |
| Actual RT:                                                                        | 25.8                                                                                                                                                                                                                                                                                                                                                                                                                              |                       |                         |              |      |            |      |           |                                                         |              |           |                   |     |         |              |
| Equation:                                                                         | At least 2 points are required to calculate regression.                                                                                                                                                                                                                                                                                                                                                                           |                       |                         |              |      |            |      |           |                                                         |              |           |                   |     |         |              |
| Area Counts:                                                                      | 7.83e+006                                                                                                                                                                                                                                                                                                                                                                                                                         |                       |                         |              |      |            |      |           |                                                         |              |           |                   |     |         |              |
| ISTD Area Counts:                                                                 | N/A                                                                                                                                                                                                                                                                                                                                                                                                                               |                       |                         |              |      |            |      |           |                                                         |              |           |                   |     |         |              |
| Amount:                                                                           | 0.00 (ng/mL)                                                                                                                                                                                                                                                                                                                                                                                                                      |                       |                         |              |      |            |      |           |                                                         |              |           |                   |     |         |              |

Figure S12 The LC chromatogram of plums treated with 0.020 a.i. g/L propiconazole at 10 d (20°C)



Figure Caption  
 Figure\_13\_SuppInfo.

|                           |                           |                          |                                      |
|---------------------------|---------------------------|--------------------------|--------------------------------------|
| <b>Data File</b>          | 20220820 BHZ-YP-20du.wiff | <b>Result Table</b>      | 20-0.02-15d-3.rdb                    |
| <b>Acquisition Date</b>   | 8/20/2022 11:22:24 PM     | <b>Algorithm Used</b>    | MQL                                  |
| <b>Acquisition Method</b> | BHZ method.dam            | <b>Instrument Name</b>   | AB SCIEX Triple Quad 4500            |
| <b>Project</b>            | DPY                       | <b>Processing Method</b> | <i>No data for Processing Method</i> |

Sample Name: 0.02-15d-3 Vial #: 27

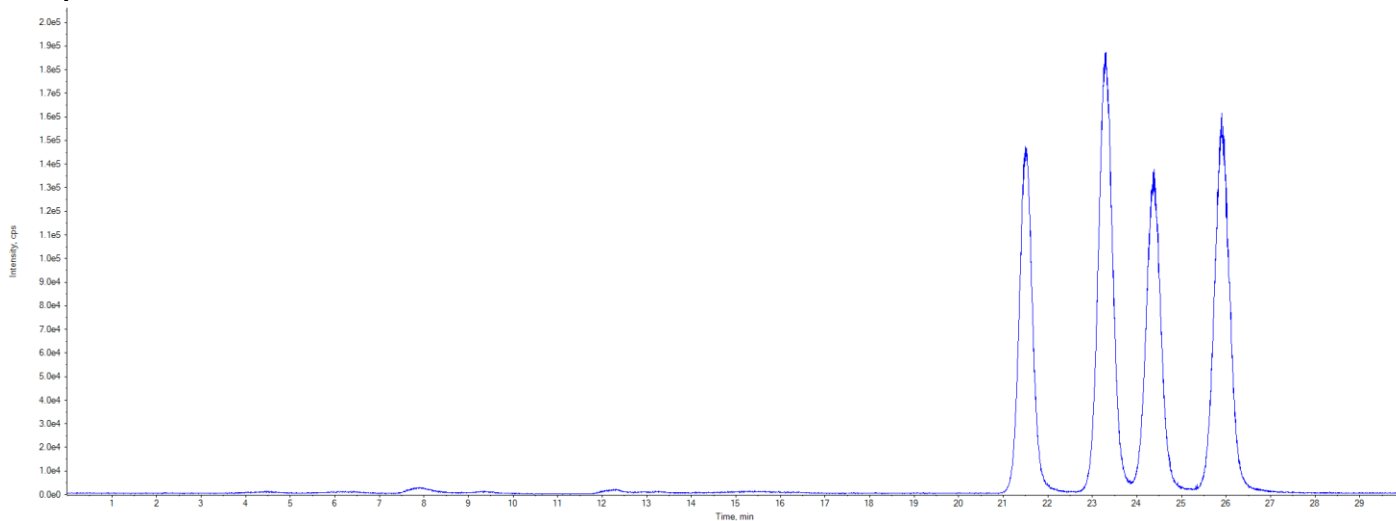

|                           |                                   |                         |                   |
|---------------------------|-----------------------------------|-------------------------|-------------------|
| <b>Sample Name</b>        | 0.02-15d-3                        | <b>Injection Vial</b>   | 27                |
| <b>Data File</b>          | 20220820 BHZ-YP-20du.wiff         | <b>Injection Volume</b> | 10                |
| <b>Acquisition Date</b>   | 8/20/2022 11:22:24 PM             | <b>Algorithm Used</b>   | MQL               |
| <b>Acquisition Method</b> | BHZ method.dam                    | <b>Sample Type</b>      | Unknown           |
| <b>Instrument Name</b>    | AB SCIEX Triple Quad 4500         | <b>Result Table</b>     | 20-0.02-15d-3.rdb |
| <b>Sample ID</b>          | <i>No data for Sample ID</i>      | <b>Dilution Factor</b>  | 1.00              |
| <b>Sample Comment</b>     | <i>No data for Sample Comment</i> | <b>Weight to Volume</b> | 0.00              |

Approved By (Date and Initials): \_\_\_\_\_.

|  |                       |                                                         |
|--|-----------------------|---------------------------------------------------------|
|  | <b>Compound Name:</b> | F1 (342.000/159.100 Da)                                 |
|  | Expected RT:          | 21.5                                                    |
|  | Actual RT:            | 21.5                                                    |
|  | Equation:             | At least 2 points are required to calculate regression. |
|  | Area Counts:          | 2.52e+006                                               |
|  | ISTD Area Counts:     | N/A                                                     |
|  | Amount:               | 0.00 (ng/mL)                                            |

|                                                                                   |                                                                                                                                                                                                                                                                                                                                                                                                                                   |                       |                         |              |      |            |      |           |                                                         |              |           |                   |     |         |              |
|-----------------------------------------------------------------------------------|-----------------------------------------------------------------------------------------------------------------------------------------------------------------------------------------------------------------------------------------------------------------------------------------------------------------------------------------------------------------------------------------------------------------------------------|-----------------------|-------------------------|--------------|------|------------|------|-----------|---------------------------------------------------------|--------------|-----------|-------------------|-----|---------|--------------|
| 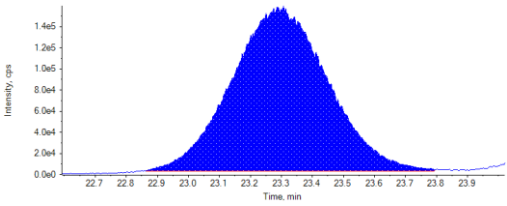 | <table> <tr> <td><b>Compound Name:</b></td><td>F2 (342.000/159.100 Da)</td></tr> <tr> <td>Expected RT:</td><td>23.3</td></tr> <tr> <td>Actual RT:</td><td>23.3</td></tr> <tr> <td>Equation:</td><td>At least 2 points are required to calculate regression.</td></tr> <tr> <td>Area Counts:</td><td>3.41e+006</td></tr> <tr> <td>ISTD Area Counts:</td><td>N/A</td></tr> <tr> <td>Amount:</td><td>0.00 (ng/mL)</td></tr> </table> | <b>Compound Name:</b> | F2 (342.000/159.100 Da) | Expected RT: | 23.3 | Actual RT: | 23.3 | Equation: | At least 2 points are required to calculate regression. | Area Counts: | 3.41e+006 | ISTD Area Counts: | N/A | Amount: | 0.00 (ng/mL) |
| <b>Compound Name:</b>                                                             | F2 (342.000/159.100 Da)                                                                                                                                                                                                                                                                                                                                                                                                           |                       |                         |              |      |            |      |           |                                                         |              |           |                   |     |         |              |
| Expected RT:                                                                      | 23.3                                                                                                                                                                                                                                                                                                                                                                                                                              |                       |                         |              |      |            |      |           |                                                         |              |           |                   |     |         |              |
| Actual RT:                                                                        | 23.3                                                                                                                                                                                                                                                                                                                                                                                                                              |                       |                         |              |      |            |      |           |                                                         |              |           |                   |     |         |              |
| Equation:                                                                         | At least 2 points are required to calculate regression.                                                                                                                                                                                                                                                                                                                                                                           |                       |                         |              |      |            |      |           |                                                         |              |           |                   |     |         |              |
| Area Counts:                                                                      | 3.41e+006                                                                                                                                                                                                                                                                                                                                                                                                                         |                       |                         |              |      |            |      |           |                                                         |              |           |                   |     |         |              |
| ISTD Area Counts:                                                                 | N/A                                                                                                                                                                                                                                                                                                                                                                                                                               |                       |                         |              |      |            |      |           |                                                         |              |           |                   |     |         |              |
| Amount:                                                                           | 0.00 (ng/mL)                                                                                                                                                                                                                                                                                                                                                                                                                      |                       |                         |              |      |            |      |           |                                                         |              |           |                   |     |         |              |
|  | <table> <tr> <td><b>Compound Name:</b></td><td>F3 (342.000/159.100 Da)</td></tr> <tr> <td>Expected RT:</td><td>24.4</td></tr> <tr> <td>Actual RT:</td><td>24.4</td></tr> <tr> <td>Equation:</td><td>At least 2 points are required to calculate regression.</td></tr> <tr> <td>Area Counts:</td><td>2.44e+006</td></tr> <tr> <td>ISTD Area Counts:</td><td>N/A</td></tr> <tr> <td>Amount:</td><td>0.00 (ng/mL)</td></tr> </table> | <b>Compound Name:</b> | F3 (342.000/159.100 Da) | Expected RT: | 24.4 | Actual RT: | 24.4 | Equation: | At least 2 points are required to calculate regression. | Area Counts: | 2.44e+006 | ISTD Area Counts: | N/A | Amount: | 0.00 (ng/mL) |
| <b>Compound Name:</b>                                                             | F3 (342.000/159.100 Da)                                                                                                                                                                                                                                                                                                                                                                                                           |                       |                         |              |      |            |      |           |                                                         |              |           |                   |     |         |              |
| Expected RT:                                                                      | 24.4                                                                                                                                                                                                                                                                                                                                                                                                                              |                       |                         |              |      |            |      |           |                                                         |              |           |                   |     |         |              |
| Actual RT:                                                                        | 24.4                                                                                                                                                                                                                                                                                                                                                                                                                              |                       |                         |              |      |            |      |           |                                                         |              |           |                   |     |         |              |
| Equation:                                                                         | At least 2 points are required to calculate regression.                                                                                                                                                                                                                                                                                                                                                                           |                       |                         |              |      |            |      |           |                                                         |              |           |                   |     |         |              |
| Area Counts:                                                                      | 2.44e+006                                                                                                                                                                                                                                                                                                                                                                                                                         |                       |                         |              |      |            |      |           |                                                         |              |           |                   |     |         |              |
| ISTD Area Counts:                                                                 | N/A                                                                                                                                                                                                                                                                                                                                                                                                                               |                       |                         |              |      |            |      |           |                                                         |              |           |                   |     |         |              |
| Amount:                                                                           | 0.00 (ng/mL)                                                                                                                                                                                                                                                                                                                                                                                                                      |                       |                         |              |      |            |      |           |                                                         |              |           |                   |     |         |              |
|  | <table> <tr> <td><b>Compound Name:</b></td><td>F4 (342.000/159.100 Da)</td></tr> <tr> <td>Expected RT:</td><td>25.9</td></tr> <tr> <td>Actual RT:</td><td>25.9</td></tr> <tr> <td>Equation:</td><td>At least 2 points are required to calculate regression.</td></tr> <tr> <td>Area Counts:</td><td>3.14e+006</td></tr> <tr> <td>ISTD Area Counts:</td><td>N/A</td></tr> <tr> <td>Amount:</td><td>0.00 (ng/mL)</td></tr> </table> | <b>Compound Name:</b> | F4 (342.000/159.100 Da) | Expected RT: | 25.9 | Actual RT: | 25.9 | Equation: | At least 2 points are required to calculate regression. | Area Counts: | 3.14e+006 | ISTD Area Counts: | N/A | Amount: | 0.00 (ng/mL) |
| <b>Compound Name:</b>                                                             | F4 (342.000/159.100 Da)                                                                                                                                                                                                                                                                                                                                                                                                           |                       |                         |              |      |            |      |           |                                                         |              |           |                   |     |         |              |
| Expected RT:                                                                      | 25.9                                                                                                                                                                                                                                                                                                                                                                                                                              |                       |                         |              |      |            |      |           |                                                         |              |           |                   |     |         |              |
| Actual RT:                                                                        | 25.9                                                                                                                                                                                                                                                                                                                                                                                                                              |                       |                         |              |      |            |      |           |                                                         |              |           |                   |     |         |              |
| Equation:                                                                         | At least 2 points are required to calculate regression.                                                                                                                                                                                                                                                                                                                                                                           |                       |                         |              |      |            |      |           |                                                         |              |           |                   |     |         |              |
| Area Counts:                                                                      | 3.14e+006                                                                                                                                                                                                                                                                                                                                                                                                                         |                       |                         |              |      |            |      |           |                                                         |              |           |                   |     |         |              |
| ISTD Area Counts:                                                                 | N/A                                                                                                                                                                                                                                                                                                                                                                                                                               |                       |                         |              |      |            |      |           |                                                         |              |           |                   |     |         |              |
| Amount:                                                                           | 0.00 (ng/mL)                                                                                                                                                                                                                                                                                                                                                                                                                      |                       |                         |              |      |            |      |           |                                                         |              |           |                   |     |         |              |

Figure S13 The LC chromatogram of plums treated with 0.020 a.i. g/L propiconazole at 15 d (20°C)



Figure Caption  
 Figure\_14\_SuppInfo.

|                           |                           |                          |                                      |
|---------------------------|---------------------------|--------------------------|--------------------------------------|
| <b>Data File</b>          | 20220820 BHZ-YP-20du.wiff | <b>Result Table</b>      | 20-0.02-20d-1.rdb                    |
| <b>Acquisition Date</b>   | 8/20/2022 8:45:06 PM      | <b>Algorithm Used</b>    | MQL                                  |
| <b>Acquisition Method</b> | BHZ method.dam            | <b>Instrument Name</b>   | AB SCIEX Triple Quad 4500            |
| <b>Project</b>            | DPY                       | <b>Processing Method</b> | <i>No data for Processing Method</i> |

**Sample Name:** 0.02-20d-1 **Vial #:** 22

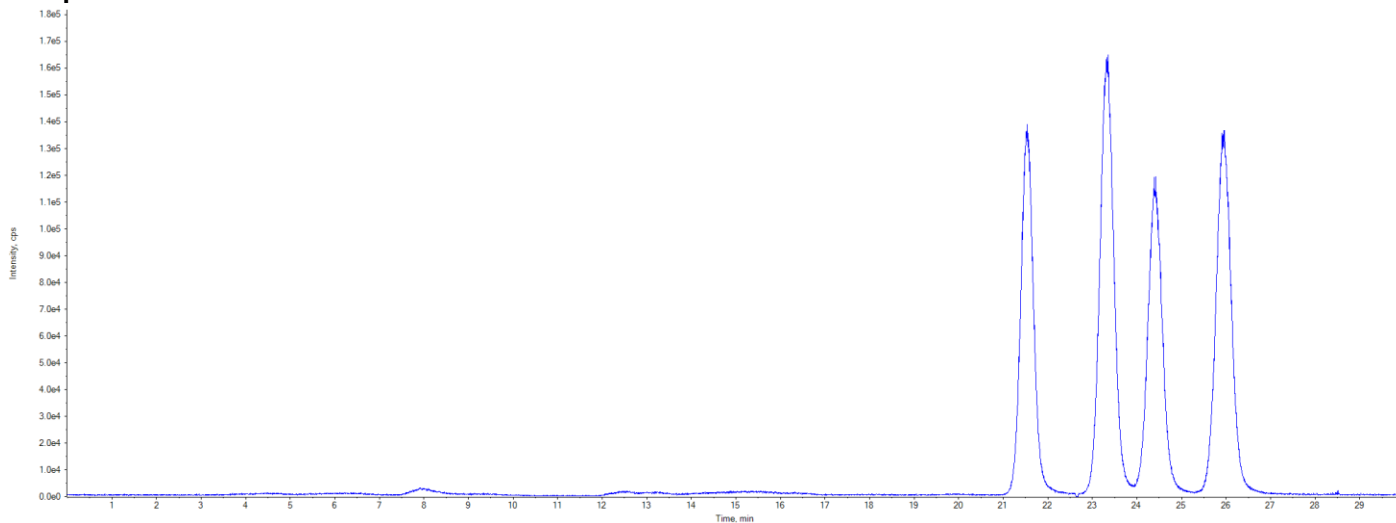

|                           |                                   |                         |                   |
|---------------------------|-----------------------------------|-------------------------|-------------------|
| <b>Sample Name</b>        | 0.02-20d-1                        | <b>Injection Vial</b>   | 22                |
| <b>Data File</b>          | 20220820 BHZ-YP-20du.wiff         | <b>Injection Volume</b> | 10                |
| <b>Acquisition Date</b>   | 8/20/2022 8:45:06 PM              | <b>Algorithm Used</b>   | MQL               |
| <b>Acquisition Method</b> | BHZ method.dam                    | <b>Sample Type</b>      | Unknown           |
| <b>Instrument Name</b>    | AB SCIEX Triple Quad 4500         | <b>Result Table</b>     | 20-0.02-20d-1.rdb |
| <b>Sample ID</b>          | <i>No data for Sample ID</i>      | <b>Dilution Factor</b>  | 1.00              |
| <b>Sample Comment</b>     | <i>No data for Sample Comment</i> | <b>Weight to Volume</b> | 0.00              |

Approved By (Date and Initials): \_\_\_\_\_.

|  |                       |                                                         |
|--|-----------------------|---------------------------------------------------------|
|  | <b>Compound Name:</b> | F1 (342.000/159.100 Da)                                 |
|  | Expected RT:          | 21.5                                                    |
|  | Actual RT:            | 21.5                                                    |
|  | Equation:             | At least 2 points are required to calculate regression. |
|  | Area Counts:          | 2.25e+006                                               |
|  | ISTD Area Counts:     | N/A                                                     |
|  | Amount:               | 0.00 (ng/mL)                                            |

|                                                                                   |                                                                                                                                                                                                                                                                                                                                                                                                                                          |                       |                                |              |      |            |      |           |                                                         |              |           |                   |     |         |              |
|-----------------------------------------------------------------------------------|------------------------------------------------------------------------------------------------------------------------------------------------------------------------------------------------------------------------------------------------------------------------------------------------------------------------------------------------------------------------------------------------------------------------------------------|-----------------------|--------------------------------|--------------|------|------------|------|-----------|---------------------------------------------------------|--------------|-----------|-------------------|-----|---------|--------------|
| 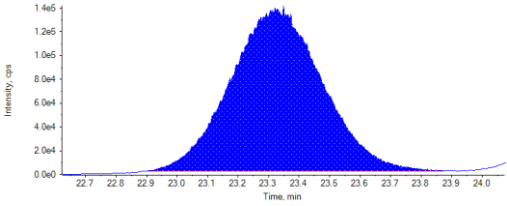 | <table> <tr> <td><b>Compound Name:</b></td><td><b>F2 (342.000/159.100 Da)</b></td></tr> <tr> <td>Expected RT:</td><td>23.3</td></tr> <tr> <td>Actual RT:</td><td>23.3</td></tr> <tr> <td>Equation:</td><td>At least 2 points are required to calculate regression.</td></tr> <tr> <td>Area Counts:</td><td>2.93e+006</td></tr> <tr> <td>ISTD Area Counts:</td><td>N/A</td></tr> <tr> <td>Amount:</td><td>0.00 (ng/mL)</td></tr> </table> | <b>Compound Name:</b> | <b>F2 (342.000/159.100 Da)</b> | Expected RT: | 23.3 | Actual RT: | 23.3 | Equation: | At least 2 points are required to calculate regression. | Area Counts: | 2.93e+006 | ISTD Area Counts: | N/A | Amount: | 0.00 (ng/mL) |
| <b>Compound Name:</b>                                                             | <b>F2 (342.000/159.100 Da)</b>                                                                                                                                                                                                                                                                                                                                                                                                           |                       |                                |              |      |            |      |           |                                                         |              |           |                   |     |         |              |
| Expected RT:                                                                      | 23.3                                                                                                                                                                                                                                                                                                                                                                                                                                     |                       |                                |              |      |            |      |           |                                                         |              |           |                   |     |         |              |
| Actual RT:                                                                        | 23.3                                                                                                                                                                                                                                                                                                                                                                                                                                     |                       |                                |              |      |            |      |           |                                                         |              |           |                   |     |         |              |
| Equation:                                                                         | At least 2 points are required to calculate regression.                                                                                                                                                                                                                                                                                                                                                                                  |                       |                                |              |      |            |      |           |                                                         |              |           |                   |     |         |              |
| Area Counts:                                                                      | 2.93e+006                                                                                                                                                                                                                                                                                                                                                                                                                                |                       |                                |              |      |            |      |           |                                                         |              |           |                   |     |         |              |
| ISTD Area Counts:                                                                 | N/A                                                                                                                                                                                                                                                                                                                                                                                                                                      |                       |                                |              |      |            |      |           |                                                         |              |           |                   |     |         |              |
| Amount:                                                                           | 0.00 (ng/mL)                                                                                                                                                                                                                                                                                                                                                                                                                             |                       |                                |              |      |            |      |           |                                                         |              |           |                   |     |         |              |
|  | <table> <tr> <td><b>Compound Name:</b></td><td><b>F3 (342.000/159.100 Da)</b></td></tr> <tr> <td>Expected RT:</td><td>24.4</td></tr> <tr> <td>Actual RT:</td><td>24.4</td></tr> <tr> <td>Equation:</td><td>At least 2 points are required to calculate regression.</td></tr> <tr> <td>Area Counts:</td><td>2.08e+006</td></tr> <tr> <td>ISTD Area Counts:</td><td>N/A</td></tr> <tr> <td>Amount:</td><td>0.00 (ng/mL)</td></tr> </table> | <b>Compound Name:</b> | <b>F3 (342.000/159.100 Da)</b> | Expected RT: | 24.4 | Actual RT: | 24.4 | Equation: | At least 2 points are required to calculate regression. | Area Counts: | 2.08e+006 | ISTD Area Counts: | N/A | Amount: | 0.00 (ng/mL) |
| <b>Compound Name:</b>                                                             | <b>F3 (342.000/159.100 Da)</b>                                                                                                                                                                                                                                                                                                                                                                                                           |                       |                                |              |      |            |      |           |                                                         |              |           |                   |     |         |              |
| Expected RT:                                                                      | 24.4                                                                                                                                                                                                                                                                                                                                                                                                                                     |                       |                                |              |      |            |      |           |                                                         |              |           |                   |     |         |              |
| Actual RT:                                                                        | 24.4                                                                                                                                                                                                                                                                                                                                                                                                                                     |                       |                                |              |      |            |      |           |                                                         |              |           |                   |     |         |              |
| Equation:                                                                         | At least 2 points are required to calculate regression.                                                                                                                                                                                                                                                                                                                                                                                  |                       |                                |              |      |            |      |           |                                                         |              |           |                   |     |         |              |
| Area Counts:                                                                      | 2.08e+006                                                                                                                                                                                                                                                                                                                                                                                                                                |                       |                                |              |      |            |      |           |                                                         |              |           |                   |     |         |              |
| ISTD Area Counts:                                                                 | N/A                                                                                                                                                                                                                                                                                                                                                                                                                                      |                       |                                |              |      |            |      |           |                                                         |              |           |                   |     |         |              |
| Amount:                                                                           | 0.00 (ng/mL)                                                                                                                                                                                                                                                                                                                                                                                                                             |                       |                                |              |      |            |      |           |                                                         |              |           |                   |     |         |              |
|  | <table> <tr> <td><b>Compound Name:</b></td><td><b>F4 (342.000/159.100 Da)</b></td></tr> <tr> <td>Expected RT:</td><td>26.0</td></tr> <tr> <td>Actual RT:</td><td>26.0</td></tr> <tr> <td>Equation:</td><td>At least 2 points are required to calculate regression.</td></tr> <tr> <td>Area Counts:</td><td>2.73e+006</td></tr> <tr> <td>ISTD Area Counts:</td><td>N/A</td></tr> <tr> <td>Amount:</td><td>0.00 (ng/mL)</td></tr> </table> | <b>Compound Name:</b> | <b>F4 (342.000/159.100 Da)</b> | Expected RT: | 26.0 | Actual RT: | 26.0 | Equation: | At least 2 points are required to calculate regression. | Area Counts: | 2.73e+006 | ISTD Area Counts: | N/A | Amount: | 0.00 (ng/mL) |
| <b>Compound Name:</b>                                                             | <b>F4 (342.000/159.100 Da)</b>                                                                                                                                                                                                                                                                                                                                                                                                           |                       |                                |              |      |            |      |           |                                                         |              |           |                   |     |         |              |
| Expected RT:                                                                      | 26.0                                                                                                                                                                                                                                                                                                                                                                                                                                     |                       |                                |              |      |            |      |           |                                                         |              |           |                   |     |         |              |
| Actual RT:                                                                        | 26.0                                                                                                                                                                                                                                                                                                                                                                                                                                     |                       |                                |              |      |            |      |           |                                                         |              |           |                   |     |         |              |
| Equation:                                                                         | At least 2 points are required to calculate regression.                                                                                                                                                                                                                                                                                                                                                                                  |                       |                                |              |      |            |      |           |                                                         |              |           |                   |     |         |              |
| Area Counts:                                                                      | 2.73e+006                                                                                                                                                                                                                                                                                                                                                                                                                                |                       |                                |              |      |            |      |           |                                                         |              |           |                   |     |         |              |
| ISTD Area Counts:                                                                 | N/A                                                                                                                                                                                                                                                                                                                                                                                                                                      |                       |                                |              |      |            |      |           |                                                         |              |           |                   |     |         |              |
| Amount:                                                                           | 0.00 (ng/mL)                                                                                                                                                                                                                                                                                                                                                                                                                             |                       |                                |              |      |            |      |           |                                                         |              |           |                   |     |         |              |

Figure S14 The LC chromatogram of plums treated with 0.020 a.i. g/L propiconazole at 20 d (20°C)



Figure Caption  
 Figure\_15\_SuppInfo.

|                           |                           |                          |                                      |
|---------------------------|---------------------------|--------------------------|--------------------------------------|
| <b>Data File</b>          | 20220820 BHZ-YP-20du.wiff | <b>Result Table</b>      | 20-0.02-25d-2.rdb                    |
| <b>Acquisition Date</b>   | 8/20/2022 7:42:11 PM      | <b>Algorithm Used</b>    | MQL                                  |
| <b>Acquisition Method</b> | BHZ method.dam            | <b>Instrument Name</b>   | AB SCIEX Triple Quad 4500            |
| <b>Project</b>            | DPY                       | <b>Processing Method</b> | <i>No data for Processing Method</i> |

**Sample Name:** 0.02-25d-2 **Vial #:** 20

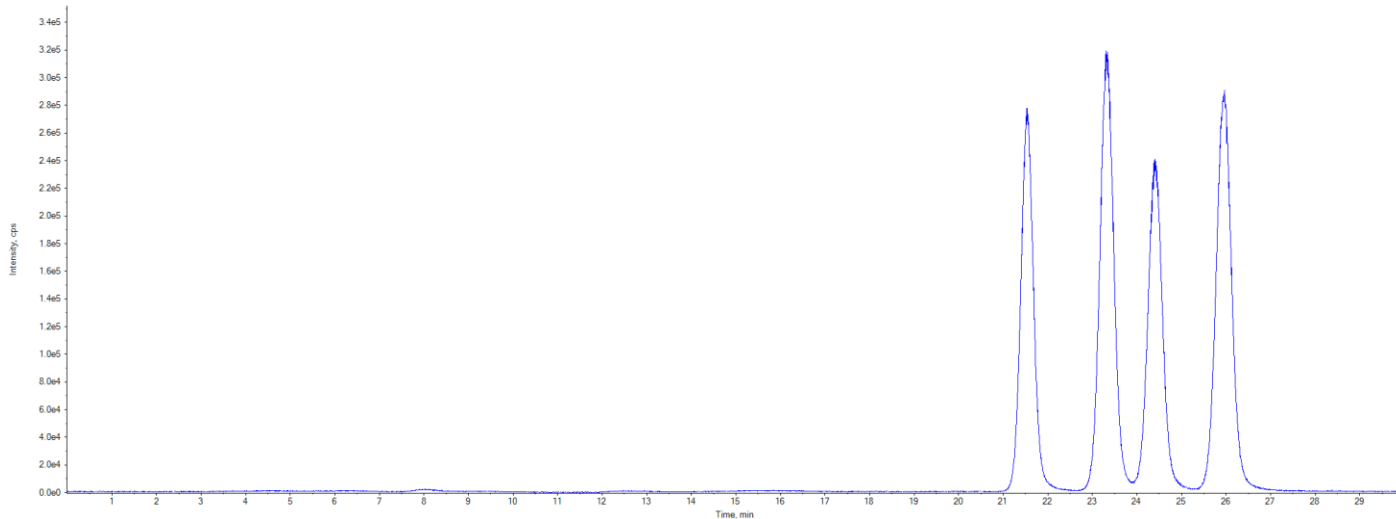

|                           |                                   |                         |                   |
|---------------------------|-----------------------------------|-------------------------|-------------------|
| <b>Sample Name</b>        | 0.02-25d-2                        | <b>Injection Vial</b>   | 20                |
| <b>Data File</b>          | 20220820 BHZ-YP-20du.wiff         | <b>Injection Volume</b> | 10                |
| <b>Acquisition Date</b>   | 8/20/2022 7:42:11 PM              | <b>Algorithm Used</b>   | MQL               |
| <b>Acquisition Method</b> | BHZ method.dam                    | <b>Sample Type</b>      | Unknown           |
| <b>Instrument Name</b>    | AB SCIEX Triple Quad 4500         | <b>Result Table</b>     | 20-0.02-25d-2.rdb |
| <b>Sample ID</b>          | <i>No data for Sample ID</i>      | <b>Dilution Factor</b>  | 1.00              |
| <b>Sample Comment</b>     | <i>No data for Sample Comment</i> | <b>Weight to Volume</b> | 0.00              |

Approved By (Date and Initials): \_\_\_\_\_.

|                                                                                                                                                                                |                       |                                                         |
|--------------------------------------------------------------------------------------------------------------------------------------------------------------------------------|-----------------------|---------------------------------------------------------|
| <p>The zoomed-in peak shows a single, symmetric peak centered at 21.5 minutes. The x-axis ranges from 20.9 to 22.2 minutes, and the y-axis ranges from 0.0e0 to 2.0e5 cps.</p> | <b>Compound Name:</b> | F1 (342.000/159.100 Da)                                 |
|                                                                                                                                                                                | Expected RT:          | 21.5                                                    |
|                                                                                                                                                                                | Actual RT:            | 21.5                                                    |
|                                                                                                                                                                                | Equation:             | At least 2 points are required to calculate regression. |
|                                                                                                                                                                                | Area Counts:          | 4.54e+006                                               |
|                                                                                                                                                                                | ISTD Area Counts:     | N/A                                                     |
|                                                                                                                                                                                | Amount:               | 0.00 (ng/mL)                                            |

|                                                                                   |                                                                                                                                                                                                                                                                                                                                                                                                                                          |                       |                                |              |      |            |      |           |                                                         |              |           |                   |     |         |              |
|-----------------------------------------------------------------------------------|------------------------------------------------------------------------------------------------------------------------------------------------------------------------------------------------------------------------------------------------------------------------------------------------------------------------------------------------------------------------------------------------------------------------------------------|-----------------------|--------------------------------|--------------|------|------------|------|-----------|---------------------------------------------------------|--------------|-----------|-------------------|-----|---------|--------------|
| 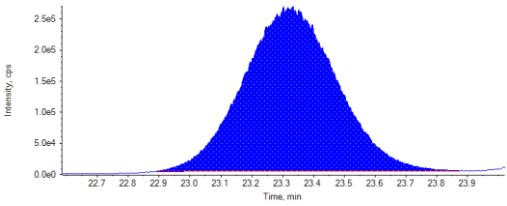 | <table> <tr> <td><b>Compound Name:</b></td><td><b>F2 (342.000/159.100 Da)</b></td></tr> <tr> <td>Expected RT:</td><td>23.3</td></tr> <tr> <td>Actual RT:</td><td>23.3</td></tr> <tr> <td>Equation:</td><td>At least 2 points are required to calculate regression.</td></tr> <tr> <td>Area Counts:</td><td>5.68e+006</td></tr> <tr> <td>ISTD Area Counts:</td><td>N/A</td></tr> <tr> <td>Amount:</td><td>0.00 (ng/mL)</td></tr> </table> | <b>Compound Name:</b> | <b>F2 (342.000/159.100 Da)</b> | Expected RT: | 23.3 | Actual RT: | 23.3 | Equation: | At least 2 points are required to calculate regression. | Area Counts: | 5.68e+006 | ISTD Area Counts: | N/A | Amount: | 0.00 (ng/mL) |
| <b>Compound Name:</b>                                                             | <b>F2 (342.000/159.100 Da)</b>                                                                                                                                                                                                                                                                                                                                                                                                           |                       |                                |              |      |            |      |           |                                                         |              |           |                   |     |         |              |
| Expected RT:                                                                      | 23.3                                                                                                                                                                                                                                                                                                                                                                                                                                     |                       |                                |              |      |            |      |           |                                                         |              |           |                   |     |         |              |
| Actual RT:                                                                        | 23.3                                                                                                                                                                                                                                                                                                                                                                                                                                     |                       |                                |              |      |            |      |           |                                                         |              |           |                   |     |         |              |
| Equation:                                                                         | At least 2 points are required to calculate regression.                                                                                                                                                                                                                                                                                                                                                                                  |                       |                                |              |      |            |      |           |                                                         |              |           |                   |     |         |              |
| Area Counts:                                                                      | 5.68e+006                                                                                                                                                                                                                                                                                                                                                                                                                                |                       |                                |              |      |            |      |           |                                                         |              |           |                   |     |         |              |
| ISTD Area Counts:                                                                 | N/A                                                                                                                                                                                                                                                                                                                                                                                                                                      |                       |                                |              |      |            |      |           |                                                         |              |           |                   |     |         |              |
| Amount:                                                                           | 0.00 (ng/mL)                                                                                                                                                                                                                                                                                                                                                                                                                             |                       |                                |              |      |            |      |           |                                                         |              |           |                   |     |         |              |
|  | <table> <tr> <td><b>Compound Name:</b></td><td><b>F3 (342.000/159.100 Da)</b></td></tr> <tr> <td>Expected RT:</td><td>24.4</td></tr> <tr> <td>Actual RT:</td><td>24.4</td></tr> <tr> <td>Equation:</td><td>At least 2 points are required to calculate regression.</td></tr> <tr> <td>Area Counts:</td><td>4.33e+006</td></tr> <tr> <td>ISTD Area Counts:</td><td>N/A</td></tr> <tr> <td>Amount:</td><td>0.00 (ng/mL)</td></tr> </table> | <b>Compound Name:</b> | <b>F3 (342.000/159.100 Da)</b> | Expected RT: | 24.4 | Actual RT: | 24.4 | Equation: | At least 2 points are required to calculate regression. | Area Counts: | 4.33e+006 | ISTD Area Counts: | N/A | Amount: | 0.00 (ng/mL) |
| <b>Compound Name:</b>                                                             | <b>F3 (342.000/159.100 Da)</b>                                                                                                                                                                                                                                                                                                                                                                                                           |                       |                                |              |      |            |      |           |                                                         |              |           |                   |     |         |              |
| Expected RT:                                                                      | 24.4                                                                                                                                                                                                                                                                                                                                                                                                                                     |                       |                                |              |      |            |      |           |                                                         |              |           |                   |     |         |              |
| Actual RT:                                                                        | 24.4                                                                                                                                                                                                                                                                                                                                                                                                                                     |                       |                                |              |      |            |      |           |                                                         |              |           |                   |     |         |              |
| Equation:                                                                         | At least 2 points are required to calculate regression.                                                                                                                                                                                                                                                                                                                                                                                  |                       |                                |              |      |            |      |           |                                                         |              |           |                   |     |         |              |
| Area Counts:                                                                      | 4.33e+006                                                                                                                                                                                                                                                                                                                                                                                                                                |                       |                                |              |      |            |      |           |                                                         |              |           |                   |     |         |              |
| ISTD Area Counts:                                                                 | N/A                                                                                                                                                                                                                                                                                                                                                                                                                                      |                       |                                |              |      |            |      |           |                                                         |              |           |                   |     |         |              |
| Amount:                                                                           | 0.00 (ng/mL)                                                                                                                                                                                                                                                                                                                                                                                                                             |                       |                                |              |      |            |      |           |                                                         |              |           |                   |     |         |              |
|  | <table> <tr> <td><b>Compound Name:</b></td><td><b>F4 (342.000/159.100 Da)</b></td></tr> <tr> <td>Expected RT:</td><td>26.0</td></tr> <tr> <td>Actual RT:</td><td>26.0</td></tr> <tr> <td>Equation:</td><td>At least 2 points are required to calculate regression.</td></tr> <tr> <td>Area Counts:</td><td>5.87e+006</td></tr> <tr> <td>ISTD Area Counts:</td><td>N/A</td></tr> <tr> <td>Amount:</td><td>0.00 (ng/mL)</td></tr> </table> | <b>Compound Name:</b> | <b>F4 (342.000/159.100 Da)</b> | Expected RT: | 26.0 | Actual RT: | 26.0 | Equation: | At least 2 points are required to calculate regression. | Area Counts: | 5.87e+006 | ISTD Area Counts: | N/A | Amount: | 0.00 (ng/mL) |
| <b>Compound Name:</b>                                                             | <b>F4 (342.000/159.100 Da)</b>                                                                                                                                                                                                                                                                                                                                                                                                           |                       |                                |              |      |            |      |           |                                                         |              |           |                   |     |         |              |
| Expected RT:                                                                      | 26.0                                                                                                                                                                                                                                                                                                                                                                                                                                     |                       |                                |              |      |            |      |           |                                                         |              |           |                   |     |         |              |
| Actual RT:                                                                        | 26.0                                                                                                                                                                                                                                                                                                                                                                                                                                     |                       |                                |              |      |            |      |           |                                                         |              |           |                   |     |         |              |
| Equation:                                                                         | At least 2 points are required to calculate regression.                                                                                                                                                                                                                                                                                                                                                                                  |                       |                                |              |      |            |      |           |                                                         |              |           |                   |     |         |              |
| Area Counts:                                                                      | 5.87e+006                                                                                                                                                                                                                                                                                                                                                                                                                                |                       |                                |              |      |            |      |           |                                                         |              |           |                   |     |         |              |
| ISTD Area Counts:                                                                 | N/A                                                                                                                                                                                                                                                                                                                                                                                                                                      |                       |                                |              |      |            |      |           |                                                         |              |           |                   |     |         |              |
| Amount:                                                                           | 0.00 (ng/mL)                                                                                                                                                                                                                                                                                                                                                                                                                             |                       |                                |              |      |            |      |           |                                                         |              |           |                   |     |         |              |

Figure S15 The LC chromatogram of plums treated with 0.020 a.i. g/L propiconazole at 25 d (20°C)



Figure Caption  
 Figure\_16\_SuppInfo.

|                           |                           |                          |                                      |
|---------------------------|---------------------------|--------------------------|--------------------------------------|
| <b>Data File</b>          | 20220820 BHZ-YP-20du.wiff | <b>Result Table</b>      | 20-0.02-30d-2.rdb                    |
| <b>Acquisition Date</b>   | 8/20/2022 6:07:48 PM      | <b>Algorithm Used</b>    | MQL                                  |
| <b>Acquisition Method</b> | BHZ method.dam            | <b>Instrument Name</b>   | AB SCIEX Triple Quad 4500            |
| <b>Project</b>            | DPY                       | <b>Processing Method</b> | <i>No data for Processing Method</i> |

**Sample Name:** 0.02-30d-2 **Vial #:** 17

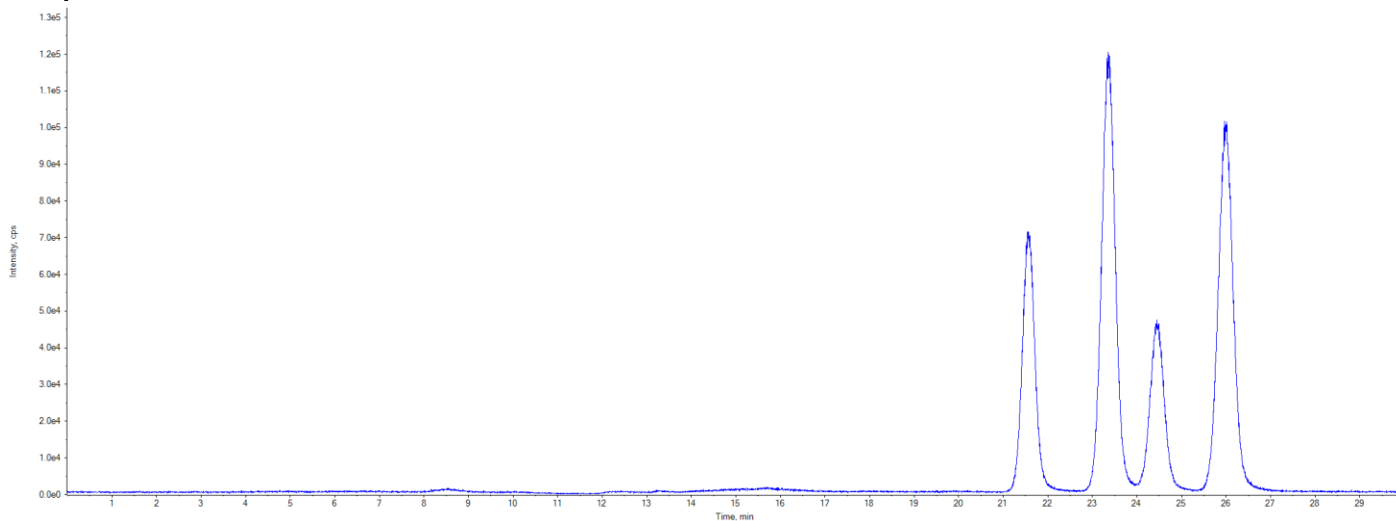

|                           |                                   |                         |                   |
|---------------------------|-----------------------------------|-------------------------|-------------------|
| <b>Sample Name</b>        | 0.02-30d-2                        | <b>Injection Vial</b>   | 17                |
| <b>Data File</b>          | 20220820 BHZ-YP-20du.wiff         | <b>Injection Volume</b> | 10                |
| <b>Acquisition Date</b>   | 8/20/2022 6:07:48 PM              | <b>Algorithm Used</b>   | MQL               |
| <b>Acquisition Method</b> | BHZ method.dam                    | <b>Sample Type</b>      | Unknown           |
| <b>Instrument Name</b>    | AB SCIEX Triple Quad 4500         | <b>Result Table</b>     | 20-0.02-30d-2.rdb |
| <b>Sample ID</b>          | <i>No data for Sample ID</i>      | <b>Dilution Factor</b>  | 1.00              |
| <b>Sample Comment</b>     | <i>No data for Sample Comment</i> | <b>Weight to Volume</b> | 0.00              |

Approved By (Date and Initials): \_\_\_\_\_.

|  |                       |                                                         |
|--|-----------------------|---------------------------------------------------------|
|  | <b>Compound Name:</b> | F1 (342.000/159.100 Da)                                 |
|  | Expected RT:          | 21.5                                                    |
|  | Actual RT:            | 21.5                                                    |
|  | Equation:             | At least 2 points are required to calculate regression. |
|  | Area Counts:          | 1.18e+006                                               |
|  | ISTD Area Counts:     | N/A                                                     |
|  | Amount:               | 0.00 (ng/mL)                                            |



|                                                                                   |                                                                                                                                                                                                                                                                                                                                                                                                                                   |                       |                         |              |      |            |      |           |                                                         |              |           |                   |     |         |              |
|-----------------------------------------------------------------------------------|-----------------------------------------------------------------------------------------------------------------------------------------------------------------------------------------------------------------------------------------------------------------------------------------------------------------------------------------------------------------------------------------------------------------------------------|-----------------------|-------------------------|--------------|------|------------|------|-----------|---------------------------------------------------------|--------------|-----------|-------------------|-----|---------|--------------|
| 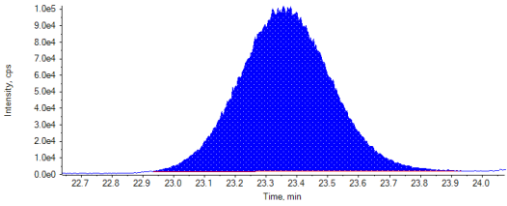 | <table> <tr> <td><b>Compound Name:</b></td><td>F2 (342.000/159.100 Da)</td></tr> <tr> <td>Expected RT:</td><td>23.4</td></tr> <tr> <td>Actual RT:</td><td>23.4</td></tr> <tr> <td>Equation:</td><td>At least 2 points are required to calculate regression.</td></tr> <tr> <td>Area Counts:</td><td>2.12e+006</td></tr> <tr> <td>ISTD Area Counts:</td><td>N/A</td></tr> <tr> <td>Amount:</td><td>0.00 (ng/mL)</td></tr> </table> | <b>Compound Name:</b> | F2 (342.000/159.100 Da) | Expected RT: | 23.4 | Actual RT: | 23.4 | Equation: | At least 2 points are required to calculate regression. | Area Counts: | 2.12e+006 | ISTD Area Counts: | N/A | Amount: | 0.00 (ng/mL) |
| <b>Compound Name:</b>                                                             | F2 (342.000/159.100 Da)                                                                                                                                                                                                                                                                                                                                                                                                           |                       |                         |              |      |            |      |           |                                                         |              |           |                   |     |         |              |
| Expected RT:                                                                      | 23.4                                                                                                                                                                                                                                                                                                                                                                                                                              |                       |                         |              |      |            |      |           |                                                         |              |           |                   |     |         |              |
| Actual RT:                                                                        | 23.4                                                                                                                                                                                                                                                                                                                                                                                                                              |                       |                         |              |      |            |      |           |                                                         |              |           |                   |     |         |              |
| Equation:                                                                         | At least 2 points are required to calculate regression.                                                                                                                                                                                                                                                                                                                                                                           |                       |                         |              |      |            |      |           |                                                         |              |           |                   |     |         |              |
| Area Counts:                                                                      | 2.12e+006                                                                                                                                                                                                                                                                                                                                                                                                                         |                       |                         |              |      |            |      |           |                                                         |              |           |                   |     |         |              |
| ISTD Area Counts:                                                                 | N/A                                                                                                                                                                                                                                                                                                                                                                                                                               |                       |                         |              |      |            |      |           |                                                         |              |           |                   |     |         |              |
| Amount:                                                                           | 0.00 (ng/mL)                                                                                                                                                                                                                                                                                                                                                                                                                      |                       |                         |              |      |            |      |           |                                                         |              |           |                   |     |         |              |
|  | <table> <tr> <td><b>Compound Name:</b></td><td>F3 (342.000/159.100 Da)</td></tr> <tr> <td>Expected RT:</td><td>24.5</td></tr> <tr> <td>Actual RT:</td><td>24.5</td></tr> <tr> <td>Equation:</td><td>At least 2 points are required to calculate regression.</td></tr> <tr> <td>Area Counts:</td><td>8.11e+005</td></tr> <tr> <td>ISTD Area Counts:</td><td>N/A</td></tr> <tr> <td>Amount:</td><td>0.00 (ng/mL)</td></tr> </table> | <b>Compound Name:</b> | F3 (342.000/159.100 Da) | Expected RT: | 24.5 | Actual RT: | 24.5 | Equation: | At least 2 points are required to calculate regression. | Area Counts: | 8.11e+005 | ISTD Area Counts: | N/A | Amount: | 0.00 (ng/mL) |
| <b>Compound Name:</b>                                                             | F3 (342.000/159.100 Da)                                                                                                                                                                                                                                                                                                                                                                                                           |                       |                         |              |      |            |      |           |                                                         |              |           |                   |     |         |              |
| Expected RT:                                                                      | 24.5                                                                                                                                                                                                                                                                                                                                                                                                                              |                       |                         |              |      |            |      |           |                                                         |              |           |                   |     |         |              |
| Actual RT:                                                                        | 24.5                                                                                                                                                                                                                                                                                                                                                                                                                              |                       |                         |              |      |            |      |           |                                                         |              |           |                   |     |         |              |
| Equation:                                                                         | At least 2 points are required to calculate regression.                                                                                                                                                                                                                                                                                                                                                                           |                       |                         |              |      |            |      |           |                                                         |              |           |                   |     |         |              |
| Area Counts:                                                                      | 8.11e+005                                                                                                                                                                                                                                                                                                                                                                                                                         |                       |                         |              |      |            |      |           |                                                         |              |           |                   |     |         |              |
| ISTD Area Counts:                                                                 | N/A                                                                                                                                                                                                                                                                                                                                                                                                                               |                       |                         |              |      |            |      |           |                                                         |              |           |                   |     |         |              |
| Amount:                                                                           | 0.00 (ng/mL)                                                                                                                                                                                                                                                                                                                                                                                                                      |                       |                         |              |      |            |      |           |                                                         |              |           |                   |     |         |              |
|  | <table> <tr> <td><b>Compound Name:</b></td><td>F4 (342.000/159.100 Da)</td></tr> <tr> <td>Expected RT:</td><td>26.0</td></tr> <tr> <td>Actual RT:</td><td>26.0</td></tr> <tr> <td>Equation:</td><td>At least 2 points are required to calculate regression.</td></tr> <tr> <td>Area Counts:</td><td>2.00e+006</td></tr> <tr> <td>ISTD Area Counts:</td><td>N/A</td></tr> <tr> <td>Amount:</td><td>0.00 (ng/mL)</td></tr> </table> | <b>Compound Name:</b> | F4 (342.000/159.100 Da) | Expected RT: | 26.0 | Actual RT: | 26.0 | Equation: | At least 2 points are required to calculate regression. | Area Counts: | 2.00e+006 | ISTD Area Counts: | N/A | Amount: | 0.00 (ng/mL) |
| <b>Compound Name:</b>                                                             | F4 (342.000/159.100 Da)                                                                                                                                                                                                                                                                                                                                                                                                           |                       |                         |              |      |            |      |           |                                                         |              |           |                   |     |         |              |
| Expected RT:                                                                      | 26.0                                                                                                                                                                                                                                                                                                                                                                                                                              |                       |                         |              |      |            |      |           |                                                         |              |           |                   |     |         |              |
| Actual RT:                                                                        | 26.0                                                                                                                                                                                                                                                                                                                                                                                                                              |                       |                         |              |      |            |      |           |                                                         |              |           |                   |     |         |              |
| Equation:                                                                         | At least 2 points are required to calculate regression.                                                                                                                                                                                                                                                                                                                                                                           |                       |                         |              |      |            |      |           |                                                         |              |           |                   |     |         |              |
| Area Counts:                                                                      | 2.00e+006                                                                                                                                                                                                                                                                                                                                                                                                                         |                       |                         |              |      |            |      |           |                                                         |              |           |                   |     |         |              |
| ISTD Area Counts:                                                                 | N/A                                                                                                                                                                                                                                                                                                                                                                                                                               |                       |                         |              |      |            |      |           |                                                         |              |           |                   |     |         |              |
| Amount:                                                                           | 0.00 (ng/mL)                                                                                                                                                                                                                                                                                                                                                                                                                      |                       |                         |              |      |            |      |           |                                                         |              |           |                   |     |         |              |

Figure S16 The LC chromatogram of plums treated with 0.020 a.i. g/L propiconazole at 30 d (20°C)



Figure Caption  
 Figure\_17\_SuppInfo.

|                           |                          |                          |                                      |
|---------------------------|--------------------------|--------------------------|--------------------------------------|
| <b>Data File</b>          | 20220822 BHZ-YP-4du.wiff | <b>Result Table</b>      | 4-0.004-5d-3.rdb                     |
| <b>Acquisition Date</b>   | 8/23/2022 4:51:18 AM     | <b>Algorithm Used</b>    | MQL                                  |
| <b>Acquisition Method</b> | BHZ method.dam           | <b>Instrument Name</b>   | AB SCIEX Triple Quad 4500            |
| <b>Project</b>            | DPY                      | <b>Processing Method</b> | <i>No data for Processing Method</i> |

**Sample Name:** 0.004-5d-3 **Vial #:** 25

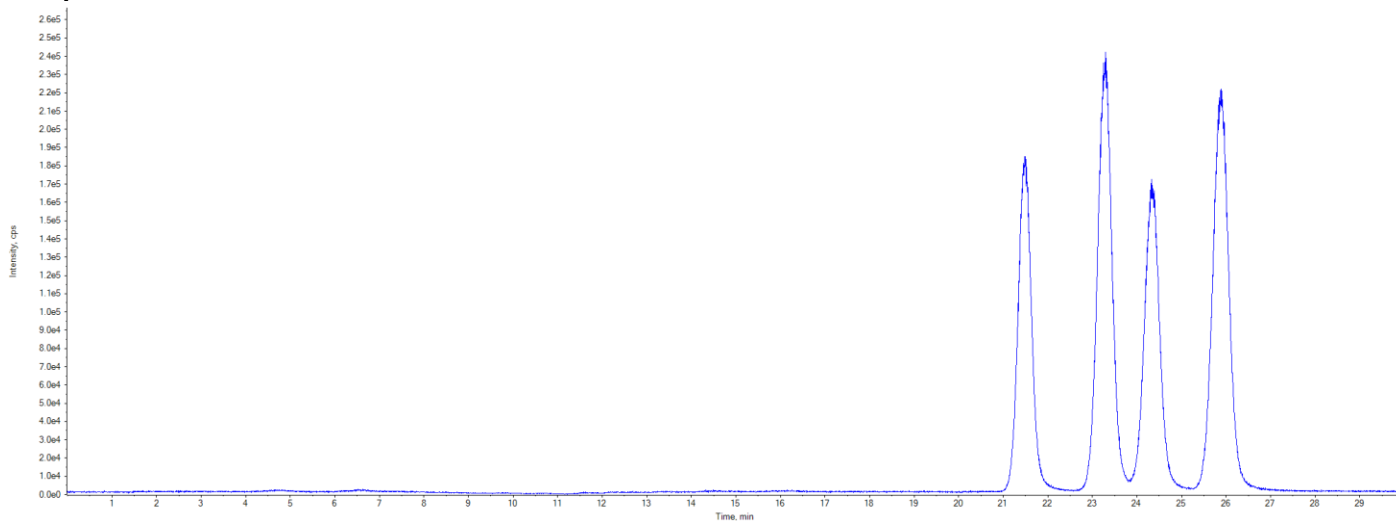

|                           |                                   |                         |                  |
|---------------------------|-----------------------------------|-------------------------|------------------|
| <b>Sample Name</b>        | 0.004-5d-3                        | <b>Injection Vial</b>   | 25               |
| <b>Data File</b>          | 20220822 BHZ-YP-4du.wiff          | <b>Injection Volume</b> | 10               |
| <b>Acquisition Date</b>   | 8/23/2022 4:51:18 AM              | <b>Algorithm Used</b>   | MQL              |
| <b>Acquisition Method</b> | BHZ method.dam                    | <b>Sample Type</b>      | Unknown          |
| <b>Instrument Name</b>    | AB SCIEX Triple Quad 4500         | <b>Result Table</b>     | 4-0.004-5d-3.rdb |
| <b>Sample ID</b>          | <i>No data for Sample ID</i>      | <b>Dilution Factor</b>  | 1.00             |
| <b>Sample Comment</b>     | <i>No data for Sample Comment</i> | <b>Weight to Volume</b> | 0.00             |

Approved By (Date and Initials): \_\_\_\_\_.

|  |                       |                                                         |
|--|-----------------------|---------------------------------------------------------|
|  | <b>Compound Name:</b> | F1 (342.000/159.100 Da)                                 |
|  | Expected RT:          | 21.5                                                    |
|  | Actual RT:            | 21.5                                                    |
|  | Equation:             | At least 2 points are required to calculate regression. |
|  | Area Counts:          | 3.21e+006                                               |
|  | ISTD Area Counts:     | N/A                                                     |
|  | Amount:               | 0.00 (ng/mL)                                            |

|                                                                                   |                                                                                                                                                                                                                                                                                                                                                                                                                                   |                       |                         |              |      |            |      |           |                                                         |              |           |                   |     |         |              |
|-----------------------------------------------------------------------------------|-----------------------------------------------------------------------------------------------------------------------------------------------------------------------------------------------------------------------------------------------------------------------------------------------------------------------------------------------------------------------------------------------------------------------------------|-----------------------|-------------------------|--------------|------|------------|------|-----------|---------------------------------------------------------|--------------|-----------|-------------------|-----|---------|--------------|
| 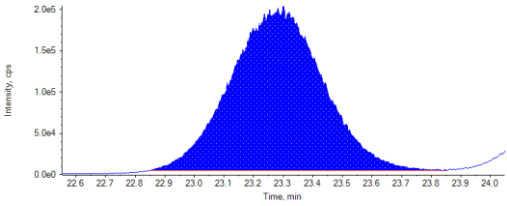 | <table> <tr> <td><b>Compound Name:</b></td><td>F2 (342.000/159.100 Da)</td></tr> <tr> <td>Expected RT:</td><td>23.3</td></tr> <tr> <td>Actual RT:</td><td>23.3</td></tr> <tr> <td>Equation:</td><td>At least 2 points are required to calculate regression.</td></tr> <tr> <td>Area Counts:</td><td>4.38e+006</td></tr> <tr> <td>ISTD Area Counts:</td><td>N/A</td></tr> <tr> <td>Amount:</td><td>0.00 (ng/mL)</td></tr> </table> | <b>Compound Name:</b> | F2 (342.000/159.100 Da) | Expected RT: | 23.3 | Actual RT: | 23.3 | Equation: | At least 2 points are required to calculate regression. | Area Counts: | 4.38e+006 | ISTD Area Counts: | N/A | Amount: | 0.00 (ng/mL) |
| <b>Compound Name:</b>                                                             | F2 (342.000/159.100 Da)                                                                                                                                                                                                                                                                                                                                                                                                           |                       |                         |              |      |            |      |           |                                                         |              |           |                   |     |         |              |
| Expected RT:                                                                      | 23.3                                                                                                                                                                                                                                                                                                                                                                                                                              |                       |                         |              |      |            |      |           |                                                         |              |           |                   |     |         |              |
| Actual RT:                                                                        | 23.3                                                                                                                                                                                                                                                                                                                                                                                                                              |                       |                         |              |      |            |      |           |                                                         |              |           |                   |     |         |              |
| Equation:                                                                         | At least 2 points are required to calculate regression.                                                                                                                                                                                                                                                                                                                                                                           |                       |                         |              |      |            |      |           |                                                         |              |           |                   |     |         |              |
| Area Counts:                                                                      | 4.38e+006                                                                                                                                                                                                                                                                                                                                                                                                                         |                       |                         |              |      |            |      |           |                                                         |              |           |                   |     |         |              |
| ISTD Area Counts:                                                                 | N/A                                                                                                                                                                                                                                                                                                                                                                                                                               |                       |                         |              |      |            |      |           |                                                         |              |           |                   |     |         |              |
| Amount:                                                                           | 0.00 (ng/mL)                                                                                                                                                                                                                                                                                                                                                                                                                      |                       |                         |              |      |            |      |           |                                                         |              |           |                   |     |         |              |
|  | <table> <tr> <td><b>Compound Name:</b></td><td>F3 (342.000/159.100 Da)</td></tr> <tr> <td>Expected RT:</td><td>24.3</td></tr> <tr> <td>Actual RT:</td><td>24.3</td></tr> <tr> <td>Equation:</td><td>At least 2 points are required to calculate regression.</td></tr> <tr> <td>Area Counts:</td><td>3.16e+006</td></tr> <tr> <td>ISTD Area Counts:</td><td>N/A</td></tr> <tr> <td>Amount:</td><td>0.00 (ng/mL)</td></tr> </table> | <b>Compound Name:</b> | F3 (342.000/159.100 Da) | Expected RT: | 24.3 | Actual RT: | 24.3 | Equation: | At least 2 points are required to calculate regression. | Area Counts: | 3.16e+006 | ISTD Area Counts: | N/A | Amount: | 0.00 (ng/mL) |
| <b>Compound Name:</b>                                                             | F3 (342.000/159.100 Da)                                                                                                                                                                                                                                                                                                                                                                                                           |                       |                         |              |      |            |      |           |                                                         |              |           |                   |     |         |              |
| Expected RT:                                                                      | 24.3                                                                                                                                                                                                                                                                                                                                                                                                                              |                       |                         |              |      |            |      |           |                                                         |              |           |                   |     |         |              |
| Actual RT:                                                                        | 24.3                                                                                                                                                                                                                                                                                                                                                                                                                              |                       |                         |              |      |            |      |           |                                                         |              |           |                   |     |         |              |
| Equation:                                                                         | At least 2 points are required to calculate regression.                                                                                                                                                                                                                                                                                                                                                                           |                       |                         |              |      |            |      |           |                                                         |              |           |                   |     |         |              |
| Area Counts:                                                                      | 3.16e+006                                                                                                                                                                                                                                                                                                                                                                                                                         |                       |                         |              |      |            |      |           |                                                         |              |           |                   |     |         |              |
| ISTD Area Counts:                                                                 | N/A                                                                                                                                                                                                                                                                                                                                                                                                                               |                       |                         |              |      |            |      |           |                                                         |              |           |                   |     |         |              |
| Amount:                                                                           | 0.00 (ng/mL)                                                                                                                                                                                                                                                                                                                                                                                                                      |                       |                         |              |      |            |      |           |                                                         |              |           |                   |     |         |              |
|  | <table> <tr> <td><b>Compound Name:</b></td><td>F4 (342.000/159.100 Da)</td></tr> <tr> <td>Expected RT:</td><td>25.9</td></tr> <tr> <td>Actual RT:</td><td>25.9</td></tr> <tr> <td>Equation:</td><td>At least 2 points are required to calculate regression.</td></tr> <tr> <td>Area Counts:</td><td>4.64e+006</td></tr> <tr> <td>ISTD Area Counts:</td><td>N/A</td></tr> <tr> <td>Amount:</td><td>0.00 (ng/mL)</td></tr> </table> | <b>Compound Name:</b> | F4 (342.000/159.100 Da) | Expected RT: | 25.9 | Actual RT: | 25.9 | Equation: | At least 2 points are required to calculate regression. | Area Counts: | 4.64e+006 | ISTD Area Counts: | N/A | Amount: | 0.00 (ng/mL) |
| <b>Compound Name:</b>                                                             | F4 (342.000/159.100 Da)                                                                                                                                                                                                                                                                                                                                                                                                           |                       |                         |              |      |            |      |           |                                                         |              |           |                   |     |         |              |
| Expected RT:                                                                      | 25.9                                                                                                                                                                                                                                                                                                                                                                                                                              |                       |                         |              |      |            |      |           |                                                         |              |           |                   |     |         |              |
| Actual RT:                                                                        | 25.9                                                                                                                                                                                                                                                                                                                                                                                                                              |                       |                         |              |      |            |      |           |                                                         |              |           |                   |     |         |              |
| Equation:                                                                         | At least 2 points are required to calculate regression.                                                                                                                                                                                                                                                                                                                                                                           |                       |                         |              |      |            |      |           |                                                         |              |           |                   |     |         |              |
| Area Counts:                                                                      | 4.64e+006                                                                                                                                                                                                                                                                                                                                                                                                                         |                       |                         |              |      |            |      |           |                                                         |              |           |                   |     |         |              |
| ISTD Area Counts:                                                                 | N/A                                                                                                                                                                                                                                                                                                                                                                                                                               |                       |                         |              |      |            |      |           |                                                         |              |           |                   |     |         |              |
| Amount:                                                                           | 0.00 (ng/mL)                                                                                                                                                                                                                                                                                                                                                                                                                      |                       |                         |              |      |            |      |           |                                                         |              |           |                   |     |         |              |

Figure S17 The LC chromatogram of plums treated with 0.004 a.i. g/L propiconazole at 5 d (4°C)



Figure Caption  
 Figure\_18\_SuppInfo.

|                           |                          |                          |                                      |
|---------------------------|--------------------------|--------------------------|--------------------------------------|
| <b>Data File</b>          | 20220822 BHZ-YP-4du.wiff | <b>Result Table</b>      | 4-0.004-10d-3.rdb                    |
| <b>Acquisition Date</b>   | 8/23/2022 3:16:55 AM     | <b>Algorithm Used</b>    | MQL                                  |
| <b>Acquisition Method</b> | BHZ method.dam           | <b>Instrument Name</b>   | AB SCIEX Triple Quad 4500            |
| <b>Project</b>            | DPY                      | <b>Processing Method</b> | <i>No data for Processing Method</i> |

**Sample Name:** 0.004-10d-3 **Vial #:** 22

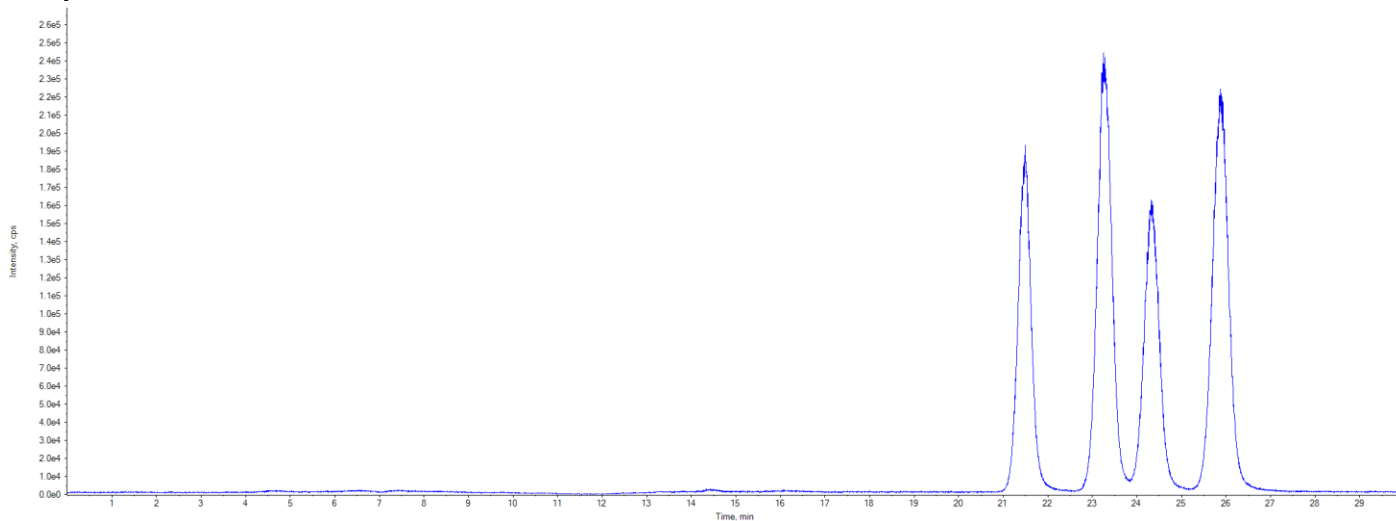

|                           |                                   |                         |                  |
|---------------------------|-----------------------------------|-------------------------|------------------|
| <b>Sample Name</b>        | 0.004-10d-3                       | <b>Injection Vial</b>   | 22               |
| <b>Data File</b>          | 20220822 BHZ-YP-4du.wiff          | <b>Injection Volume</b> | 10               |
| <b>Acquisition Date</b>   | 8/23/2022 3:16:55 AM              | <b>Algorithm Used</b>   | MQL              |
| <b>Acquisition Method</b> | BHZ method.dam                    | <b>Sample Type</b>      | Unknown          |
| <b>Instrument Name</b>    | AB SCIEX Triple Quad 4500         | <b>Result Table</b>     | 4-0.04-10d-3.rdb |
| <b>Sample ID</b>          | <i>No data for Sample ID</i>      | <b>Dilution Factor</b>  | 1.00             |
| <b>Sample Comment</b>     | <i>No data for Sample Comment</i> | <b>Weight to Volume</b> | 0.00             |

Approved By (Date and Initials): \_\_\_\_\_.

|                                                                                                                                                                                                                                                                                                                      |                       |                                                         |
|----------------------------------------------------------------------------------------------------------------------------------------------------------------------------------------------------------------------------------------------------------------------------------------------------------------------|-----------------------|---------------------------------------------------------|
| <p>The zoomed-in chromatogram shows a single, well-resolved peak at a retention time of 21.5 minutes. The x-axis represents time in minutes from 20.8 to 22.2, and the y-axis represents intensity in cps from 0.0e0 to 1.5e5. The peak is symmetric and reaches a maximum intensity of approximately 1.4e5 cps.</p> | <b>Compound Name:</b> | F1 (342.000/159.100 Da)                                 |
|                                                                                                                                                                                                                                                                                                                      | Expected RT:          | 21.5                                                    |
|                                                                                                                                                                                                                                                                                                                      | Actual RT:            | 21.5                                                    |
|                                                                                                                                                                                                                                                                                                                      | Equation:             | At least 2 points are required to calculate regression. |
|                                                                                                                                                                                                                                                                                                                      | Area Counts:          | 3.20e+006                                               |
|                                                                                                                                                                                                                                                                                                                      | ISTD Area Counts:     | N/A                                                     |
|                                                                                                                                                                                                                                                                                                                      | Amount:               | 0.00 (ng/mL)                                            |

|                                                                                   |                                                                                                                                                                                                                                                                                                                                                                                                                                          |                       |                                |              |      |            |      |           |                                                         |              |           |                   |     |         |              |
|-----------------------------------------------------------------------------------|------------------------------------------------------------------------------------------------------------------------------------------------------------------------------------------------------------------------------------------------------------------------------------------------------------------------------------------------------------------------------------------------------------------------------------------|-----------------------|--------------------------------|--------------|------|------------|------|-----------|---------------------------------------------------------|--------------|-----------|-------------------|-----|---------|--------------|
| 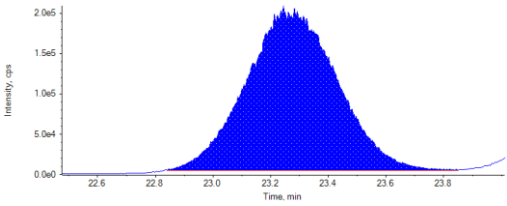 | <table> <tr> <td><b>Compound Name:</b></td><td><b>F2 (342.000/159.100 Da)</b></td></tr> <tr> <td>Expected RT:</td><td>23.2</td></tr> <tr> <td>Actual RT:</td><td>23.2</td></tr> <tr> <td>Equation:</td><td>At least 2 points are required to calculate regression.</td></tr> <tr> <td>Area Counts:</td><td>4.49e+006</td></tr> <tr> <td>ISTD Area Counts:</td><td>N/A</td></tr> <tr> <td>Amount:</td><td>0.00 (ng/mL)</td></tr> </table> | <b>Compound Name:</b> | <b>F2 (342.000/159.100 Da)</b> | Expected RT: | 23.2 | Actual RT: | 23.2 | Equation: | At least 2 points are required to calculate regression. | Area Counts: | 4.49e+006 | ISTD Area Counts: | N/A | Amount: | 0.00 (ng/mL) |
| <b>Compound Name:</b>                                                             | <b>F2 (342.000/159.100 Da)</b>                                                                                                                                                                                                                                                                                                                                                                                                           |                       |                                |              |      |            |      |           |                                                         |              |           |                   |     |         |              |
| Expected RT:                                                                      | 23.2                                                                                                                                                                                                                                                                                                                                                                                                                                     |                       |                                |              |      |            |      |           |                                                         |              |           |                   |     |         |              |
| Actual RT:                                                                        | 23.2                                                                                                                                                                                                                                                                                                                                                                                                                                     |                       |                                |              |      |            |      |           |                                                         |              |           |                   |     |         |              |
| Equation:                                                                         | At least 2 points are required to calculate regression.                                                                                                                                                                                                                                                                                                                                                                                  |                       |                                |              |      |            |      |           |                                                         |              |           |                   |     |         |              |
| Area Counts:                                                                      | 4.49e+006                                                                                                                                                                                                                                                                                                                                                                                                                                |                       |                                |              |      |            |      |           |                                                         |              |           |                   |     |         |              |
| ISTD Area Counts:                                                                 | N/A                                                                                                                                                                                                                                                                                                                                                                                                                                      |                       |                                |              |      |            |      |           |                                                         |              |           |                   |     |         |              |
| Amount:                                                                           | 0.00 (ng/mL)                                                                                                                                                                                                                                                                                                                                                                                                                             |                       |                                |              |      |            |      |           |                                                         |              |           |                   |     |         |              |
|  | <table> <tr> <td><b>Compound Name:</b></td><td><b>F3 (342.000/159.100 Da)</b></td></tr> <tr> <td>Expected RT:</td><td>24.3</td></tr> <tr> <td>Actual RT:</td><td>24.3</td></tr> <tr> <td>Equation:</td><td>At least 2 points are required to calculate regression.</td></tr> <tr> <td>Area Counts:</td><td>3.00e+006</td></tr> <tr> <td>ISTD Area Counts:</td><td>N/A</td></tr> <tr> <td>Amount:</td><td>0.00 (ng/mL)</td></tr> </table> | <b>Compound Name:</b> | <b>F3 (342.000/159.100 Da)</b> | Expected RT: | 24.3 | Actual RT: | 24.3 | Equation: | At least 2 points are required to calculate regression. | Area Counts: | 3.00e+006 | ISTD Area Counts: | N/A | Amount: | 0.00 (ng/mL) |
| <b>Compound Name:</b>                                                             | <b>F3 (342.000/159.100 Da)</b>                                                                                                                                                                                                                                                                                                                                                                                                           |                       |                                |              |      |            |      |           |                                                         |              |           |                   |     |         |              |
| Expected RT:                                                                      | 24.3                                                                                                                                                                                                                                                                                                                                                                                                                                     |                       |                                |              |      |            |      |           |                                                         |              |           |                   |     |         |              |
| Actual RT:                                                                        | 24.3                                                                                                                                                                                                                                                                                                                                                                                                                                     |                       |                                |              |      |            |      |           |                                                         |              |           |                   |     |         |              |
| Equation:                                                                         | At least 2 points are required to calculate regression.                                                                                                                                                                                                                                                                                                                                                                                  |                       |                                |              |      |            |      |           |                                                         |              |           |                   |     |         |              |
| Area Counts:                                                                      | 3.00e+006                                                                                                                                                                                                                                                                                                                                                                                                                                |                       |                                |              |      |            |      |           |                                                         |              |           |                   |     |         |              |
| ISTD Area Counts:                                                                 | N/A                                                                                                                                                                                                                                                                                                                                                                                                                                      |                       |                                |              |      |            |      |           |                                                         |              |           |                   |     |         |              |
| Amount:                                                                           | 0.00 (ng/mL)                                                                                                                                                                                                                                                                                                                                                                                                                             |                       |                                |              |      |            |      |           |                                                         |              |           |                   |     |         |              |
|  | <table> <tr> <td><b>Compound Name:</b></td><td><b>F4 (342.000/159.100 Da)</b></td></tr> <tr> <td>Expected RT:</td><td>25.9</td></tr> <tr> <td>Actual RT:</td><td>25.9</td></tr> <tr> <td>Equation:</td><td>At least 2 points are required to calculate regression.</td></tr> <tr> <td>Area Counts:</td><td>4.72e+006</td></tr> <tr> <td>ISTD Area Counts:</td><td>N/A</td></tr> <tr> <td>Amount:</td><td>0.00 (ng/mL)</td></tr> </table> | <b>Compound Name:</b> | <b>F4 (342.000/159.100 Da)</b> | Expected RT: | 25.9 | Actual RT: | 25.9 | Equation: | At least 2 points are required to calculate regression. | Area Counts: | 4.72e+006 | ISTD Area Counts: | N/A | Amount: | 0.00 (ng/mL) |
| <b>Compound Name:</b>                                                             | <b>F4 (342.000/159.100 Da)</b>                                                                                                                                                                                                                                                                                                                                                                                                           |                       |                                |              |      |            |      |           |                                                         |              |           |                   |     |         |              |
| Expected RT:                                                                      | 25.9                                                                                                                                                                                                                                                                                                                                                                                                                                     |                       |                                |              |      |            |      |           |                                                         |              |           |                   |     |         |              |
| Actual RT:                                                                        | 25.9                                                                                                                                                                                                                                                                                                                                                                                                                                     |                       |                                |              |      |            |      |           |                                                         |              |           |                   |     |         |              |
| Equation:                                                                         | At least 2 points are required to calculate regression.                                                                                                                                                                                                                                                                                                                                                                                  |                       |                                |              |      |            |      |           |                                                         |              |           |                   |     |         |              |
| Area Counts:                                                                      | 4.72e+006                                                                                                                                                                                                                                                                                                                                                                                                                                |                       |                                |              |      |            |      |           |                                                         |              |           |                   |     |         |              |
| ISTD Area Counts:                                                                 | N/A                                                                                                                                                                                                                                                                                                                                                                                                                                      |                       |                                |              |      |            |      |           |                                                         |              |           |                   |     |         |              |
| Amount:                                                                           | 0.00 (ng/mL)                                                                                                                                                                                                                                                                                                                                                                                                                             |                       |                                |              |      |            |      |           |                                                         |              |           |                   |     |         |              |

Figure S18 The LC chromatogram of plums treated with 0.004 a.i. g/L propiconazole at 10 d (4°C)



Figure Caption  
 Figure\_19\_SuppInfo.

|                           |                          |                          |                                      |
|---------------------------|--------------------------|--------------------------|--------------------------------------|
| <b>Data File</b>          | 20220822 BHZ-YP-4du.wiff | <b>Result Table</b>      | 4-0.004-15d-1.rdb                    |
| <b>Acquisition Date</b>   | 8/23/2022 12:39:37 AM    | <b>Algorithm Used</b>    | MQL                                  |
| <b>Acquisition Method</b> | BHZ method.dam           | <b>Instrument Name</b>   | AB SCIEX Triple Quad 4500            |
| <b>Project</b>            | DPY                      | <b>Processing Method</b> | <i>No data for Processing Method</i> |

**Sample Name:** 0.004-15d-1 **Vial #:** 17

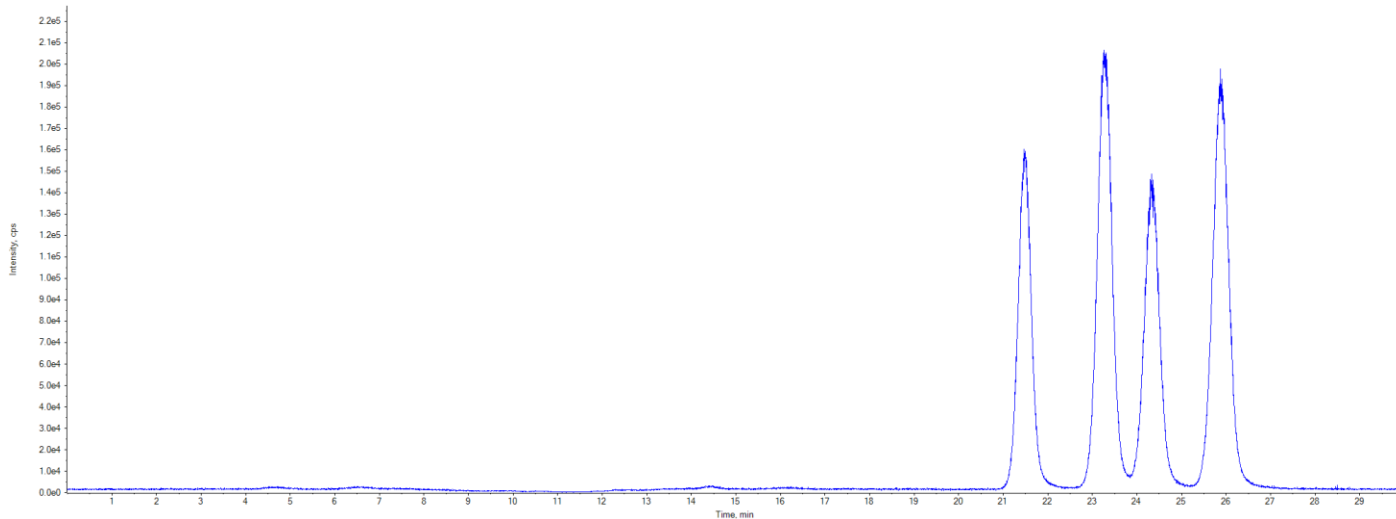

|                           |                                   |                         |                   |
|---------------------------|-----------------------------------|-------------------------|-------------------|
| <b>Sample Name</b>        | 0.004-15d-1                       | <b>Injection Vial</b>   | 17                |
| <b>Data File</b>          | 20220822 BHZ-YP-4du.wiff          | <b>Injection Volume</b> | 10                |
| <b>Acquisition Date</b>   | 8/23/2022 12:39:37 AM             | <b>Algorithm Used</b>   | MQL               |
| <b>Acquisition Method</b> | BHZ method.dam                    | <b>Sample Type</b>      | Unknown           |
| <b>Instrument Name</b>    | AB SCIEX Triple Quad 4500         | <b>Result Table</b>     | 4-0.004-15d-1.rdb |
| <b>Sample ID</b>          | <i>No data for Sample ID</i>      | <b>Dilution Factor</b>  | 1.00              |
| <b>Sample Comment</b>     | <i>No data for Sample Comment</i> | <b>Weight to Volume</b> | 0.00              |

Approved By (Date and Initials): \_\_\_\_\_.

|                                                                                                                                                                                                      |                       |                                                         |
|------------------------------------------------------------------------------------------------------------------------------------------------------------------------------------------------------|-----------------------|---------------------------------------------------------|
| <p>The zoomed-in chromatogram shows a single peak at 21.5 minutes with intensity from 0.0e0 to 1.2e5 cps over a time range of 20.8 to 22.2 minutes. A blue Gaussian curve is fitted to the peak.</p> | <b>Compound Name:</b> | F1 (342.000/159.100 Da)                                 |
|                                                                                                                                                                                                      | Expected RT:          | 21.5                                                    |
|                                                                                                                                                                                                      | Actual RT:            | 21.5                                                    |
|                                                                                                                                                                                                      | Equation:             | At least 2 points are required to calculate regression. |
|                                                                                                                                                                                                      | Area Counts:          | 2.76e+006                                               |
|                                                                                                                                                                                                      | ISTD Area Counts:     | N/A                                                     |
|                                                                                                                                                                                                      | Amount:               | 0.00 (ng/mL)                                            |

|                                                                                   |                                                                                                                                                                                                                                                                                                                                                                                                                                          |                       |                                |              |      |            |      |           |                                                         |              |           |                   |     |         |              |
|-----------------------------------------------------------------------------------|------------------------------------------------------------------------------------------------------------------------------------------------------------------------------------------------------------------------------------------------------------------------------------------------------------------------------------------------------------------------------------------------------------------------------------------|-----------------------|--------------------------------|--------------|------|------------|------|-----------|---------------------------------------------------------|--------------|-----------|-------------------|-----|---------|--------------|
| 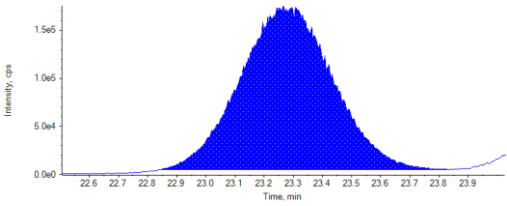 | <table> <tr> <td><b>Compound Name:</b></td><td><b>F2 (342.000/159.100 Da)</b></td></tr> <tr> <td>Expected RT:</td><td>23.3</td></tr> <tr> <td>Actual RT:</td><td>23.3</td></tr> <tr> <td>Equation:</td><td>At least 2 points are required to calculate regression.</td></tr> <tr> <td>Area Counts:</td><td>3.87e+006</td></tr> <tr> <td>ISTD Area Counts:</td><td>N/A</td></tr> <tr> <td>Amount:</td><td>0.00 (ng/mL)</td></tr> </table> | <b>Compound Name:</b> | <b>F2 (342.000/159.100 Da)</b> | Expected RT: | 23.3 | Actual RT: | 23.3 | Equation: | At least 2 points are required to calculate regression. | Area Counts: | 3.87e+006 | ISTD Area Counts: | N/A | Amount: | 0.00 (ng/mL) |
| <b>Compound Name:</b>                                                             | <b>F2 (342.000/159.100 Da)</b>                                                                                                                                                                                                                                                                                                                                                                                                           |                       |                                |              |      |            |      |           |                                                         |              |           |                   |     |         |              |
| Expected RT:                                                                      | 23.3                                                                                                                                                                                                                                                                                                                                                                                                                                     |                       |                                |              |      |            |      |           |                                                         |              |           |                   |     |         |              |
| Actual RT:                                                                        | 23.3                                                                                                                                                                                                                                                                                                                                                                                                                                     |                       |                                |              |      |            |      |           |                                                         |              |           |                   |     |         |              |
| Equation:                                                                         | At least 2 points are required to calculate regression.                                                                                                                                                                                                                                                                                                                                                                                  |                       |                                |              |      |            |      |           |                                                         |              |           |                   |     |         |              |
| Area Counts:                                                                      | 3.87e+006                                                                                                                                                                                                                                                                                                                                                                                                                                |                       |                                |              |      |            |      |           |                                                         |              |           |                   |     |         |              |
| ISTD Area Counts:                                                                 | N/A                                                                                                                                                                                                                                                                                                                                                                                                                                      |                       |                                |              |      |            |      |           |                                                         |              |           |                   |     |         |              |
| Amount:                                                                           | 0.00 (ng/mL)                                                                                                                                                                                                                                                                                                                                                                                                                             |                       |                                |              |      |            |      |           |                                                         |              |           |                   |     |         |              |
|  | <table> <tr> <td><b>Compound Name:</b></td><td><b>F3 (342.000/159.100 Da)</b></td></tr> <tr> <td>Expected RT:</td><td>24.3</td></tr> <tr> <td>Actual RT:</td><td>24.3</td></tr> <tr> <td>Equation:</td><td>At least 2 points are required to calculate regression.</td></tr> <tr> <td>Area Counts:</td><td>2.72e+006</td></tr> <tr> <td>ISTD Area Counts:</td><td>N/A</td></tr> <tr> <td>Amount:</td><td>0.00 (ng/mL)</td></tr> </table> | <b>Compound Name:</b> | <b>F3 (342.000/159.100 Da)</b> | Expected RT: | 24.3 | Actual RT: | 24.3 | Equation: | At least 2 points are required to calculate regression. | Area Counts: | 2.72e+006 | ISTD Area Counts: | N/A | Amount: | 0.00 (ng/mL) |
| <b>Compound Name:</b>                                                             | <b>F3 (342.000/159.100 Da)</b>                                                                                                                                                                                                                                                                                                                                                                                                           |                       |                                |              |      |            |      |           |                                                         |              |           |                   |     |         |              |
| Expected RT:                                                                      | 24.3                                                                                                                                                                                                                                                                                                                                                                                                                                     |                       |                                |              |      |            |      |           |                                                         |              |           |                   |     |         |              |
| Actual RT:                                                                        | 24.3                                                                                                                                                                                                                                                                                                                                                                                                                                     |                       |                                |              |      |            |      |           |                                                         |              |           |                   |     |         |              |
| Equation:                                                                         | At least 2 points are required to calculate regression.                                                                                                                                                                                                                                                                                                                                                                                  |                       |                                |              |      |            |      |           |                                                         |              |           |                   |     |         |              |
| Area Counts:                                                                      | 2.72e+006                                                                                                                                                                                                                                                                                                                                                                                                                                |                       |                                |              |      |            |      |           |                                                         |              |           |                   |     |         |              |
| ISTD Area Counts:                                                                 | N/A                                                                                                                                                                                                                                                                                                                                                                                                                                      |                       |                                |              |      |            |      |           |                                                         |              |           |                   |     |         |              |
| Amount:                                                                           | 0.00 (ng/mL)                                                                                                                                                                                                                                                                                                                                                                                                                             |                       |                                |              |      |            |      |           |                                                         |              |           |                   |     |         |              |
|  | <table> <tr> <td><b>Compound Name:</b></td><td><b>F4 (342.000/159.100 Da)</b></td></tr> <tr> <td>Expected RT:</td><td>25.9</td></tr> <tr> <td>Actual RT:</td><td>25.9</td></tr> <tr> <td>Equation:</td><td>At least 2 points are required to calculate regression.</td></tr> <tr> <td>Area Counts:</td><td>4.09e+006</td></tr> <tr> <td>ISTD Area Counts:</td><td>N/A</td></tr> <tr> <td>Amount:</td><td>0.00 (ng/mL)</td></tr> </table> | <b>Compound Name:</b> | <b>F4 (342.000/159.100 Da)</b> | Expected RT: | 25.9 | Actual RT: | 25.9 | Equation: | At least 2 points are required to calculate regression. | Area Counts: | 4.09e+006 | ISTD Area Counts: | N/A | Amount: | 0.00 (ng/mL) |
| <b>Compound Name:</b>                                                             | <b>F4 (342.000/159.100 Da)</b>                                                                                                                                                                                                                                                                                                                                                                                                           |                       |                                |              |      |            |      |           |                                                         |              |           |                   |     |         |              |
| Expected RT:                                                                      | 25.9                                                                                                                                                                                                                                                                                                                                                                                                                                     |                       |                                |              |      |            |      |           |                                                         |              |           |                   |     |         |              |
| Actual RT:                                                                        | 25.9                                                                                                                                                                                                                                                                                                                                                                                                                                     |                       |                                |              |      |            |      |           |                                                         |              |           |                   |     |         |              |
| Equation:                                                                         | At least 2 points are required to calculate regression.                                                                                                                                                                                                                                                                                                                                                                                  |                       |                                |              |      |            |      |           |                                                         |              |           |                   |     |         |              |
| Area Counts:                                                                      | 4.09e+006                                                                                                                                                                                                                                                                                                                                                                                                                                |                       |                                |              |      |            |      |           |                                                         |              |           |                   |     |         |              |
| ISTD Area Counts:                                                                 | N/A                                                                                                                                                                                                                                                                                                                                                                                                                                      |                       |                                |              |      |            |      |           |                                                         |              |           |                   |     |         |              |
| Amount:                                                                           | 0.00 (ng/mL)                                                                                                                                                                                                                                                                                                                                                                                                                             |                       |                                |              |      |            |      |           |                                                         |              |           |                   |     |         |              |

Figure S19 The LC chromatogram of plums treated with 0.004 a.i. g/L propiconazole at 15 d (4°C)



Figure Caption  
 Figure\_20\_SuppInfo.

|                           |                          |                          |                                      |
|---------------------------|--------------------------|--------------------------|--------------------------------------|
| <b>Data File</b>          | 20220822 BHZ-YP-4du.wiff | <b>Result Table</b>      | 4-0.004-20d-2.rdb                    |
| <b>Acquisition Date</b>   | 8/22/2022 11:36:42 PM    | <b>Algorithm Used</b>    | MQL                                  |
| <b>Acquisition Method</b> | BHZ method.dam           | <b>Instrument Name</b>   | AB SCIEX Triple Quad 4500            |
| <b>Project</b>            | DPY                      | <b>Processing Method</b> | <i>No data for Processing Method</i> |

**Sample Name:** 0.004-20d-2 **Vial #:** 15

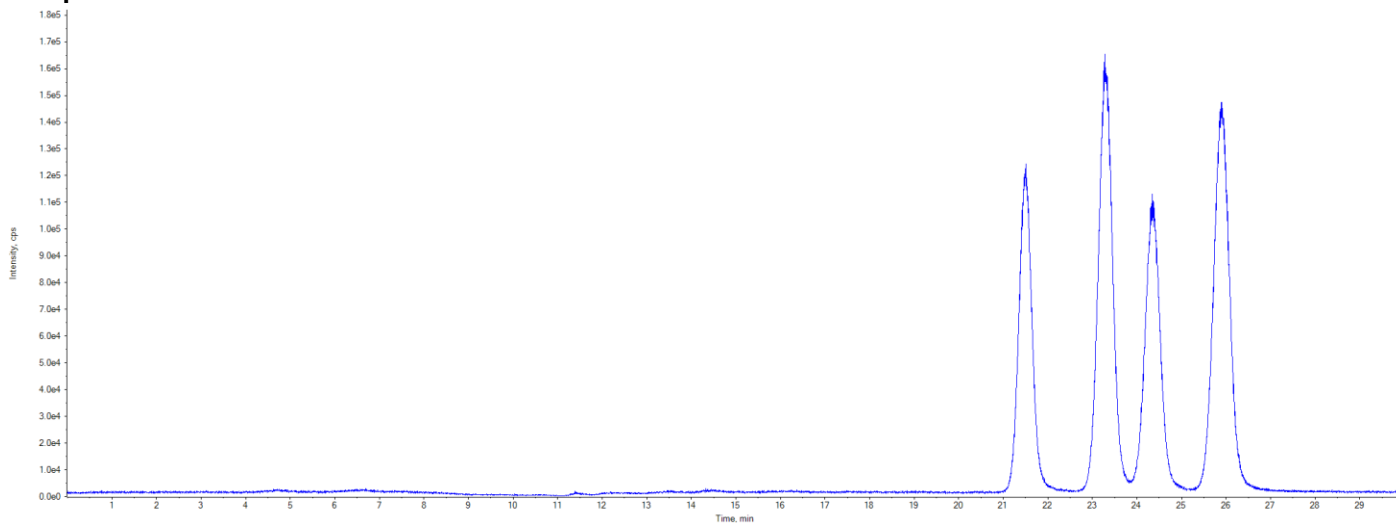

|                           |                                   |                         |                   |
|---------------------------|-----------------------------------|-------------------------|-------------------|
| <b>Sample Name</b>        | 0.004-20d-2                       | <b>Injection Vial</b>   | 15                |
| <b>Data File</b>          | 20220822 BHZ-YP-4du.wiff          | <b>Injection Volume</b> | 10                |
| <b>Acquisition Date</b>   | 8/22/2022 11:36:42 PM             | <b>Algorithm Used</b>   | MQL               |
| <b>Acquisition Method</b> | BHZ method.dam                    | <b>Sample Type</b>      | Unknown           |
| <b>Instrument Name</b>    | AB SCIEX Triple Quad 4500         | <b>Result Table</b>     | 4-0.004-20d-2.rdb |
| <b>Sample ID</b>          | <i>No data for Sample ID</i>      | <b>Dilution Factor</b>  | 1.00              |
| <b>Sample Comment</b>     | <i>No data for Sample Comment</i> | <b>Weight to Volume</b> | 0.00              |

Approved By (Date and Initials): \_\_\_\_\_.

|                                                                                                                                                                                                                                                                                                     |                       |                                                         |
|-----------------------------------------------------------------------------------------------------------------------------------------------------------------------------------------------------------------------------------------------------------------------------------------------------|-----------------------|---------------------------------------------------------|
| <p>The zoomed-in chromatogram shows a single, well-resolved peak at a retention time of 21.5 minutes. The x-axis ranges from 20.8 to 22.2 minutes, and the y-axis (intensity) ranges from 0.0e0 to 1.0e5 cps. The peak is symmetric and reaches a maximum intensity of approximately 9.0e4 cps.</p> | <b>Compound Name:</b> | F1 (342.000/159.100 Da)                                 |
|                                                                                                                                                                                                                                                                                                     | Expected RT:          | 21.5                                                    |
|                                                                                                                                                                                                                                                                                                     | Actual RT:            | 21.5                                                    |
|                                                                                                                                                                                                                                                                                                     | Equation:             | At least 2 points are required to calculate regression. |
|                                                                                                                                                                                                                                                                                                     | Area Counts:          | 2.07e+006                                               |
|                                                                                                                                                                                                                                                                                                     | ISTD Area Counts:     | N/A                                                     |
|                                                                                                                                                                                                                                                                                                     | Amount:               | 0.00 (ng/mL)                                            |



|                                                                                   |                                                                                                                                                                                                                                                                                                                                                                                                                                          |                       |                                |              |      |            |      |           |                                                         |              |           |                   |     |         |              |
|-----------------------------------------------------------------------------------|------------------------------------------------------------------------------------------------------------------------------------------------------------------------------------------------------------------------------------------------------------------------------------------------------------------------------------------------------------------------------------------------------------------------------------------|-----------------------|--------------------------------|--------------|------|------------|------|-----------|---------------------------------------------------------|--------------|-----------|-------------------|-----|---------|--------------|
| 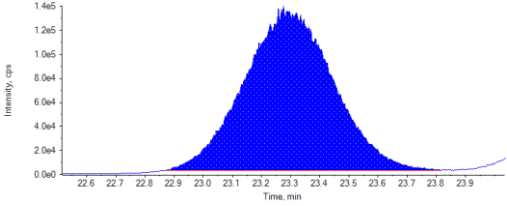 | <table> <tr> <td><b>Compound Name:</b></td><td><b>F2 (342.000/159.100 Da)</b></td></tr> <tr> <td>Expected RT:</td><td>23.3</td></tr> <tr> <td>Actual RT:</td><td>23.3</td></tr> <tr> <td>Equation:</td><td>At least 2 points are required to calculate regression.</td></tr> <tr> <td>Area Counts:</td><td>2.93e+006</td></tr> <tr> <td>ISTD Area Counts:</td><td>N/A</td></tr> <tr> <td>Amount:</td><td>0.00 (ng/mL)</td></tr> </table> | <b>Compound Name:</b> | <b>F2 (342.000/159.100 Da)</b> | Expected RT: | 23.3 | Actual RT: | 23.3 | Equation: | At least 2 points are required to calculate regression. | Area Counts: | 2.93e+006 | ISTD Area Counts: | N/A | Amount: | 0.00 (ng/mL) |
| <b>Compound Name:</b>                                                             | <b>F2 (342.000/159.100 Da)</b>                                                                                                                                                                                                                                                                                                                                                                                                           |                       |                                |              |      |            |      |           |                                                         |              |           |                   |     |         |              |
| Expected RT:                                                                      | 23.3                                                                                                                                                                                                                                                                                                                                                                                                                                     |                       |                                |              |      |            |      |           |                                                         |              |           |                   |     |         |              |
| Actual RT:                                                                        | 23.3                                                                                                                                                                                                                                                                                                                                                                                                                                     |                       |                                |              |      |            |      |           |                                                         |              |           |                   |     |         |              |
| Equation:                                                                         | At least 2 points are required to calculate regression.                                                                                                                                                                                                                                                                                                                                                                                  |                       |                                |              |      |            |      |           |                                                         |              |           |                   |     |         |              |
| Area Counts:                                                                      | 2.93e+006                                                                                                                                                                                                                                                                                                                                                                                                                                |                       |                                |              |      |            |      |           |                                                         |              |           |                   |     |         |              |
| ISTD Area Counts:                                                                 | N/A                                                                                                                                                                                                                                                                                                                                                                                                                                      |                       |                                |              |      |            |      |           |                                                         |              |           |                   |     |         |              |
| Amount:                                                                           | 0.00 (ng/mL)                                                                                                                                                                                                                                                                                                                                                                                                                             |                       |                                |              |      |            |      |           |                                                         |              |           |                   |     |         |              |
|  | <table> <tr> <td><b>Compound Name:</b></td><td><b>F3 (342.000/159.100 Da)</b></td></tr> <tr> <td>Expected RT:</td><td>24.3</td></tr> <tr> <td>Actual RT:</td><td>24.3</td></tr> <tr> <td>Equation:</td><td>At least 2 points are required to calculate regression.</td></tr> <tr> <td>Area Counts:</td><td>2.01e+006</td></tr> <tr> <td>ISTD Area Counts:</td><td>N/A</td></tr> <tr> <td>Amount:</td><td>0.00 (ng/mL)</td></tr> </table> | <b>Compound Name:</b> | <b>F3 (342.000/159.100 Da)</b> | Expected RT: | 24.3 | Actual RT: | 24.3 | Equation: | At least 2 points are required to calculate regression. | Area Counts: | 2.01e+006 | ISTD Area Counts: | N/A | Amount: | 0.00 (ng/mL) |
| <b>Compound Name:</b>                                                             | <b>F3 (342.000/159.100 Da)</b>                                                                                                                                                                                                                                                                                                                                                                                                           |                       |                                |              |      |            |      |           |                                                         |              |           |                   |     |         |              |
| Expected RT:                                                                      | 24.3                                                                                                                                                                                                                                                                                                                                                                                                                                     |                       |                                |              |      |            |      |           |                                                         |              |           |                   |     |         |              |
| Actual RT:                                                                        | 24.3                                                                                                                                                                                                                                                                                                                                                                                                                                     |                       |                                |              |      |            |      |           |                                                         |              |           |                   |     |         |              |
| Equation:                                                                         | At least 2 points are required to calculate regression.                                                                                                                                                                                                                                                                                                                                                                                  |                       |                                |              |      |            |      |           |                                                         |              |           |                   |     |         |              |
| Area Counts:                                                                      | 2.01e+006                                                                                                                                                                                                                                                                                                                                                                                                                                |                       |                                |              |      |            |      |           |                                                         |              |           |                   |     |         |              |
| ISTD Area Counts:                                                                 | N/A                                                                                                                                                                                                                                                                                                                                                                                                                                      |                       |                                |              |      |            |      |           |                                                         |              |           |                   |     |         |              |
| Amount:                                                                           | 0.00 (ng/mL)                                                                                                                                                                                                                                                                                                                                                                                                                             |                       |                                |              |      |            |      |           |                                                         |              |           |                   |     |         |              |
|  | <table> <tr> <td><b>Compound Name:</b></td><td><b>F4 (342.000/159.100 Da)</b></td></tr> <tr> <td>Expected RT:</td><td>25.9</td></tr> <tr> <td>Actual RT:</td><td>25.9</td></tr> <tr> <td>Equation:</td><td>At least 2 points are required to calculate regression.</td></tr> <tr> <td>Area Counts:</td><td>3.03e+006</td></tr> <tr> <td>ISTD Area Counts:</td><td>N/A</td></tr> <tr> <td>Amount:</td><td>0.00 (ng/mL)</td></tr> </table> | <b>Compound Name:</b> | <b>F4 (342.000/159.100 Da)</b> | Expected RT: | 25.9 | Actual RT: | 25.9 | Equation: | At least 2 points are required to calculate regression. | Area Counts: | 3.03e+006 | ISTD Area Counts: | N/A | Amount: | 0.00 (ng/mL) |
| <b>Compound Name:</b>                                                             | <b>F4 (342.000/159.100 Da)</b>                                                                                                                                                                                                                                                                                                                                                                                                           |                       |                                |              |      |            |      |           |                                                         |              |           |                   |     |         |              |
| Expected RT:                                                                      | 25.9                                                                                                                                                                                                                                                                                                                                                                                                                                     |                       |                                |              |      |            |      |           |                                                         |              |           |                   |     |         |              |
| Actual RT:                                                                        | 25.9                                                                                                                                                                                                                                                                                                                                                                                                                                     |                       |                                |              |      |            |      |           |                                                         |              |           |                   |     |         |              |
| Equation:                                                                         | At least 2 points are required to calculate regression.                                                                                                                                                                                                                                                                                                                                                                                  |                       |                                |              |      |            |      |           |                                                         |              |           |                   |     |         |              |
| Area Counts:                                                                      | 3.03e+006                                                                                                                                                                                                                                                                                                                                                                                                                                |                       |                                |              |      |            |      |           |                                                         |              |           |                   |     |         |              |
| ISTD Area Counts:                                                                 | N/A                                                                                                                                                                                                                                                                                                                                                                                                                                      |                       |                                |              |      |            |      |           |                                                         |              |           |                   |     |         |              |
| Amount:                                                                           | 0.00 (ng/mL)                                                                                                                                                                                                                                                                                                                                                                                                                             |                       |                                |              |      |            |      |           |                                                         |              |           |                   |     |         |              |

Figure S20 The LC chromatogram of plums treated with 0.004 a.i. g/L propiconazole at 20 d (4°C)



Figure Caption  
 Figure\_21\_SuppInfo.

|                           |                          |                          |                                      |
|---------------------------|--------------------------|--------------------------|--------------------------------------|
| <b>Data File</b>          | 20220822 BHZ-YP-4du.wiff | <b>Result Table</b>      | 4-0.004-25d-2.rdb                    |
| <b>Acquisition Date</b>   | 8/22/2022 10:02:19 PM    | <b>Algorithm Used</b>    | MQL                                  |
| <b>Acquisition Method</b> | BHZ method.dam           | <b>Instrument Name</b>   | AB SCIEX Triple Quad 4500            |
| <b>Project</b>            | DPY                      | <b>Processing Method</b> | <i>No data for Processing Method</i> |

Sample Name: 0.004-25d-2 Vial #: 12

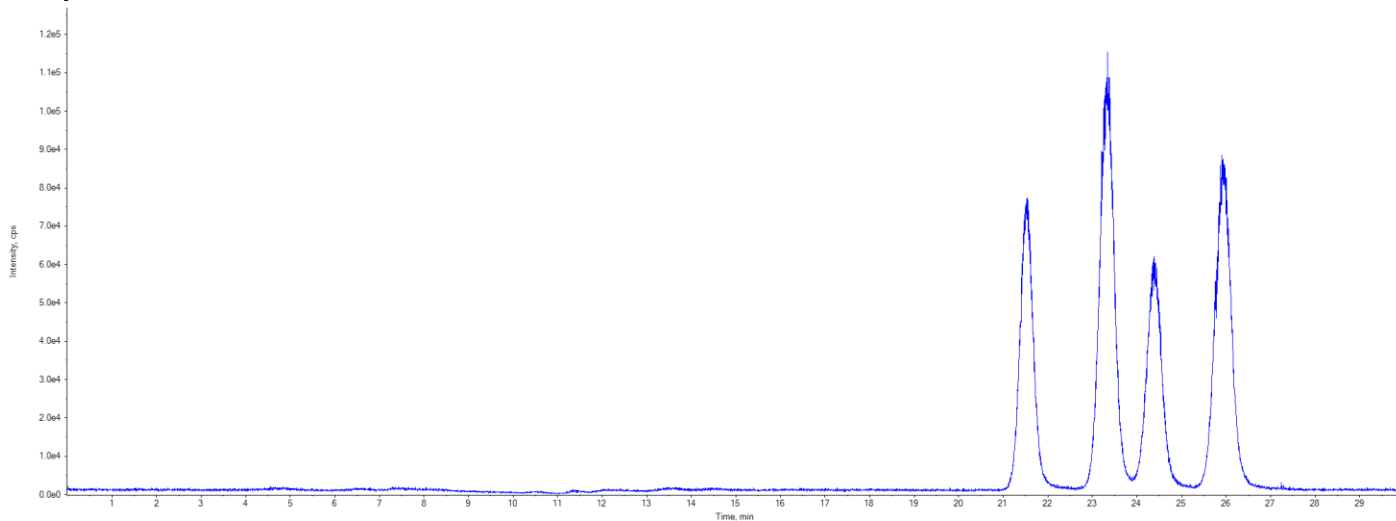

|                           |                                   |                         |                   |
|---------------------------|-----------------------------------|-------------------------|-------------------|
| <b>Sample Name</b>        | 0.004-25d-2                       | <b>Injection Vial</b>   | 12                |
| <b>Data File</b>          | 20220822 BHZ-YP-4du.wiff          | <b>Injection Volume</b> | 10                |
| <b>Acquisition Date</b>   | 8/22/2022 10:02:19 PM             | <b>Algorithm Used</b>   | MQL               |
| <b>Acquisition Method</b> | BHZ method.dam                    | <b>Sample Type</b>      | Unknown           |
| <b>Instrument Name</b>    | AB SCIEX Triple Quad 4500         | <b>Result Table</b>     | 4-0.004-25d-2.rdb |
| <b>Sample ID</b>          | <i>No data for Sample ID</i>      | <b>Dilution Factor</b>  | 1.00              |
| <b>Sample Comment</b>     | <i>No data for Sample Comment</i> | <b>Weight to Volume</b> | 0.00              |

Approved By (Date and Initials): \_\_\_\_\_.

|                                                                                                                                                                                                                       |                       |                                                         |
|-----------------------------------------------------------------------------------------------------------------------------------------------------------------------------------------------------------------------|-----------------------|---------------------------------------------------------|
| <p>The zoomed-in chromatogram shows a single, well-resolved peak at a retention time of 21.5 minutes. The y-axis represents intensity in cps (0 to 6e4) and the x-axis represents time in minutes (20.8 to 22.2).</p> | <b>Compound Name:</b> | F1 (342.000/159.100 Da)                                 |
|                                                                                                                                                                                                                       | Expected RT:          | 21.5                                                    |
|                                                                                                                                                                                                                       | Actual RT:            | 21.5                                                    |
|                                                                                                                                                                                                                       | Equation:             | At least 2 points are required to calculate regression. |
|                                                                                                                                                                                                                       | Area Counts:          | 1.28e+006                                               |
|                                                                                                                                                                                                                       | ISTD Area Counts:     | N/A                                                     |
|                                                                                                                                                                                                                       | Amount:               | 0.00 (ng/mL)                                            |

|                                                                                  |                       |                                                         |
|----------------------------------------------------------------------------------|-----------------------|---------------------------------------------------------|
| 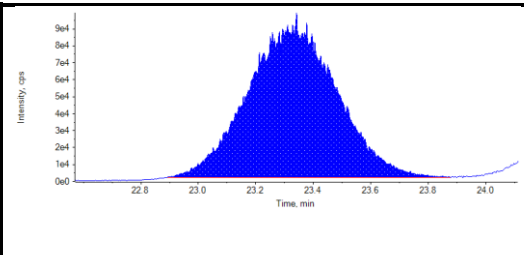 | <b>Compound Name:</b> | F2 (342.000/159.100 Da)                                 |
|                                                                                  | Expected RT:          | 23.3                                                    |
|                                                                                  | Actual RT:            | 23.3                                                    |
|                                                                                  | Equation:             | At least 2 points are required to calculate regression. |
|                                                                                  | Area Counts:          | 2.00e+006                                               |
|                                                                                  | ISTD Area Counts:     | N/A                                                     |
|  | <b>Compound Name:</b> | F3 (342.000/159.100 Da)                                 |
|                                                                                  | Expected RT:          | 24.4                                                    |
|                                                                                  | Actual RT:            | 24.4                                                    |
|                                                                                  | Equation:             | At least 2 points are required to calculate regression. |
|                                                                                  | Area Counts:          | 1.09e+006                                               |
|                                                                                  | ISTD Area Counts:     | N/A                                                     |
|  | <b>Compound Name:</b> | F4 (342.000/159.100 Da)                                 |
|                                                                                  | Expected RT:          | 25.9                                                    |
|                                                                                  | Actual RT:            | 25.9                                                    |
|                                                                                  | Equation:             | At least 2 points are required to calculate regression. |
|                                                                                  | Area Counts:          | 1.79e+006                                               |
|                                                                                  | ISTD Area Counts:     | N/A                                                     |
|                                                                                  | Amount:               | 0.00 (ng/mL)                                            |
|                                                                                  |                       |                                                         |
|                                                                                  |                       |                                                         |
|                                                                                  |                       |                                                         |
|                                                                                  |                       |                                                         |
|                                                                                  |                       |                                                         |

Figure S21 The LC chromatogram of plums treated with 0.004 a.i. g/L propiconazole at 25 d (4°C)



Figure Caption  
Figure\_22\_SuppInfo.

|                           |                          |                          |                                      |
|---------------------------|--------------------------|--------------------------|--------------------------------------|
| <b>Data File</b>          | 20220822 BHZ-YP-4du.wiff | <b>Result Table</b>      | 4-0.004-35d-3.rdb                    |
| <b>Acquisition Date</b>   | 8/22/2022 7:25:01 PM     | <b>Algorithm Used</b>    | MQL                                  |
| <b>Acquisition Method</b> | BHZ method.dam           | <b>Instrument Name</b>   | AB SCIEX Triple Quad 4500            |
| <b>Project</b>            | DPY                      | <b>Processing Method</b> | <i>No data for Processing Method</i> |

Sample Name: 0.004-35d-3 Vial #: 7

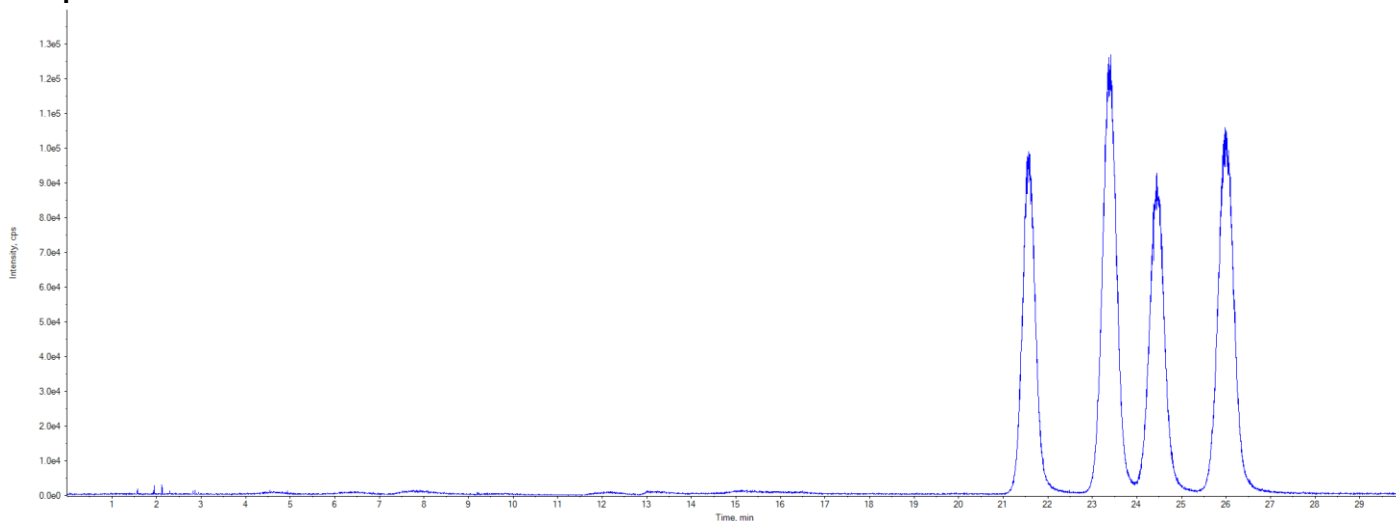

|                           |                                   |                         |                   |
|---------------------------|-----------------------------------|-------------------------|-------------------|
| <b>Sample Name</b>        | 0.004-35d-3                       | <b>Injection Vial</b>   | 7                 |
| <b>Data File</b>          | 20220822 BHZ-YP-4du.wiff          | <b>Injection Volume</b> | 10                |
| <b>Acquisition Date</b>   | 8/22/2022 7:25:01 PM              | <b>Algorithm Used</b>   | MQL               |
| <b>Acquisition Method</b> | BHZ method.dam                    | <b>Sample Type</b>      | Unknown           |
| <b>Instrument Name</b>    | AB SCIEX Triple Quad 4500         | <b>Result Table</b>     | 4-0.004-35d-3.rdb |
| <b>Sample ID</b>          | <i>No data for Sample ID</i>      | <b>Dilution Factor</b>  | 1.00              |
| <b>Sample Comment</b>     | <i>No data for Sample Comment</i> | <b>Weight to Volume</b> | 0.00              |

Approved By (Date and Initials): \_\_\_\_\_.

|  |                       |                                                         |
|--|-----------------------|---------------------------------------------------------|
|  | <b>Compound Name:</b> | F1 (342.000/159.100 Da)                                 |
|  | Expected RT:          | 21.5                                                    |
|  | Actual RT:            | 21.5                                                    |
|  | Equation:             | At least 2 points are required to calculate regression. |
|  | Area Counts:          | 1.63e+006                                               |
|  | ISTD Area Counts:     | N/A                                                     |
|  | Amount:               | 0.00 (ng/mL)                                            |

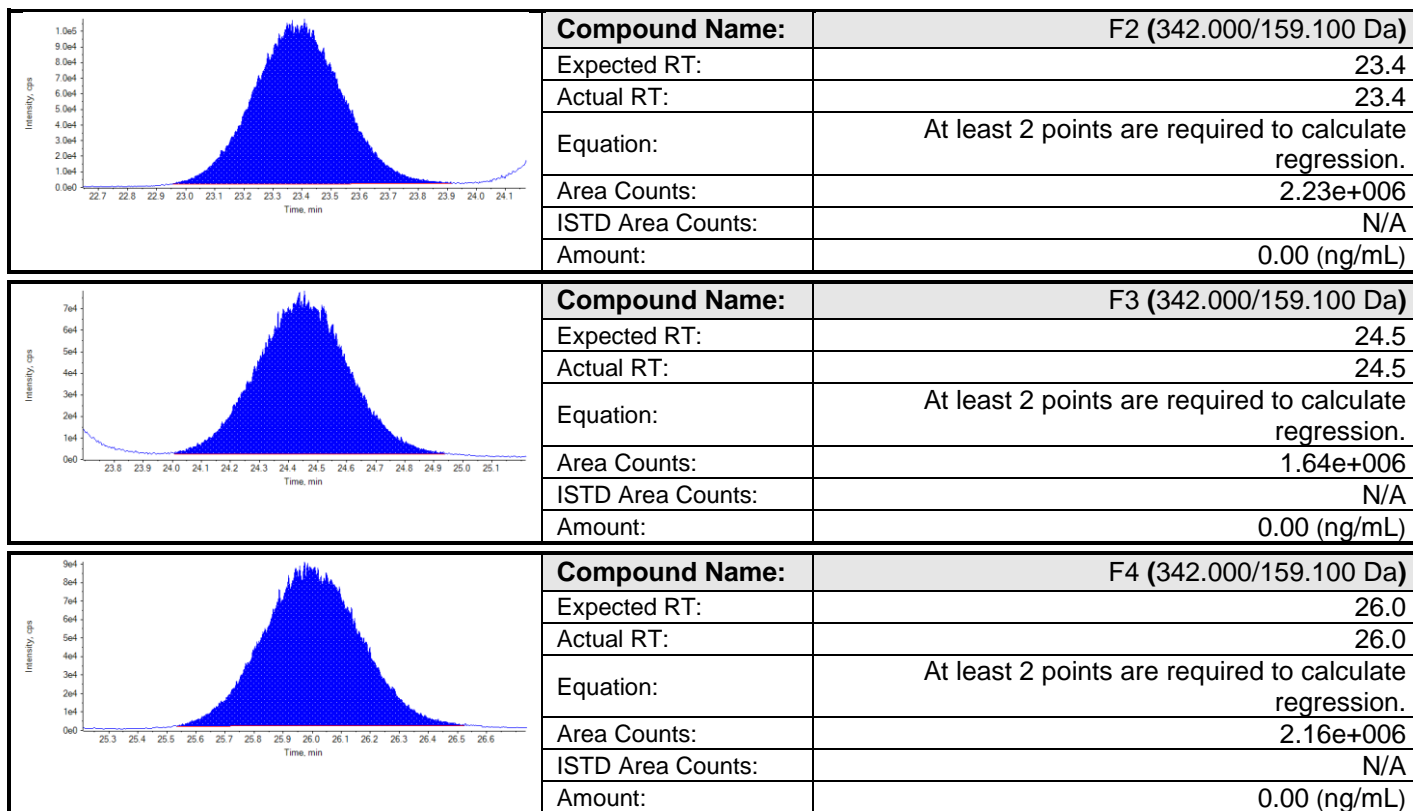

Figure S22 The LC chromatogram of plums treated with 0.004 a.i. g/L propiconazole at 35 d (4°C)



Figure Caption  
 Figure\_23\_SuppInfo.

|                           |                      |                          |                                      |
|---------------------------|----------------------|--------------------------|--------------------------------------|
| <b>Data File</b>          | BHZ 20220911.wiff    | <b>Result Table</b>      | 4-0.004-45d-3.rdb                    |
| <b>Acquisition Date</b>   | 9/11/2022 8:18:00 PM | <b>Algorithm Used</b>    | MQL                                  |
| <b>Acquisition Method</b> | BHZ method.dam       | <b>Instrument Name</b>   | AB SCIEX Triple Quad 4500            |
| <b>Project</b>            | DPY                  | <b>Processing Method</b> | <i>No data for Processing Method</i> |

**Sample Name:** 4-0.004-45d-3 **Vial #:** 23

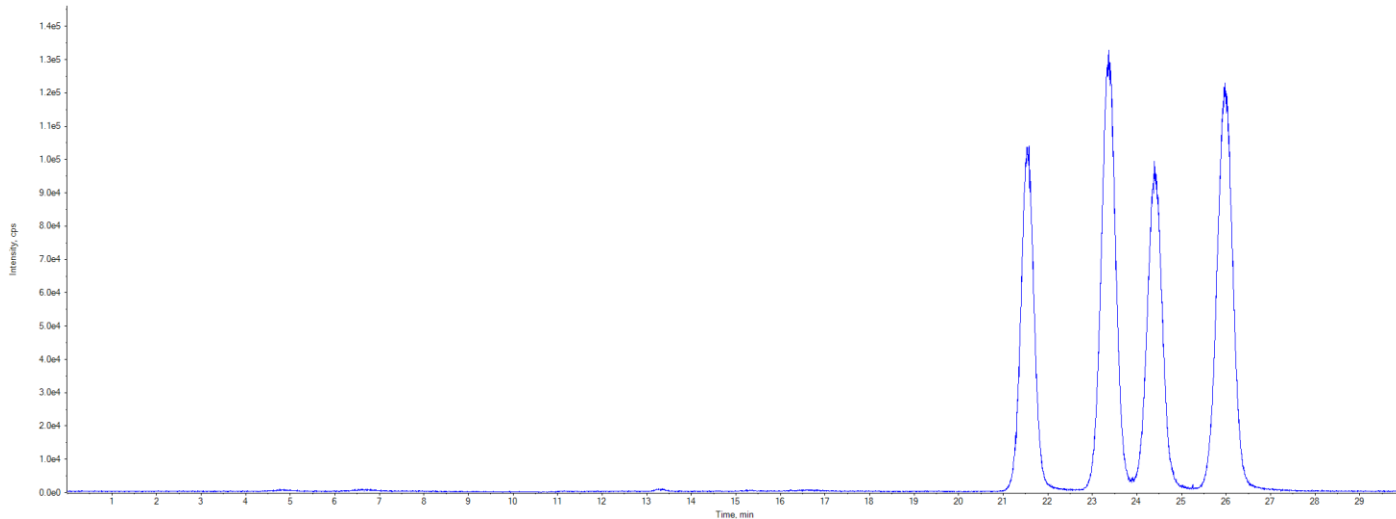

|                           |                                   |                         |                   |
|---------------------------|-----------------------------------|-------------------------|-------------------|
| <b>Sample Name</b>        | 4-0.004-45d-3                     | <b>Injection Vial</b>   | 23                |
| <b>Data File</b>          | BHZ 20220911.wiff                 | <b>Injection Volume</b> | 10                |
| <b>Acquisition Date</b>   | 9/11/2022 8:18:00 PM              | <b>Algorithm Used</b>   | MQL               |
| <b>Acquisition Method</b> | BHZ method.dam                    | <b>Sample Type</b>      | Unknown           |
| <b>Instrument Name</b>    | AB SCIEX Triple Quad 4500         | <b>Result Table</b>     | 4-0.004-45d-3.rdb |
| <b>Sample ID</b>          | <i>No data for Sample ID</i>      | <b>Dilution Factor</b>  | 1.00              |
| <b>Sample Comment</b>     | <i>No data for Sample Comment</i> | <b>Weight to Volume</b> | 0.00              |

Approved By (Date and Initials): \_\_\_\_\_.

|                                                                                                                                                                               |                       |                                                         |
|-------------------------------------------------------------------------------------------------------------------------------------------------------------------------------|-----------------------|---------------------------------------------------------|
| <p>The zoomed-in chromatogram shows a single, well-resolved peak at 21.6 minutes. The x-axis ranges from 20.9 to 22.2 minutes, and the y-axis ranges from 0e0 to 8e4 cps.</p> | <b>Compound Name:</b> | F1 (342.000/159.100 Da)                                 |
|                                                                                                                                                                               | Expected RT:          | 21.6                                                    |
|                                                                                                                                                                               | Actual RT:            | 21.6                                                    |
|                                                                                                                                                                               | Equation:             | At least 2 points are required to calculate regression. |
|                                                                                                                                                                               | Area Counts:          | 1.79e+006                                               |
|                                                                                                                                                                               | ISTD Area Counts:     | N/A                                                     |
|                                                                                                                                                                               | Amount:               | 0.00 (ng/mL)                                            |

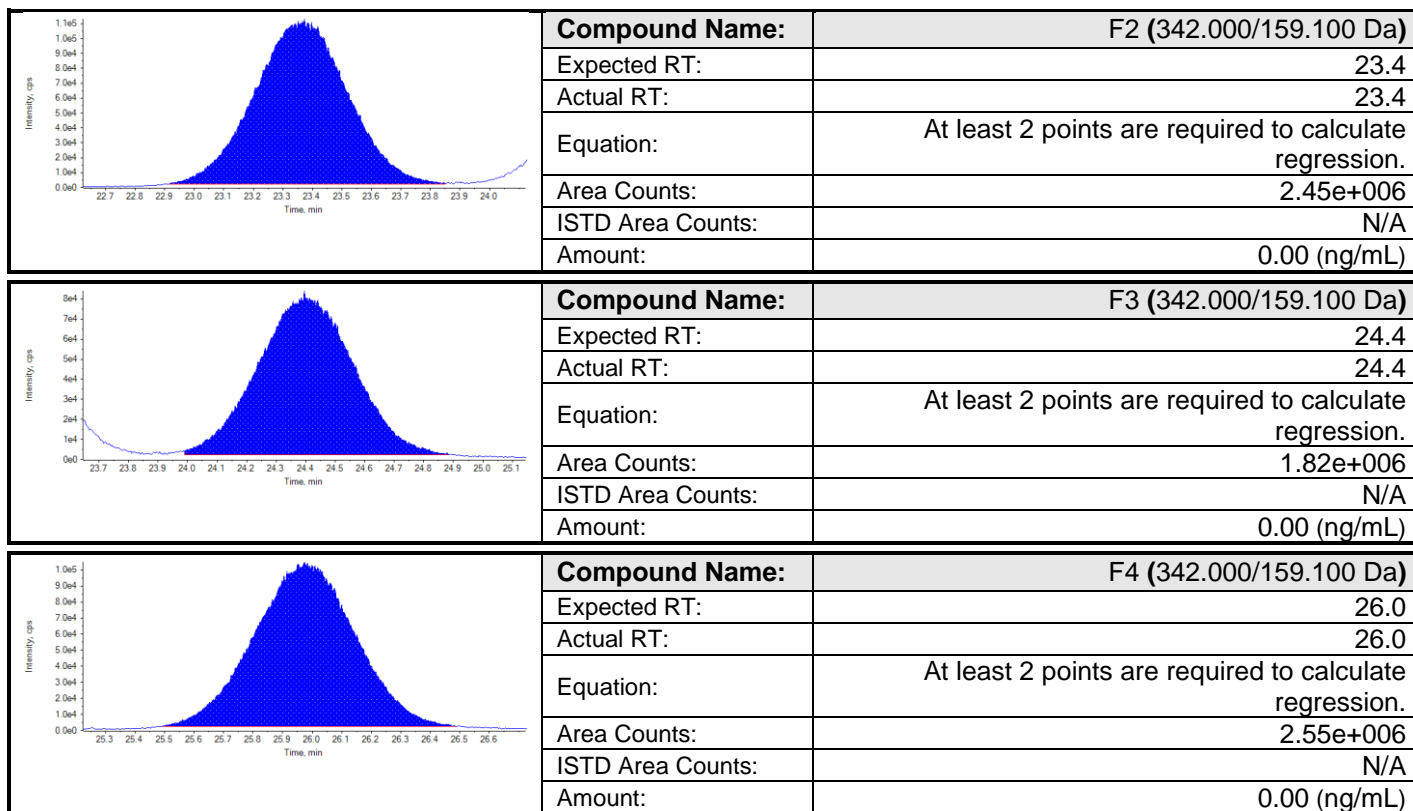

Figure 23 The LC chromatogram of plums treated with 0.004 a.i. g/L propiconazole at 45 d (4°C)



Figure Caption  
 Figure\_24\_SuppInfo.

|                           |                      |                          |                                      |
|---------------------------|----------------------|--------------------------|--------------------------------------|
| <b>Data File</b>          | BHZ 20220911.wiff    | <b>Result Table</b>      | 4-0.004-55d-3.rdb                    |
| <b>Acquisition Date</b>   | 9/11/2022 6:43:40 PM | <b>Algorithm Used</b>    | MQL                                  |
| <b>Acquisition Method</b> | BHZ method.dam       | <b>Instrument Name</b>   | AB SCIEX Triple Quad 4500            |
| <b>Project</b>            | DPY                  | <b>Processing Method</b> | <i>No data for Processing Method</i> |

**Sample Name:** 4-0.004-55d-3 **Vial #:** 20

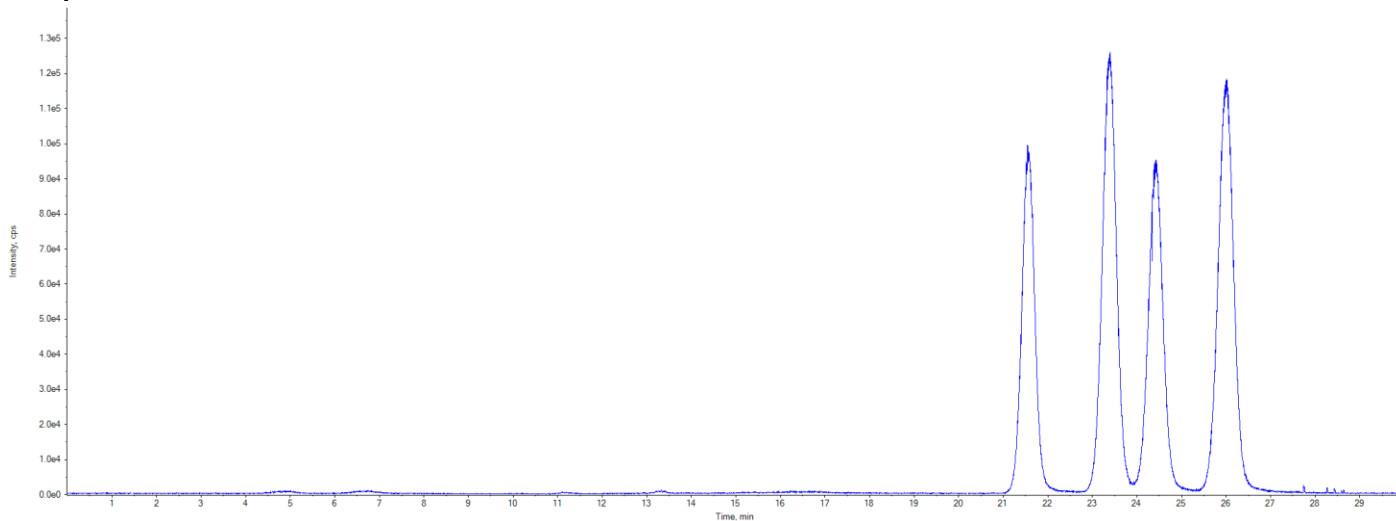

|                           |                                   |                         |                   |
|---------------------------|-----------------------------------|-------------------------|-------------------|
| <b>Sample Name</b>        | 4-0.004-55d-3                     | <b>Injection Vial</b>   | 20                |
| <b>Data File</b>          | BHZ 20220911.wiff                 | <b>Injection Volume</b> | 10                |
| <b>Acquisition Date</b>   | 9/11/2022 6:43:40 PM              | <b>Algorithm Used</b>   | MQL               |
| <b>Acquisition Method</b> | BHZ method.dam                    | <b>Sample Type</b>      | Unknown           |
| <b>Instrument Name</b>    | AB SCIEX Triple Quad 4500         | <b>Result Table</b>     | 4-0.004-55d-3.rdb |
| <b>Sample ID</b>          | <i>No data for Sample ID</i>      | <b>Dilution Factor</b>  | 1.00              |
| <b>Sample Comment</b>     | <i>No data for Sample Comment</i> | <b>Weight to Volume</b> | 0.00              |

Approved By (Date and Initials): \_\_\_\_\_.

|  |                       |                                                         |
|--|-----------------------|---------------------------------------------------------|
|  | <b>Compound Name:</b> | F1 (342.000/159.100 Da)                                 |
|  | Expected RT:          | 21.5                                                    |
|  | Actual RT:            | 21.5                                                    |
|  | Equation:             | At least 2 points are required to calculate regression. |
|  | Area Counts:          | 1.67e+006                                               |
|  | ISTD Area Counts:     | N/A                                                     |
|  | Amount:               | 0.00 (ng/mL)                                            |



|                                                                                  |                       |                                                         |
|----------------------------------------------------------------------------------|-----------------------|---------------------------------------------------------|
| 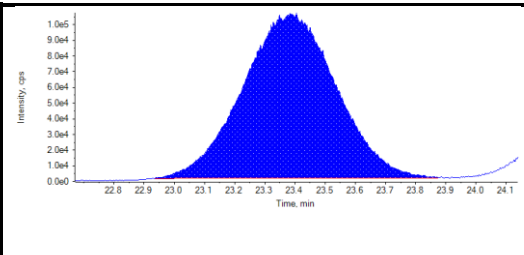 | <b>Compound Name:</b> | F2 (342.000/159.100 Da)                                 |
|                                                                                  | Expected RT:          | 23.4                                                    |
|                                                                                  | Actual RT:            | 23.4                                                    |
|                                                                                  | Equation:             | At least 2 points are required to calculate regression. |
|                                                                                  | Area Counts:          | 2.31e+006                                               |
|                                                                                  | ISTD Area Counts:     | N/A                                                     |
|  | <b>Compound Name:</b> | F3 (342.000/159.100 Da)                                 |
|                                                                                  | Expected RT:          | 24.4                                                    |
|                                                                                  | Actual RT:            | 24.4                                                    |
|                                                                                  | Equation:             | At least 2 points are required to calculate regression. |
|                                                                                  | Area Counts:          | 1.74e+006                                               |
|                                                                                  | ISTD Area Counts:     | N/A                                                     |
|  | <b>Compound Name:</b> | F4 (342.000/159.100 Da)                                 |
|                                                                                  | Expected RT:          | 26.0                                                    |
|                                                                                  | Actual RT:            | 26.0                                                    |
|                                                                                  | Equation:             | At least 2 points are required to calculate regression. |
|                                                                                  | Area Counts:          | 2.42e+006                                               |
|                                                                                  | ISTD Area Counts:     | N/A                                                     |
|                                                                                  | Amount:               | 0.00 (ng/mL)                                            |
|                                                                                  |                       |                                                         |
|                                                                                  |                       |                                                         |
|                                                                                  |                       |                                                         |
|                                                                                  |                       |                                                         |
|                                                                                  |                       |                                                         |

Figure S24 The LC chromatogram of plums treated with 0.004 a.i. g/L propiconazole at 55 d (4°C)



Figure Caption  
 Figure\_25\_SuppInfo.

|                           |                          |                          |                                      |
|---------------------------|--------------------------|--------------------------|--------------------------------------|
| <b>Data File</b>          | 20220822 BHZ-YP-4du.wiff | <b>Result Table</b>      | 4-0.02-5d-2.rdb                      |
| <b>Acquisition Date</b>   | 8/22/2022 3:44:47 PM     | <b>Algorithm Used</b>    | MQL                                  |
| <b>Acquisition Method</b> | BHZ method.dam           | <b>Instrument Name</b>   | AB SCIEX Triple Quad 4500            |
| <b>Project</b>            | DPY                      | <b>Processing Method</b> | <i>No data for Processing Method</i> |

**Sample Name:** 0.02-5d-2 **Vial #:** 104

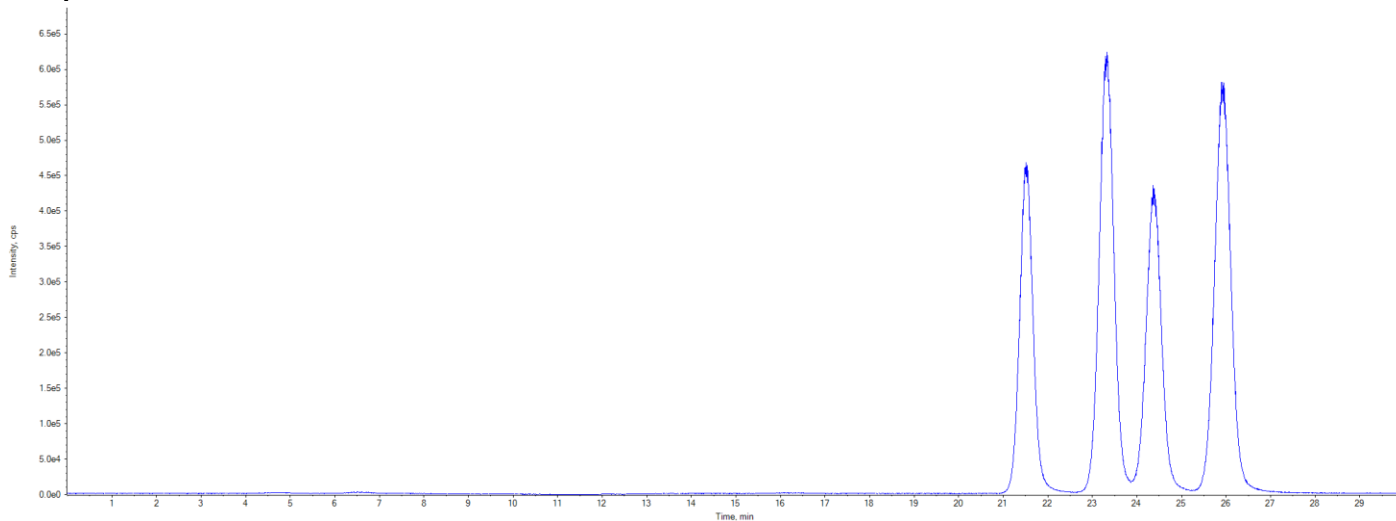

|                           |                                   |                         |                 |
|---------------------------|-----------------------------------|-------------------------|-----------------|
| <b>Sample Name</b>        | 0.02-5d-2                         | <b>Injection Vial</b>   | 104             |
| <b>Data File</b>          | 20220822 BHZ-YP-4du.wiff          | <b>Injection Volume</b> | 10              |
| <b>Acquisition Date</b>   | 8/22/2022 3:44:47 PM              | <b>Algorithm Used</b>   | MQL             |
| <b>Acquisition Method</b> | BHZ method.dam                    | <b>Sample Type</b>      | Unknown         |
| <b>Instrument Name</b>    | AB SCIEX Triple Quad 4500         | <b>Result Table</b>     | 4-0.02-5d-2.rdb |
| <b>Sample ID</b>          | <i>No data for Sample ID</i>      | <b>Dilution Factor</b>  | 1.00            |
| <b>Sample Comment</b>     | <i>No data for Sample Comment</i> | <b>Weight to Volume</b> | 0.00            |

Approved By (Date and Initials): \_\_\_\_\_.

|                                                                                                                                                                                   |                       |                                                         |
|-----------------------------------------------------------------------------------------------------------------------------------------------------------------------------------|-----------------------|---------------------------------------------------------|
| <p>The zoomed-in chromatogram shows a single, well-resolved peak at 21.5 minutes. The x-axis ranges from 20.9 to 22.1 minutes, and the y-axis ranges from 0.0e0 to 3.5e5 cps.</p> | <b>Compound Name:</b> | F1 (342.000/159.100 Da)                                 |
|                                                                                                                                                                                   | Expected RT:          | 21.5                                                    |
|                                                                                                                                                                                   | Actual RT:            | 21.5                                                    |
|                                                                                                                                                                                   | Equation:             | At least 2 points are required to calculate regression. |
|                                                                                                                                                                                   | Area Counts:          | 8.15e+006                                               |
|                                                                                                                                                                                   | ISTD Area Counts:     | N/A                                                     |
|                                                                                                                                                                                   | Amount:               | 0.00 (ng/mL)                                            |

|                                                                                   |                       |                                                         |
|-----------------------------------------------------------------------------------|-----------------------|---------------------------------------------------------|
| 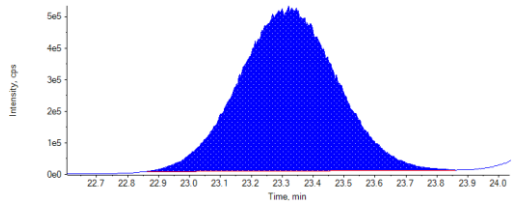 | <b>Compound Name:</b> | F2 (342.000/159.100 Da)                                 |
|                                                                                   | Expected RT:          | 23.3                                                    |
|                                                                                   | Actual RT:            | 23.3                                                    |
|                                                                                   | Equation:             | At least 2 points are required to calculate regression. |
|                                                                                   | Area Counts:          | 1.17e+007                                               |
|                                                                                   | ISTD Area Counts:     | N/A                                                     |
|  | <b>Compound Name:</b> | F3 (342.000/159.100 Da)                                 |
|                                                                                   | Expected RT:          | 24.4                                                    |
|                                                                                   | Actual RT:            | 24.4                                                    |
|                                                                                   | Equation:             | At least 2 points are required to calculate regression. |
|                                                                                   | Area Counts:          | 8.09e+006                                               |
|                                                                                   | ISTD Area Counts:     | N/A                                                     |
|  | <b>Compound Name:</b> | F4 (342.000/159.100 Da)                                 |
|                                                                                   | Expected RT:          | 26.0                                                    |
|                                                                                   | Actual RT:            | 25.9                                                    |
|                                                                                   | Equation:             | At least 2 points are required to calculate regression. |
|                                                                                   | Area Counts:          | 1.24e+007                                               |
|                                                                                   | ISTD Area Counts:     | N/A                                                     |
|                                                                                   | Amount:               | 0.00 (ng/mL)                                            |
|                                                                                   |                       |                                                         |
|                                                                                   |                       |                                                         |
|                                                                                   |                       |                                                         |
|                                                                                   |                       |                                                         |
|                                                                                   |                       |                                                         |

Figure S25 The LC chromatogram of plums treated with 0.020 a.i. g/L propiconazole at 5 d (4°C)



Figure Caption  
 Figure\_26\_SuppInfo.

|                           |                          |                          |                                      |
|---------------------------|--------------------------|--------------------------|--------------------------------------|
| <b>Data File</b>          | 20220822 BHZ-YP-4du.wiff | <b>Result Table</b>      | 4-0.02-10d-3.rdb                     |
| <b>Acquisition Date</b>   | 8/22/2022 2:41:55 PM     | <b>Algorithm Used</b>    | MQL                                  |
| <b>Acquisition Method</b> | BHZ method.dam           | <b>Instrument Name</b>   | AB SCIEX Triple Quad 4500            |
| <b>Project</b>            | DPY                      | <b>Processing Method</b> | <i>No data for Processing Method</i> |

Sample Name: 0.02-10d-3 Vial #: 102

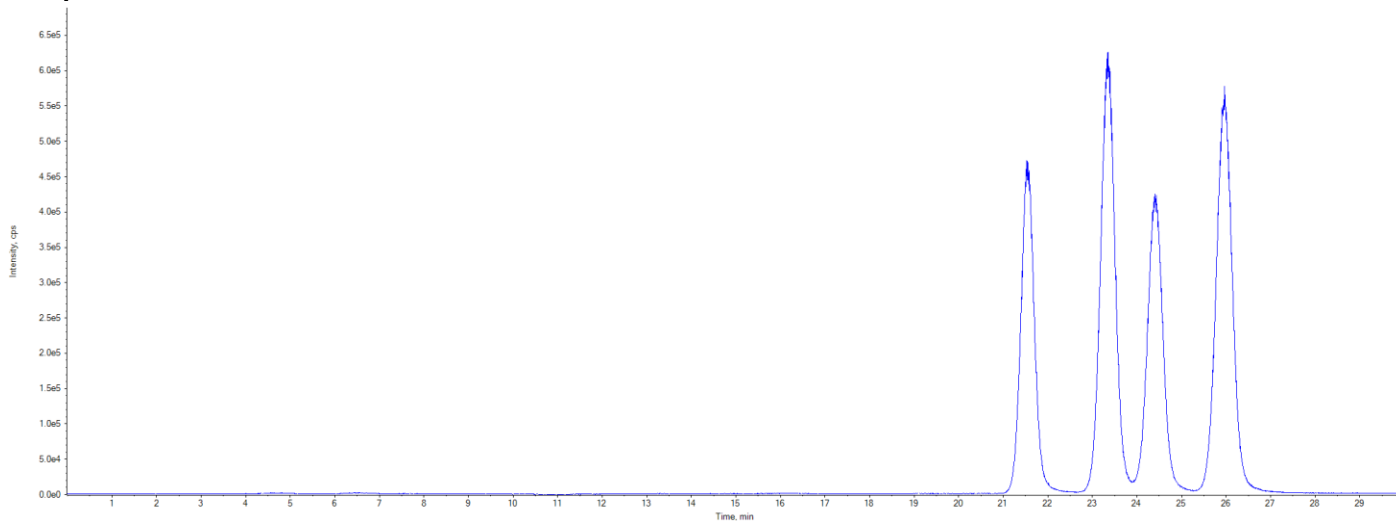

|                           |                                   |                         |                  |
|---------------------------|-----------------------------------|-------------------------|------------------|
| <b>Sample Name</b>        | 0.02-10d-3                        | <b>Injection Vial</b>   | 102              |
| <b>Data File</b>          | 20220822 BHZ-YP-4du.wiff          | <b>Injection Volume</b> | 10               |
| <b>Acquisition Date</b>   | 8/22/2022 2:41:55 PM              | <b>Algorithm Used</b>   | MQL              |
| <b>Acquisition Method</b> | BHZ method.dam                    | <b>Sample Type</b>      | Unknown          |
| <b>Instrument Name</b>    | AB SCIEX Triple Quad 4500         | <b>Result Table</b>     | 4-0.02-10d-3.rdb |
| <b>Sample ID</b>          | <i>No data for Sample ID</i>      | <b>Dilution Factor</b>  | 1.00             |
| <b>Sample Comment</b>     | <i>No data for Sample Comment</i> | <b>Weight to Volume</b> | 0.00             |

Approved By (Date and Initials): \_\_\_\_\_.

|                                                                                                                                                                                                        |                       |                                                         |
|--------------------------------------------------------------------------------------------------------------------------------------------------------------------------------------------------------|-----------------------|---------------------------------------------------------|
| <p>The zoomed-in chromatogram shows a single, well-resolved peak at a retention time of 21.5 minutes. The intensity ranges from 0.0e0 to 3.5e5 cps over a time interval from 20.9 to 22.2 minutes.</p> | <b>Compound Name:</b> | F1 (342.000/159.100 Da)                                 |
|                                                                                                                                                                                                        | Expected RT:          | 21.5                                                    |
|                                                                                                                                                                                                        | Actual RT:            | 21.5                                                    |
|                                                                                                                                                                                                        | Equation:             | At least 2 points are required to calculate regression. |
|                                                                                                                                                                                                        | Area Counts:          | 8.14e+006                                               |
|                                                                                                                                                                                                        | ISTD Area Counts:     | N/A                                                     |
|                                                                                                                                                                                                        | Amount:               | 0.00 (ng/mL)                                            |

|                                                                                   |                                                                                                                                                                                                                                                                                                                                                                                                                                          |                       |                                |              |      |            |      |           |                                                         |              |           |                   |     |         |              |
|-----------------------------------------------------------------------------------|------------------------------------------------------------------------------------------------------------------------------------------------------------------------------------------------------------------------------------------------------------------------------------------------------------------------------------------------------------------------------------------------------------------------------------------|-----------------------|--------------------------------|--------------|------|------------|------|-----------|---------------------------------------------------------|--------------|-----------|-------------------|-----|---------|--------------|
| 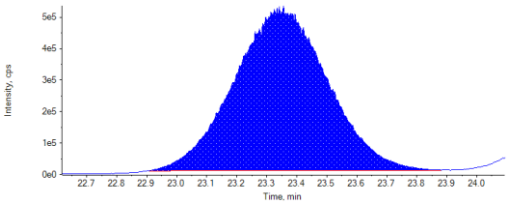 | <table> <tr> <td><b>Compound Name:</b></td><td><b>F2 (342.000/159.100 Da)</b></td></tr> <tr> <td>Expected RT:</td><td>23.4</td></tr> <tr> <td>Actual RT:</td><td>23.4</td></tr> <tr> <td>Equation:</td><td>At least 2 points are required to calculate regression.</td></tr> <tr> <td>Area Counts:</td><td>1.14e+007</td></tr> <tr> <td>ISTD Area Counts:</td><td>N/A</td></tr> <tr> <td>Amount:</td><td>0.00 (ng/mL)</td></tr> </table> | <b>Compound Name:</b> | <b>F2 (342.000/159.100 Da)</b> | Expected RT: | 23.4 | Actual RT: | 23.4 | Equation: | At least 2 points are required to calculate regression. | Area Counts: | 1.14e+007 | ISTD Area Counts: | N/A | Amount: | 0.00 (ng/mL) |
| <b>Compound Name:</b>                                                             | <b>F2 (342.000/159.100 Da)</b>                                                                                                                                                                                                                                                                                                                                                                                                           |                       |                                |              |      |            |      |           |                                                         |              |           |                   |     |         |              |
| Expected RT:                                                                      | 23.4                                                                                                                                                                                                                                                                                                                                                                                                                                     |                       |                                |              |      |            |      |           |                                                         |              |           |                   |     |         |              |
| Actual RT:                                                                        | 23.4                                                                                                                                                                                                                                                                                                                                                                                                                                     |                       |                                |              |      |            |      |           |                                                         |              |           |                   |     |         |              |
| Equation:                                                                         | At least 2 points are required to calculate regression.                                                                                                                                                                                                                                                                                                                                                                                  |                       |                                |              |      |            |      |           |                                                         |              |           |                   |     |         |              |
| Area Counts:                                                                      | 1.14e+007                                                                                                                                                                                                                                                                                                                                                                                                                                |                       |                                |              |      |            |      |           |                                                         |              |           |                   |     |         |              |
| ISTD Area Counts:                                                                 | N/A                                                                                                                                                                                                                                                                                                                                                                                                                                      |                       |                                |              |      |            |      |           |                                                         |              |           |                   |     |         |              |
| Amount:                                                                           | 0.00 (ng/mL)                                                                                                                                                                                                                                                                                                                                                                                                                             |                       |                                |              |      |            |      |           |                                                         |              |           |                   |     |         |              |
|  | <table> <tr> <td><b>Compound Name:</b></td><td><b>F3 (342.000/159.100 Da)</b></td></tr> <tr> <td>Expected RT:</td><td>24.4</td></tr> <tr> <td>Actual RT:</td><td>24.4</td></tr> <tr> <td>Equation:</td><td>At least 2 points are required to calculate regression.</td></tr> <tr> <td>Area Counts:</td><td>7.96e+006</td></tr> <tr> <td>ISTD Area Counts:</td><td>N/A</td></tr> <tr> <td>Amount:</td><td>0.00 (ng/mL)</td></tr> </table> | <b>Compound Name:</b> | <b>F3 (342.000/159.100 Da)</b> | Expected RT: | 24.4 | Actual RT: | 24.4 | Equation: | At least 2 points are required to calculate regression. | Area Counts: | 7.96e+006 | ISTD Area Counts: | N/A | Amount: | 0.00 (ng/mL) |
| <b>Compound Name:</b>                                                             | <b>F3 (342.000/159.100 Da)</b>                                                                                                                                                                                                                                                                                                                                                                                                           |                       |                                |              |      |            |      |           |                                                         |              |           |                   |     |         |              |
| Expected RT:                                                                      | 24.4                                                                                                                                                                                                                                                                                                                                                                                                                                     |                       |                                |              |      |            |      |           |                                                         |              |           |                   |     |         |              |
| Actual RT:                                                                        | 24.4                                                                                                                                                                                                                                                                                                                                                                                                                                     |                       |                                |              |      |            |      |           |                                                         |              |           |                   |     |         |              |
| Equation:                                                                         | At least 2 points are required to calculate regression.                                                                                                                                                                                                                                                                                                                                                                                  |                       |                                |              |      |            |      |           |                                                         |              |           |                   |     |         |              |
| Area Counts:                                                                      | 7.96e+006                                                                                                                                                                                                                                                                                                                                                                                                                                |                       |                                |              |      |            |      |           |                                                         |              |           |                   |     |         |              |
| ISTD Area Counts:                                                                 | N/A                                                                                                                                                                                                                                                                                                                                                                                                                                      |                       |                                |              |      |            |      |           |                                                         |              |           |                   |     |         |              |
| Amount:                                                                           | 0.00 (ng/mL)                                                                                                                                                                                                                                                                                                                                                                                                                             |                       |                                |              |      |            |      |           |                                                         |              |           |                   |     |         |              |
|  | <table> <tr> <td><b>Compound Name:</b></td><td><b>F4 (342.000/159.100 Da)</b></td></tr> <tr> <td>Expected RT:</td><td>26.0</td></tr> <tr> <td>Actual RT:</td><td>26.0</td></tr> <tr> <td>Equation:</td><td>At least 2 points are required to calculate regression.</td></tr> <tr> <td>Area Counts:</td><td>1.19e+007</td></tr> <tr> <td>ISTD Area Counts:</td><td>N/A</td></tr> <tr> <td>Amount:</td><td>0.00 (ng/mL)</td></tr> </table> | <b>Compound Name:</b> | <b>F4 (342.000/159.100 Da)</b> | Expected RT: | 26.0 | Actual RT: | 26.0 | Equation: | At least 2 points are required to calculate regression. | Area Counts: | 1.19e+007 | ISTD Area Counts: | N/A | Amount: | 0.00 (ng/mL) |
| <b>Compound Name:</b>                                                             | <b>F4 (342.000/159.100 Da)</b>                                                                                                                                                                                                                                                                                                                                                                                                           |                       |                                |              |      |            |      |           |                                                         |              |           |                   |     |         |              |
| Expected RT:                                                                      | 26.0                                                                                                                                                                                                                                                                                                                                                                                                                                     |                       |                                |              |      |            |      |           |                                                         |              |           |                   |     |         |              |
| Actual RT:                                                                        | 26.0                                                                                                                                                                                                                                                                                                                                                                                                                                     |                       |                                |              |      |            |      |           |                                                         |              |           |                   |     |         |              |
| Equation:                                                                         | At least 2 points are required to calculate regression.                                                                                                                                                                                                                                                                                                                                                                                  |                       |                                |              |      |            |      |           |                                                         |              |           |                   |     |         |              |
| Area Counts:                                                                      | 1.19e+007                                                                                                                                                                                                                                                                                                                                                                                                                                |                       |                                |              |      |            |      |           |                                                         |              |           |                   |     |         |              |
| ISTD Area Counts:                                                                 | N/A                                                                                                                                                                                                                                                                                                                                                                                                                                      |                       |                                |              |      |            |      |           |                                                         |              |           |                   |     |         |              |
| Amount:                                                                           | 0.00 (ng/mL)                                                                                                                                                                                                                                                                                                                                                                                                                             |                       |                                |              |      |            |      |           |                                                         |              |           |                   |     |         |              |

Figure S26 The LC chromatogram of plums treated with 0.020 a.i. g/L propiconazole at 10 d (4°C)



Figure Caption  
 Figure\_27\_SuppInfo.

|                           |                          |                          |                                      |
|---------------------------|--------------------------|--------------------------|--------------------------------------|
| <b>Data File</b>          | 20220822 BHZ-YP-4du.wiff | <b>Result Table</b>      | 4-0.02-15d-2.rdb                     |
| <b>Acquisition Date</b>   | 8/22/2022 12:36:07 PM    | <b>Algorithm Used</b>    | MQL                                  |
| <b>Acquisition Method</b> | BHZ method.dam           | <b>Instrument Name</b>   | AB SCIEX Triple Quad 4500            |
| <b>Project</b>            | DPY                      | <b>Processing Method</b> | <i>No data for Processing Method</i> |

Sample Name: 0.02-15d-2 Vial #: 98

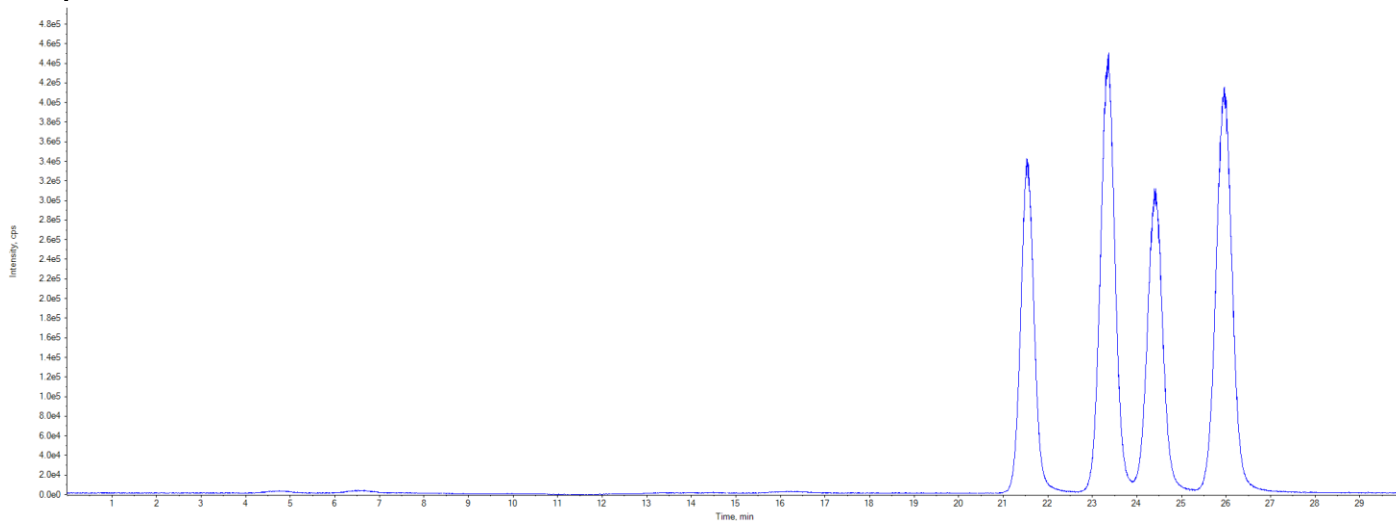

|                           |                                   |                         |                  |
|---------------------------|-----------------------------------|-------------------------|------------------|
| <b>Sample Name</b>        | 0.02-15d-2                        | <b>Injection Vial</b>   | 98               |
| <b>Data File</b>          | 20220822 BHZ-YP-4du.wiff          | <b>Injection Volume</b> | 10               |
| <b>Acquisition Date</b>   | 8/22/2022 12:36:07 PM             | <b>Algorithm Used</b>   | MQL              |
| <b>Acquisition Method</b> | BHZ method.dam                    | <b>Sample Type</b>      | Unknown          |
| <b>Instrument Name</b>    | AB SCIEX Triple Quad 4500         | <b>Result Table</b>     | 4-0.02-15d-2.rdb |
| <b>Sample ID</b>          | <i>No data for Sample ID</i>      | <b>Dilution Factor</b>  | 1.00             |
| <b>Sample Comment</b>     | <i>No data for Sample Comment</i> | <b>Weight to Volume</b> | 0.00             |

Approved By (Date and Initials): \_\_\_\_\_.

|                                                                                                                                                                       |                       |                                                         |
|-----------------------------------------------------------------------------------------------------------------------------------------------------------------------|-----------------------|---------------------------------------------------------|
| <p>The zoomed-in peak shows intensity (cps) on the y-axis (0.0e0 to 2.5e5) against time (min) on the x-axis (20.9 to 22.2). The peak is centered at 21.5 minutes.</p> | <b>Compound Name:</b> | F1 (342.000/159.100 Da)                                 |
|                                                                                                                                                                       | Expected RT:          | 21.5                                                    |
|                                                                                                                                                                       | Actual RT:            | 21.5                                                    |
|                                                                                                                                                                       | Equation:             | At least 2 points are required to calculate regression. |
|                                                                                                                                                                       | Area Counts:          | 5.87e+006                                               |
|                                                                                                                                                                       | ISTD Area Counts:     | N/A                                                     |
|                                                                                                                                                                       | Amount:               | 0.00 (ng/mL)                                            |

|                                                                                   |                                                                                                                                                                                                                                                                                                                                                                                                                                   |                       |                         |              |      |            |      |           |                                                         |              |           |                   |     |         |              |
|-----------------------------------------------------------------------------------|-----------------------------------------------------------------------------------------------------------------------------------------------------------------------------------------------------------------------------------------------------------------------------------------------------------------------------------------------------------------------------------------------------------------------------------|-----------------------|-------------------------|--------------|------|------------|------|-----------|---------------------------------------------------------|--------------|-----------|-------------------|-----|---------|--------------|
| 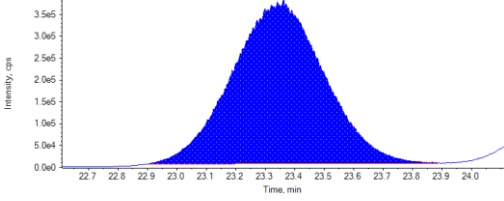 | <table> <tr> <td><b>Compound Name:</b></td><td>F2 (342.000/159.100 Da)</td></tr> <tr> <td>Expected RT:</td><td>23.4</td></tr> <tr> <td>Actual RT:</td><td>23.4</td></tr> <tr> <td>Equation:</td><td>At least 2 points are required to calculate regression.</td></tr> <tr> <td>Area Counts:</td><td>8.22e+006</td></tr> <tr> <td>ISTD Area Counts:</td><td>N/A</td></tr> <tr> <td>Amount:</td><td>0.00 (ng/mL)</td></tr> </table> | <b>Compound Name:</b> | F2 (342.000/159.100 Da) | Expected RT: | 23.4 | Actual RT: | 23.4 | Equation: | At least 2 points are required to calculate regression. | Area Counts: | 8.22e+006 | ISTD Area Counts: | N/A | Amount: | 0.00 (ng/mL) |
| <b>Compound Name:</b>                                                             | F2 (342.000/159.100 Da)                                                                                                                                                                                                                                                                                                                                                                                                           |                       |                         |              |      |            |      |           |                                                         |              |           |                   |     |         |              |
| Expected RT:                                                                      | 23.4                                                                                                                                                                                                                                                                                                                                                                                                                              |                       |                         |              |      |            |      |           |                                                         |              |           |                   |     |         |              |
| Actual RT:                                                                        | 23.4                                                                                                                                                                                                                                                                                                                                                                                                                              |                       |                         |              |      |            |      |           |                                                         |              |           |                   |     |         |              |
| Equation:                                                                         | At least 2 points are required to calculate regression.                                                                                                                                                                                                                                                                                                                                                                           |                       |                         |              |      |            |      |           |                                                         |              |           |                   |     |         |              |
| Area Counts:                                                                      | 8.22e+006                                                                                                                                                                                                                                                                                                                                                                                                                         |                       |                         |              |      |            |      |           |                                                         |              |           |                   |     |         |              |
| ISTD Area Counts:                                                                 | N/A                                                                                                                                                                                                                                                                                                                                                                                                                               |                       |                         |              |      |            |      |           |                                                         |              |           |                   |     |         |              |
| Amount:                                                                           | 0.00 (ng/mL)                                                                                                                                                                                                                                                                                                                                                                                                                      |                       |                         |              |      |            |      |           |                                                         |              |           |                   |     |         |              |
|  | <table> <tr> <td><b>Compound Name:</b></td><td>F3 (342.000/159.100 Da)</td></tr> <tr> <td>Expected RT:</td><td>24.4</td></tr> <tr> <td>Actual RT:</td><td>24.4</td></tr> <tr> <td>Equation:</td><td>At least 2 points are required to calculate regression.</td></tr> <tr> <td>Area Counts:</td><td>5.78e+006</td></tr> <tr> <td>ISTD Area Counts:</td><td>N/A</td></tr> <tr> <td>Amount:</td><td>0.00 (ng/mL)</td></tr> </table> | <b>Compound Name:</b> | F3 (342.000/159.100 Da) | Expected RT: | 24.4 | Actual RT: | 24.4 | Equation: | At least 2 points are required to calculate regression. | Area Counts: | 5.78e+006 | ISTD Area Counts: | N/A | Amount: | 0.00 (ng/mL) |
| <b>Compound Name:</b>                                                             | F3 (342.000/159.100 Da)                                                                                                                                                                                                                                                                                                                                                                                                           |                       |                         |              |      |            |      |           |                                                         |              |           |                   |     |         |              |
| Expected RT:                                                                      | 24.4                                                                                                                                                                                                                                                                                                                                                                                                                              |                       |                         |              |      |            |      |           |                                                         |              |           |                   |     |         |              |
| Actual RT:                                                                        | 24.4                                                                                                                                                                                                                                                                                                                                                                                                                              |                       |                         |              |      |            |      |           |                                                         |              |           |                   |     |         |              |
| Equation:                                                                         | At least 2 points are required to calculate regression.                                                                                                                                                                                                                                                                                                                                                                           |                       |                         |              |      |            |      |           |                                                         |              |           |                   |     |         |              |
| Area Counts:                                                                      | 5.78e+006                                                                                                                                                                                                                                                                                                                                                                                                                         |                       |                         |              |      |            |      |           |                                                         |              |           |                   |     |         |              |
| ISTD Area Counts:                                                                 | N/A                                                                                                                                                                                                                                                                                                                                                                                                                               |                       |                         |              |      |            |      |           |                                                         |              |           |                   |     |         |              |
| Amount:                                                                           | 0.00 (ng/mL)                                                                                                                                                                                                                                                                                                                                                                                                                      |                       |                         |              |      |            |      |           |                                                         |              |           |                   |     |         |              |
|  | <table> <tr> <td><b>Compound Name:</b></td><td>F4 (342.000/159.100 Da)</td></tr> <tr> <td>Expected RT:</td><td>26.0</td></tr> <tr> <td>Actual RT:</td><td>26.0</td></tr> <tr> <td>Equation:</td><td>At least 2 points are required to calculate regression.</td></tr> <tr> <td>Area Counts:</td><td>8.74e+006</td></tr> <tr> <td>ISTD Area Counts:</td><td>N/A</td></tr> <tr> <td>Amount:</td><td>0.00 (ng/mL)</td></tr> </table> | <b>Compound Name:</b> | F4 (342.000/159.100 Da) | Expected RT: | 26.0 | Actual RT: | 26.0 | Equation: | At least 2 points are required to calculate regression. | Area Counts: | 8.74e+006 | ISTD Area Counts: | N/A | Amount: | 0.00 (ng/mL) |
| <b>Compound Name:</b>                                                             | F4 (342.000/159.100 Da)                                                                                                                                                                                                                                                                                                                                                                                                           |                       |                         |              |      |            |      |           |                                                         |              |           |                   |     |         |              |
| Expected RT:                                                                      | 26.0                                                                                                                                                                                                                                                                                                                                                                                                                              |                       |                         |              |      |            |      |           |                                                         |              |           |                   |     |         |              |
| Actual RT:                                                                        | 26.0                                                                                                                                                                                                                                                                                                                                                                                                                              |                       |                         |              |      |            |      |           |                                                         |              |           |                   |     |         |              |
| Equation:                                                                         | At least 2 points are required to calculate regression.                                                                                                                                                                                                                                                                                                                                                                           |                       |                         |              |      |            |      |           |                                                         |              |           |                   |     |         |              |
| Area Counts:                                                                      | 8.74e+006                                                                                                                                                                                                                                                                                                                                                                                                                         |                       |                         |              |      |            |      |           |                                                         |              |           |                   |     |         |              |
| ISTD Area Counts:                                                                 | N/A                                                                                                                                                                                                                                                                                                                                                                                                                               |                       |                         |              |      |            |      |           |                                                         |              |           |                   |     |         |              |
| Amount:                                                                           | 0.00 (ng/mL)                                                                                                                                                                                                                                                                                                                                                                                                                      |                       |                         |              |      |            |      |           |                                                         |              |           |                   |     |         |              |

Figure S27 The LC chromatogram of plums treated with 0.020 a.i. g/L propiconazole at 15 d (4°C)



Figure Caption  
Figure\_28\_SuppInfo.

|                           |                          |                          |                                      |
|---------------------------|--------------------------|--------------------------|--------------------------------------|
| <b>Data File</b>          | 20220822 BHZ-YP-4du.wiff | <b>Result Table</b>      | 4-0.02-20d-1.rdb                     |
| <b>Acquisition Date</b>   | 8/22/2022 10:30:23 AM    | <b>Algorithm Used</b>    | MQL                                  |
| <b>Acquisition Method</b> | BHZ method.dam           | <b>Instrument Name</b>   | AB SCIEX Triple Quad 4500            |
| <b>Project</b>            | DPY                      | <b>Processing Method</b> | <i>No data for Processing Method</i> |

Sample Name: 0.02-20d-1 Vial #: 94

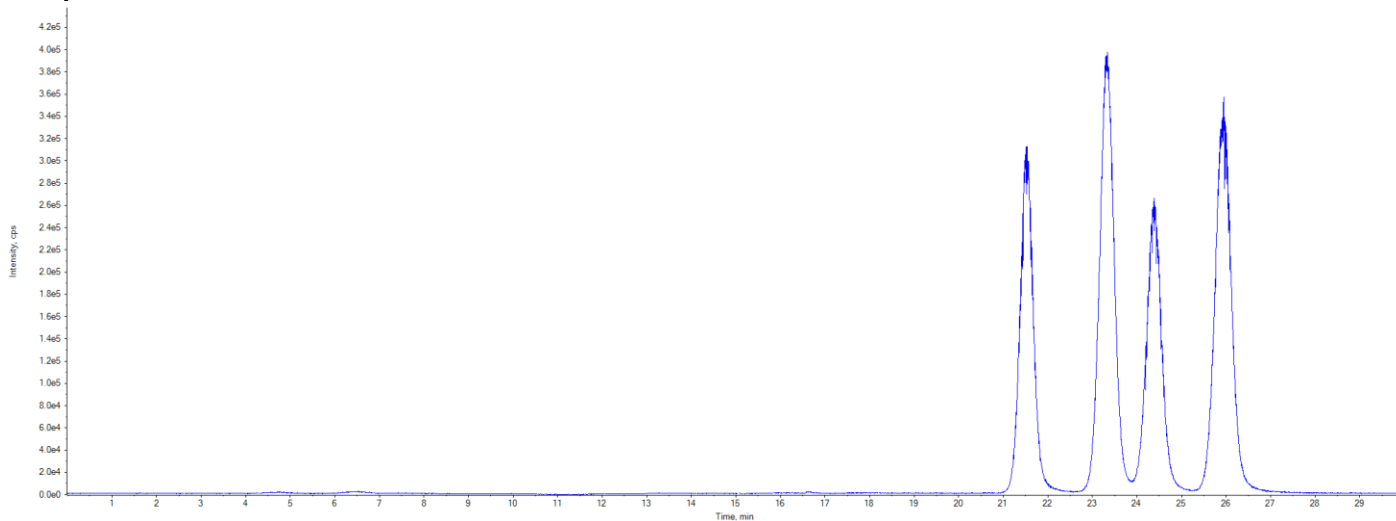

|                           |                                   |                         |                  |
|---------------------------|-----------------------------------|-------------------------|------------------|
| <b>Sample Name</b>        | 0.02-20d-1                        | <b>Injection Vial</b>   | 94               |
| <b>Data File</b>          | 20220822 BHZ-YP-4du.wiff          | <b>Injection Volume</b> | 10               |
| <b>Acquisition Date</b>   | 8/22/2022 10:30:23 AM             | <b>Algorithm Used</b>   | MQL              |
| <b>Acquisition Method</b> | BHZ method.dam                    | <b>Sample Type</b>      | Unknown          |
| <b>Instrument Name</b>    | AB SCIEX Triple Quad 4500         | <b>Result Table</b>     | 4-0.02-20d-1.rdb |
| <b>Sample ID</b>          | <i>No data for Sample ID</i>      | <b>Dilution Factor</b>  | 1.00             |
| <b>Sample Comment</b>     | <i>No data for Sample Comment</i> | <b>Weight to Volume</b> | 0.00             |

Approved By (Date and Initials): \_\_\_\_\_.

|  |                       |                                                         |
|--|-----------------------|---------------------------------------------------------|
|  | <b>Compound Name:</b> | F1 (342.000/159.100 Da)                                 |
|  | Expected RT:          | 21.5                                                    |
|  | Actual RT:            | 21.5                                                    |
|  | Equation:             | At least 2 points are required to calculate regression. |
|  | Area Counts:          | 5.28e+006                                               |
|  | ISTD Area Counts:     | N/A                                                     |
|  | Amount:               | 0.00 (ng/mL)                                            |



|                                                                                   |                                                                                                                                                                                                                                                                                                                                                                                                                                   |                       |                         |              |      |            |      |           |                                                         |              |           |                   |     |         |              |
|-----------------------------------------------------------------------------------|-----------------------------------------------------------------------------------------------------------------------------------------------------------------------------------------------------------------------------------------------------------------------------------------------------------------------------------------------------------------------------------------------------------------------------------|-----------------------|-------------------------|--------------|------|------------|------|-----------|---------------------------------------------------------|--------------|-----------|-------------------|-----|---------|--------------|
| 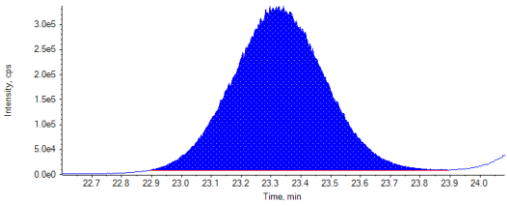 | <table> <tr> <td><b>Compound Name:</b></td><td>F2 (342.000/159.100 Da)</td></tr> <tr> <td>Expected RT:</td><td>23.3</td></tr> <tr> <td>Actual RT:</td><td>23.3</td></tr> <tr> <td>Equation:</td><td>At least 2 points are required to calculate regression.</td></tr> <tr> <td>Area Counts:</td><td>7.32e+006</td></tr> <tr> <td>ISTD Area Counts:</td><td>N/A</td></tr> <tr> <td>Amount:</td><td>0.00 (ng/mL)</td></tr> </table> | <b>Compound Name:</b> | F2 (342.000/159.100 Da) | Expected RT: | 23.3 | Actual RT: | 23.3 | Equation: | At least 2 points are required to calculate regression. | Area Counts: | 7.32e+006 | ISTD Area Counts: | N/A | Amount: | 0.00 (ng/mL) |
| <b>Compound Name:</b>                                                             | F2 (342.000/159.100 Da)                                                                                                                                                                                                                                                                                                                                                                                                           |                       |                         |              |      |            |      |           |                                                         |              |           |                   |     |         |              |
| Expected RT:                                                                      | 23.3                                                                                                                                                                                                                                                                                                                                                                                                                              |                       |                         |              |      |            |      |           |                                                         |              |           |                   |     |         |              |
| Actual RT:                                                                        | 23.3                                                                                                                                                                                                                                                                                                                                                                                                                              |                       |                         |              |      |            |      |           |                                                         |              |           |                   |     |         |              |
| Equation:                                                                         | At least 2 points are required to calculate regression.                                                                                                                                                                                                                                                                                                                                                                           |                       |                         |              |      |            |      |           |                                                         |              |           |                   |     |         |              |
| Area Counts:                                                                      | 7.32e+006                                                                                                                                                                                                                                                                                                                                                                                                                         |                       |                         |              |      |            |      |           |                                                         |              |           |                   |     |         |              |
| ISTD Area Counts:                                                                 | N/A                                                                                                                                                                                                                                                                                                                                                                                                                               |                       |                         |              |      |            |      |           |                                                         |              |           |                   |     |         |              |
| Amount:                                                                           | 0.00 (ng/mL)                                                                                                                                                                                                                                                                                                                                                                                                                      |                       |                         |              |      |            |      |           |                                                         |              |           |                   |     |         |              |
|  | <table> <tr> <td><b>Compound Name:</b></td><td>F3 (342.000/159.100 Da)</td></tr> <tr> <td>Expected RT:</td><td>24.4</td></tr> <tr> <td>Actual RT:</td><td>24.4</td></tr> <tr> <td>Equation:</td><td>At least 2 points are required to calculate regression.</td></tr> <tr> <td>Area Counts:</td><td>4.75e+006</td></tr> <tr> <td>ISTD Area Counts:</td><td>N/A</td></tr> <tr> <td>Amount:</td><td>0.00 (ng/mL)</td></tr> </table> | <b>Compound Name:</b> | F3 (342.000/159.100 Da) | Expected RT: | 24.4 | Actual RT: | 24.4 | Equation: | At least 2 points are required to calculate regression. | Area Counts: | 4.75e+006 | ISTD Area Counts: | N/A | Amount: | 0.00 (ng/mL) |
| <b>Compound Name:</b>                                                             | F3 (342.000/159.100 Da)                                                                                                                                                                                                                                                                                                                                                                                                           |                       |                         |              |      |            |      |           |                                                         |              |           |                   |     |         |              |
| Expected RT:                                                                      | 24.4                                                                                                                                                                                                                                                                                                                                                                                                                              |                       |                         |              |      |            |      |           |                                                         |              |           |                   |     |         |              |
| Actual RT:                                                                        | 24.4                                                                                                                                                                                                                                                                                                                                                                                                                              |                       |                         |              |      |            |      |           |                                                         |              |           |                   |     |         |              |
| Equation:                                                                         | At least 2 points are required to calculate regression.                                                                                                                                                                                                                                                                                                                                                                           |                       |                         |              |      |            |      |           |                                                         |              |           |                   |     |         |              |
| Area Counts:                                                                      | 4.75e+006                                                                                                                                                                                                                                                                                                                                                                                                                         |                       |                         |              |      |            |      |           |                                                         |              |           |                   |     |         |              |
| ISTD Area Counts:                                                                 | N/A                                                                                                                                                                                                                                                                                                                                                                                                                               |                       |                         |              |      |            |      |           |                                                         |              |           |                   |     |         |              |
| Amount:                                                                           | 0.00 (ng/mL)                                                                                                                                                                                                                                                                                                                                                                                                                      |                       |                         |              |      |            |      |           |                                                         |              |           |                   |     |         |              |
|  | <table> <tr> <td><b>Compound Name:</b></td><td>F4 (342.000/159.100 Da)</td></tr> <tr> <td>Expected RT:</td><td>25.9</td></tr> <tr> <td>Actual RT:</td><td>25.9</td></tr> <tr> <td>Equation:</td><td>At least 2 points are required to calculate regression.</td></tr> <tr> <td>Area Counts:</td><td>7.30e+006</td></tr> <tr> <td>ISTD Area Counts:</td><td>N/A</td></tr> <tr> <td>Amount:</td><td>0.00 (ng/mL)</td></tr> </table> | <b>Compound Name:</b> | F4 (342.000/159.100 Da) | Expected RT: | 25.9 | Actual RT: | 25.9 | Equation: | At least 2 points are required to calculate regression. | Area Counts: | 7.30e+006 | ISTD Area Counts: | N/A | Amount: | 0.00 (ng/mL) |
| <b>Compound Name:</b>                                                             | F4 (342.000/159.100 Da)                                                                                                                                                                                                                                                                                                                                                                                                           |                       |                         |              |      |            |      |           |                                                         |              |           |                   |     |         |              |
| Expected RT:                                                                      | 25.9                                                                                                                                                                                                                                                                                                                                                                                                                              |                       |                         |              |      |            |      |           |                                                         |              |           |                   |     |         |              |
| Actual RT:                                                                        | 25.9                                                                                                                                                                                                                                                                                                                                                                                                                              |                       |                         |              |      |            |      |           |                                                         |              |           |                   |     |         |              |
| Equation:                                                                         | At least 2 points are required to calculate regression.                                                                                                                                                                                                                                                                                                                                                                           |                       |                         |              |      |            |      |           |                                                         |              |           |                   |     |         |              |
| Area Counts:                                                                      | 7.30e+006                                                                                                                                                                                                                                                                                                                                                                                                                         |                       |                         |              |      |            |      |           |                                                         |              |           |                   |     |         |              |
| ISTD Area Counts:                                                                 | N/A                                                                                                                                                                                                                                                                                                                                                                                                                               |                       |                         |              |      |            |      |           |                                                         |              |           |                   |     |         |              |
| Amount:                                                                           | 0.00 (ng/mL)                                                                                                                                                                                                                                                                                                                                                                                                                      |                       |                         |              |      |            |      |           |                                                         |              |           |                   |     |         |              |

Figure S28 The LC chromatogram of plums treated with 0.020 a.i. g/L propiconazole at 20 d (4°C)



Figure Caption  
Figure\_29\_SuppInfo.

|                           |                          |                          |                                      |
|---------------------------|--------------------------|--------------------------|--------------------------------------|
| <b>Data File</b>          | 20220822 BHZ-YP-4du.wiff | <b>Result Table</b>      | 4-0.02-25d-2.rdb                     |
| <b>Acquisition Date</b>   | 8/22/2022 9:27:31 AM     | <b>Algorithm Used</b>    | MQL                                  |
| <b>Acquisition Method</b> | BHZ method.dam           | <b>Instrument Name</b>   | AB SCIEX Triple Quad 4500            |
| <b>Project</b>            | DPY                      | <b>Processing Method</b> | <i>No data for Processing Method</i> |

Sample Name: 0.02-25d-2 Vial #: 92

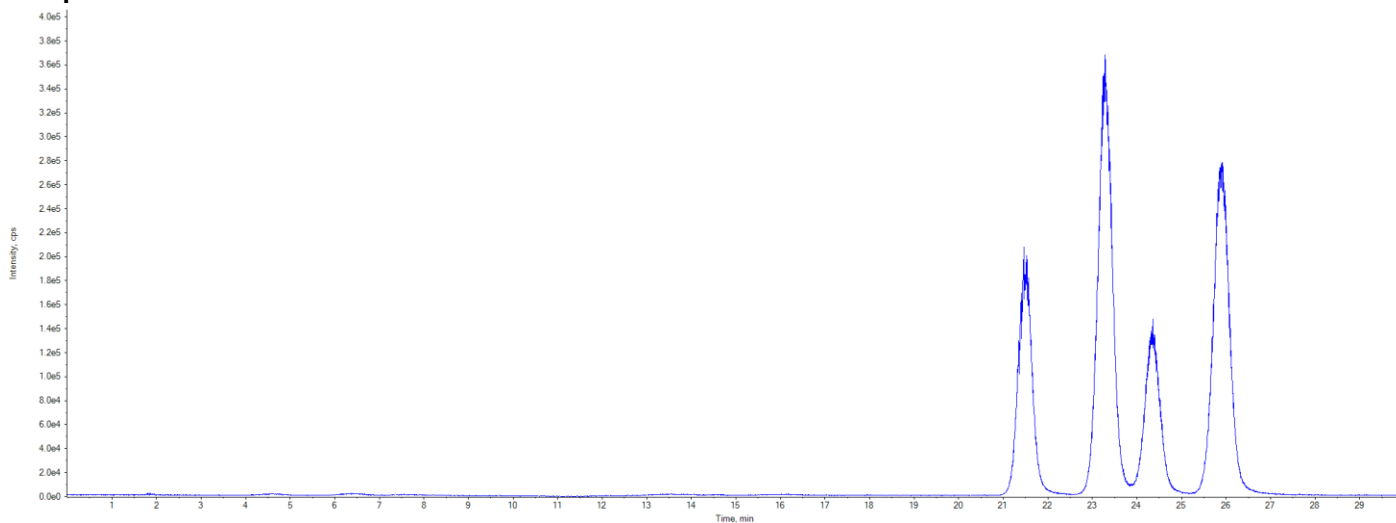

|                           |                                   |                         |                  |
|---------------------------|-----------------------------------|-------------------------|------------------|
| <b>Sample Name</b>        | 0.02-25d-2                        | <b>Injection Vial</b>   | 92               |
| <b>Data File</b>          | 20220822 BHZ-YP-4du.wiff          | <b>Injection Volume</b> | 10               |
| <b>Acquisition Date</b>   | 8/22/2022 9:27:31 AM              | <b>Algorithm Used</b>   | MQL              |
| <b>Acquisition Method</b> | BHZ method.dam                    | <b>Sample Type</b>      | Unknown          |
| <b>Instrument Name</b>    | AB SCIEX Triple Quad 4500         | <b>Result Table</b>     | 4-0.02-25d-2.rdb |
| <b>Sample ID</b>          | <i>No data for Sample ID</i>      | <b>Dilution Factor</b>  | 1.00             |
| <b>Sample Comment</b>     | <i>No data for Sample Comment</i> | <b>Weight to Volume</b> | 0.00             |

Approved By (Date and Initials): \_\_\_\_\_.

|  |                       |                                                         |
|--|-----------------------|---------------------------------------------------------|
|  | <b>Compound Name:</b> | F1 (342.000/159.100 Da)                                 |
|  | Expected RT:          | 21.5                                                    |
|  | Actual RT:            | 21.5                                                    |
|  | Equation:             | At least 2 points are required to calculate regression. |
|  | Area Counts:          | 3.44e+006                                               |
|  | ISTD Area Counts:     | N/A                                                     |
|  | Amount:               | 0.00 (ng/mL)                                            |

|                                                                                  |                       |                                                         |
|----------------------------------------------------------------------------------|-----------------------|---------------------------------------------------------|
| 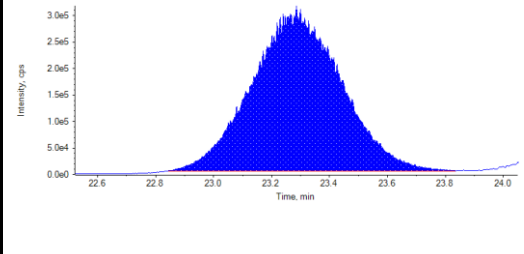 | <b>Compound Name:</b> | F2 (342.000/159.100 Da)                                 |
|                                                                                  | Expected RT:          | 23.3                                                    |
|                                                                                  | Actual RT:            | 23.3                                                    |
|                                                                                  | Equation:             | At least 2 points are required to calculate regression. |
|                                                                                  | Area Counts:          | 6.55e+006                                               |
|                                                                                  | ISTD Area Counts:     | N/A                                                     |
|  | <b>Compound Name:</b> | F3 (342.000/159.100 Da)                                 |
|                                                                                  | Expected RT:          | 24.4                                                    |
|                                                                                  | Actual RT:            | 24.4                                                    |
|                                                                                  | Equation:             | At least 2 points are required to calculate regression. |
|                                                                                  | Area Counts:          | 2.44e+006                                               |
|                                                                                  | ISTD Area Counts:     | N/A                                                     |
|  | <b>Compound Name:</b> | F4 (342.000/159.100 Da)                                 |
|                                                                                  | Expected RT:          | 25.9                                                    |
|                                                                                  | Actual RT:            | 25.9                                                    |
|                                                                                  | Equation:             | At least 2 points are required to calculate regression. |
|                                                                                  | Area Counts:          | 5.89e+006                                               |
|                                                                                  | ISTD Area Counts:     | N/A                                                     |
|                                                                                  | Amount:               | 0.00 (ng/mL)                                            |
|                                                                                  |                       |                                                         |
|                                                                                  |                       |                                                         |
|                                                                                  |                       |                                                         |
|                                                                                  |                       |                                                         |
|                                                                                  |                       |                                                         |

Figure S29 The LC chromatogram of plums treated with 0.020 a.i. g/L propiconazole at 25 d (4°C)



Figure Caption  
 Figure\_30\_SuppInfo.

|                           |                          |                          |                                      |
|---------------------------|--------------------------|--------------------------|--------------------------------------|
| <b>Data File</b>          | 20220822 BHZ-YP-4du.wiff | <b>Result Table</b>      | 4-0.02-35d-2.rdb                     |
| <b>Acquisition Date</b>   | 8/22/2022 6:18:45 AM     | <b>Algorithm Used</b>    | MQL                                  |
| <b>Acquisition Method</b> | BHZ method.dam           | <b>Instrument Name</b>   | AB SCIEX Triple Quad 4500            |
| <b>Project</b>            | DPY                      | <b>Processing Method</b> | <i>No data for Processing Method</i> |

Sample Name:

0.02-35d-2

Vial #:

86

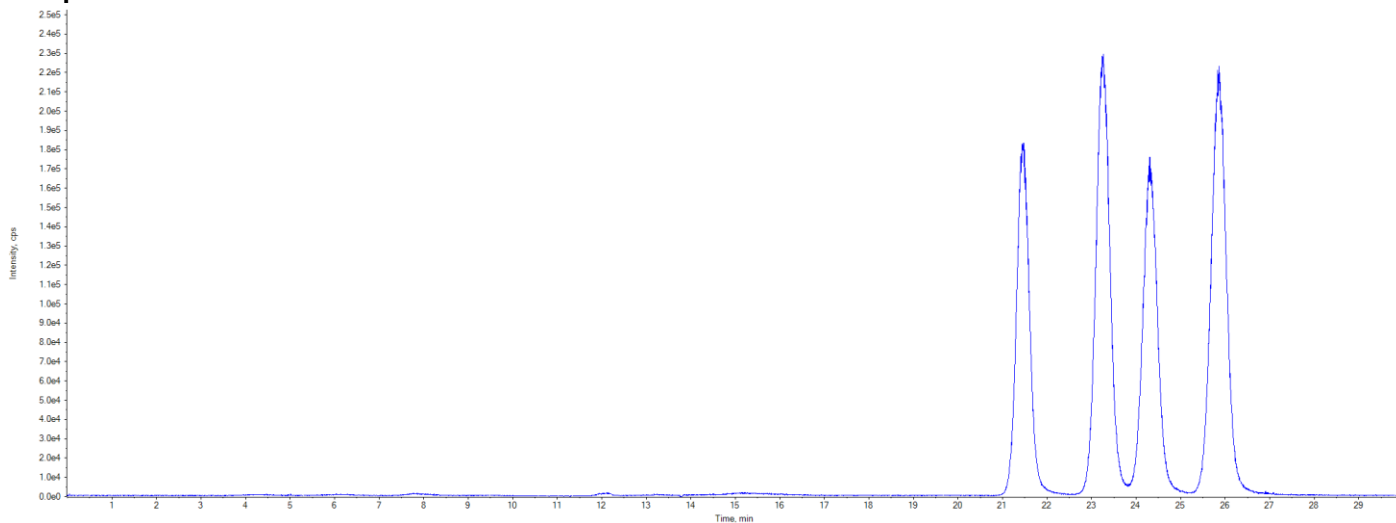

|                           |                                   |                         |                  |
|---------------------------|-----------------------------------|-------------------------|------------------|
| <b>Sample Name</b>        | 0.02-35d-2                        | <b>Injection Vial</b>   | 86               |
| <b>Data File</b>          | 20220822 BHZ-YP-4du.wiff          | <b>Injection Volume</b> | 10               |
| <b>Acquisition Date</b>   | 8/22/2022 6:18:45 AM              | <b>Algorithm Used</b>   | MQL              |
| <b>Acquisition Method</b> | BHZ method.dam                    | <b>Sample Type</b>      | Unknown          |
| <b>Instrument Name</b>    | AB SCIEX Triple Quad 4500         | <b>Result Table</b>     | 4-0.02-35d-2.rdb |
| <b>Sample ID</b>          | <i>No data for Sample ID</i>      | <b>Dilution Factor</b>  | 1.00             |
| <b>Sample Comment</b>     | <i>No data for Sample Comment</i> | <b>Weight to Volume</b> | 0.00             |

Approved By (Date and Initials): \_\_\_\_\_.

|                                                                                                                                                                                                    |                       |                                                         |
|----------------------------------------------------------------------------------------------------------------------------------------------------------------------------------------------------|-----------------------|---------------------------------------------------------|
| <p>The mass spectrum plot shows intensity (cps) on the y-axis (0.0e0 to 1.4e5) against time (min) on the x-axis (20.9 to 22.1). A single broad peak is centered at approximately 21.5 minutes.</p> | <b>Compound Name:</b> | F1 (342.000/159.100 Da)                                 |
|                                                                                                                                                                                                    | Expected RT:          | 21.5                                                    |
|                                                                                                                                                                                                    | Actual RT:            | 21.5                                                    |
|                                                                                                                                                                                                    | Equation:             | At least 2 points are required to calculate regression. |
|                                                                                                                                                                                                    | Area Counts:          | 3.11e+006                                               |
|                                                                                                                                                                                                    | ISTD Area Counts:     | N/A                                                     |
|                                                                                                                                                                                                    | Amount:               | 0.00 (ng/mL)                                            |

|                                                                                   |                       |                                                         |
|-----------------------------------------------------------------------------------|-----------------------|---------------------------------------------------------|
| 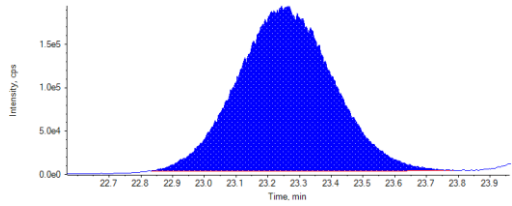 | <b>Compound Name:</b> | F2 (342.000/159.100 Da)                                 |
|                                                                                   | Expected RT:          | 23.3                                                    |
|                                                                                   | Actual RT:            | 23.3                                                    |
|                                                                                   | Equation:             | At least 2 points are required to calculate regression. |
|                                                                                   | Area Counts:          | 4.11e+006                                               |
|                                                                                   | ISTD Area Counts:     | N/A                                                     |
|  | <b>Compound Name:</b> | F3 (342.000/159.100 Da)                                 |
|                                                                                   | Expected RT:          | 24.3                                                    |
|                                                                                   | Actual RT:            | 24.3                                                    |
|                                                                                   | Equation:             | At least 2 points are required to calculate regression. |
|                                                                                   | Area Counts:          | 3.06e+006                                               |
|                                                                                   | ISTD Area Counts:     | N/A                                                     |
|  | <b>Compound Name:</b> | F4 (342.000/159.100 Da)                                 |
|                                                                                   | Expected RT:          | 25.9                                                    |
|                                                                                   | Actual RT:            | 25.9                                                    |
|                                                                                   | Equation:             | At least 2 points are required to calculate regression. |
|                                                                                   | Area Counts:          | 4.23e+006                                               |
|                                                                                   | ISTD Area Counts:     | N/A                                                     |
| Amount:                                                                           |                       | 0.00 (ng/mL)                                            |

Figure S30 The LC chromatogram of plums treated with 0.020 a.i. g/L propiconazole at 35 d (4°C)



Figure Caption  
 Figure\_31\_SuppInfo.

|                           |                      |                          |                                      |
|---------------------------|----------------------|--------------------------|--------------------------------------|
| <b>Data File</b>          | BHZ 20220911.wiff    | <b>Result Table</b>      | 4-0.02-45d-3.rdb                     |
| <b>Acquisition Date</b>   | 9/11/2022 5:09:17 PM | <b>Algorithm Used</b>    | MQL                                  |
| <b>Acquisition Method</b> | BHZ method.dam       | <b>Instrument Name</b>   | AB SCIEX Triple Quad 4500            |
| <b>Project</b>            | DPY                  | <b>Processing Method</b> | <i>No data for Processing Method</i> |

Sample Name: 4-0.02-45d-3 Vial #: 17

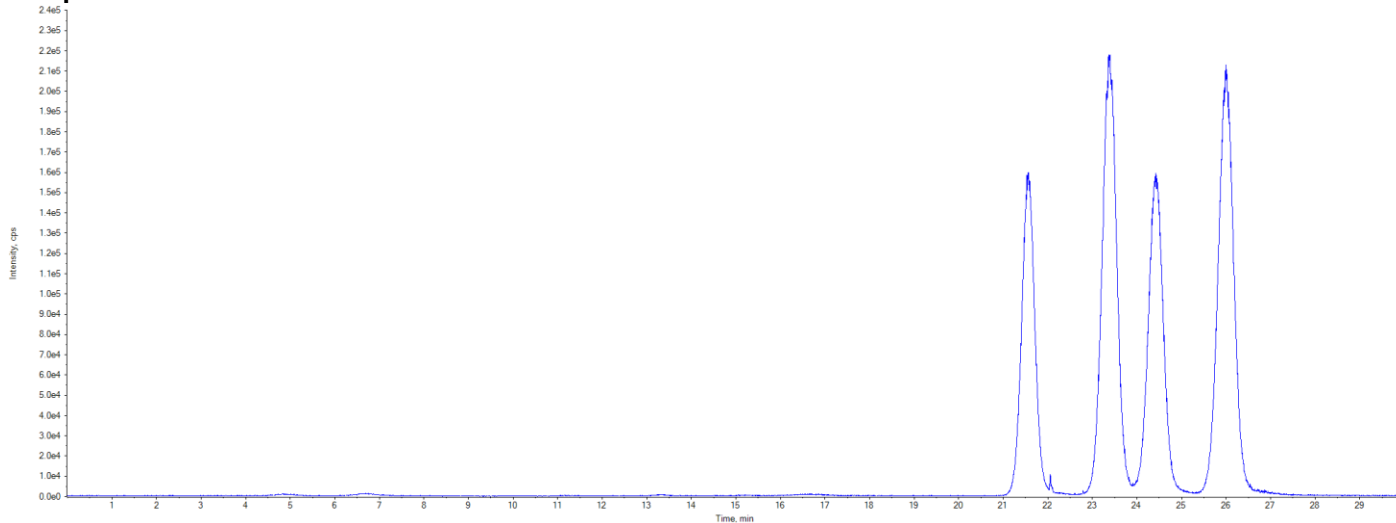

|                           |                                   |                         |                  |
|---------------------------|-----------------------------------|-------------------------|------------------|
| <b>Sample Name</b>        | 4-0.02-45d-3                      | <b>Injection Vial</b>   | 17               |
| <b>Data File</b>          | BHZ 20220911.wiff                 | <b>Injection Volume</b> | 10               |
| <b>Acquisition Date</b>   | 9/11/2022 5:09:17 PM              | <b>Algorithm Used</b>   | MQL              |
| <b>Acquisition Method</b> | BHZ method.dam                    | <b>Sample Type</b>      | Unknown          |
| <b>Instrument Name</b>    | AB SCIEX Triple Quad 4500         | <b>Result Table</b>     | 4-0.02-45d-3.rdb |
| <b>Sample ID</b>          | <i>No data for Sample ID</i>      | <b>Dilution Factor</b>  | 1.00             |
| <b>Sample Comment</b>     | <i>No data for Sample Comment</i> | <b>Weight to Volume</b> | 0.00             |

Approved By (Date and Initials): \_\_\_\_\_.

|                                                                                                                                                                       |                       |                                                         |
|-----------------------------------------------------------------------------------------------------------------------------------------------------------------------|-----------------------|---------------------------------------------------------|
| <p>The zoomed-in peak shows intensity (cps) on the y-axis (0.0e0 to 1.2e5) against time (min) on the x-axis (20.9 to 22.2). The peak is centered at 21.6 minutes.</p> | <b>Compound Name:</b> | F1 (342.000/159.100 Da)                                 |
|                                                                                                                                                                       | Expected RT:          | 21.6                                                    |
|                                                                                                                                                                       | Actual RT:            | 21.6                                                    |
|                                                                                                                                                                       | Equation:             | At least 2 points are required to calculate regression. |
|                                                                                                                                                                       | Area Counts:          | 2.71e+006                                               |
|                                                                                                                                                                       | ISTD Area Counts:     | N/A                                                     |
|                                                                                                                                                                       | Amount:               | 0.00 (ng/mL)                                            |

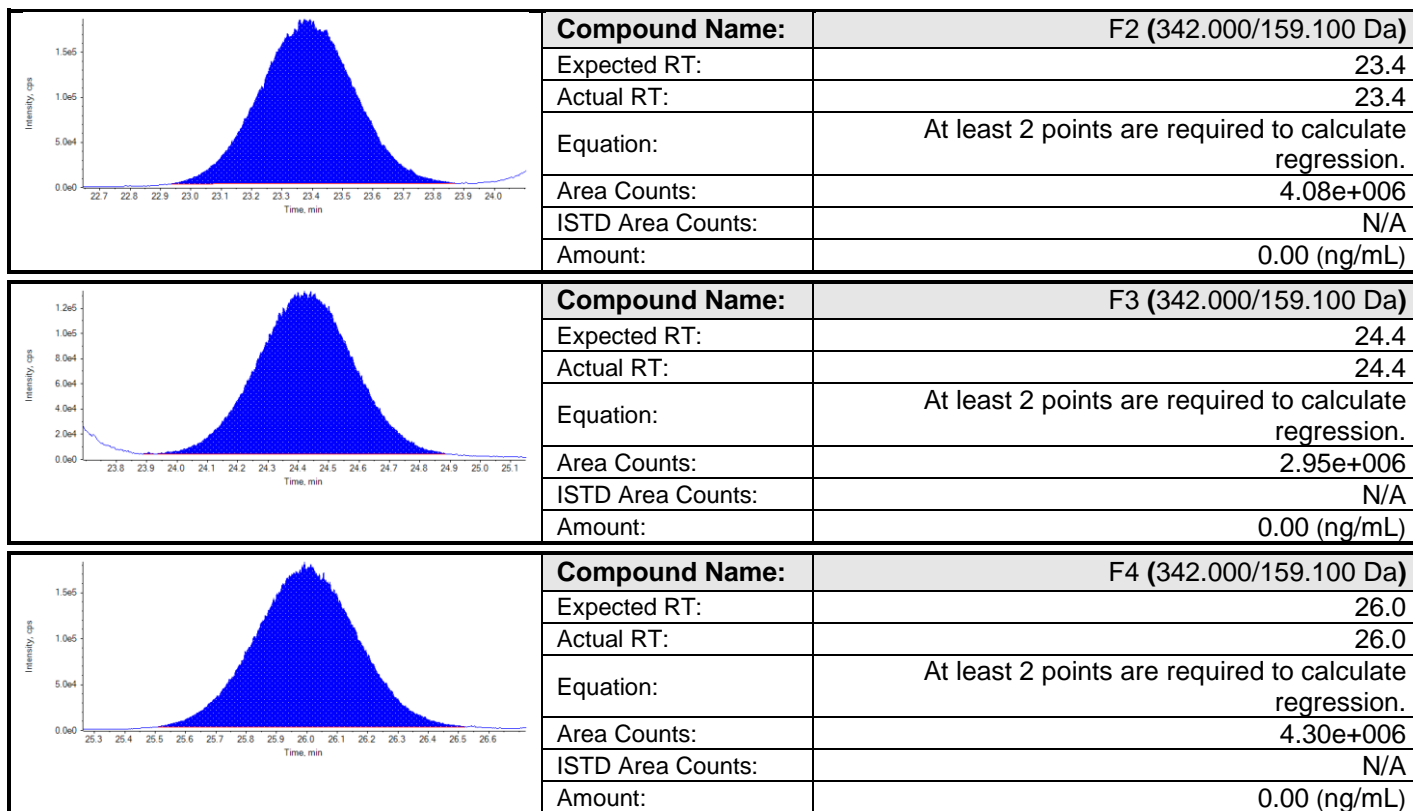

Figure S31 The LC chromatogram of plums treated with 0.020 a.i. g/L propiconazole at 45 d (4°C)



Figure Caption  
 Figure\_32\_SuppInfo.

|                           |                      |                          |                                      |
|---------------------------|----------------------|--------------------------|--------------------------------------|
| <b>Data File</b>          | BHZ 20220911.wiff    | <b>Result Table</b>      | 4-0.02-55d-3.rdb                     |
| <b>Acquisition Date</b>   | 9/11/2022 3:34:54 PM | <b>Algorithm Used</b>    | MQL                                  |
| <b>Acquisition Method</b> | BHZ method.dam       | <b>Instrument Name</b>   | AB SCIEX Triple Quad 4500            |
| <b>Project</b>            | DPY                  | <b>Processing Method</b> | <i>No data for Processing Method</i> |

**Sample Name:** 4-0.02-55d-3 **Vial #:** 14

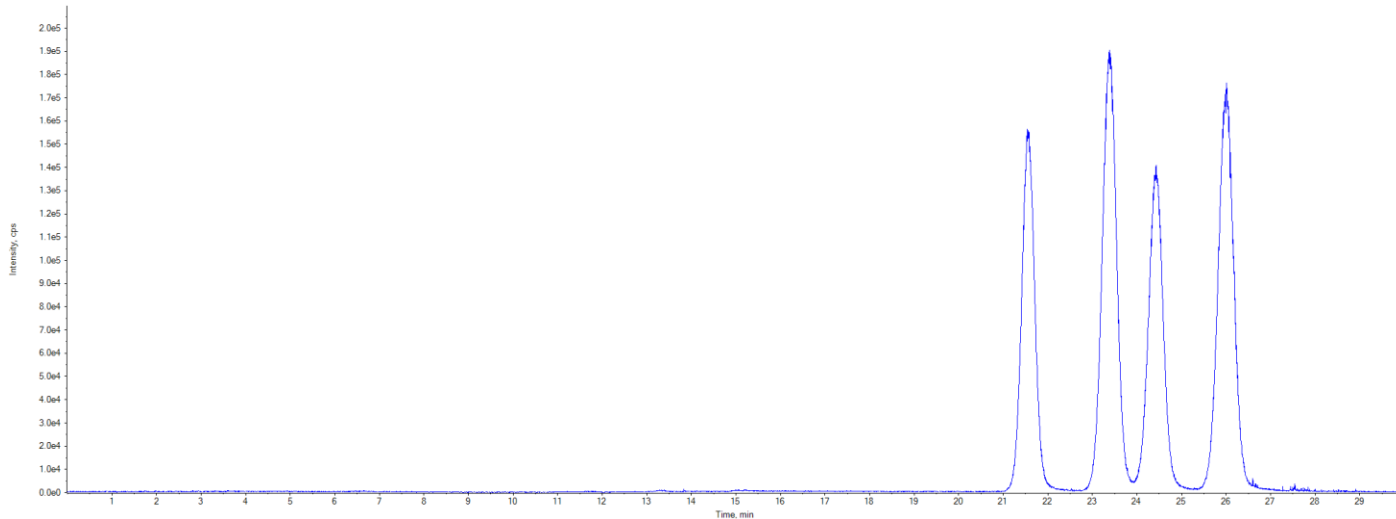

|                           |                                   |                         |                  |
|---------------------------|-----------------------------------|-------------------------|------------------|
| <b>Sample Name</b>        | 4-0.02-55d-3                      | <b>Injection Vial</b>   | 14               |
| <b>Data File</b>          | BHZ 20220911.wiff                 | <b>Injection Volume</b> | 10               |
| <b>Acquisition Date</b>   | 9/11/2022 3:34:54 PM              | <b>Algorithm Used</b>   | MQL              |
| <b>Acquisition Method</b> | BHZ method.dam                    | <b>Sample Type</b>      | Unknown          |
| <b>Instrument Name</b>    | AB SCIEX Triple Quad 4500         | <b>Result Table</b>     | 4-0.02-55d-3.rdb |
| <b>Sample ID</b>          | <i>No data for Sample ID</i>      | <b>Dilution Factor</b>  | 1.00             |
| <b>Sample Comment</b>     | <i>No data for Sample Comment</i> | <b>Weight to Volume</b> | 0.00             |

Approved By (Date and Initials): \_\_\_\_\_.

|                                                                                                                                                                                                                                                                                              |                       |                                                         |
|----------------------------------------------------------------------------------------------------------------------------------------------------------------------------------------------------------------------------------------------------------------------------------------------|-----------------------|---------------------------------------------------------|
| <p>The zoomed-in chromatogram shows a single, well-resolved peak at 21.5 minutes. The y-axis (Intensity, cps) ranges from 0.0e0 to 1.2e5, and the x-axis (Time, min) ranges from 20.9 to 22.2. The peak is centered at 21.5 minutes with a maximum intensity of approximately 1.1e5 cps.</p> | <b>Compound Name:</b> | F1 (342.000/159.100 Da)                                 |
|                                                                                                                                                                                                                                                                                              | Expected RT:          | 21.5                                                    |
|                                                                                                                                                                                                                                                                                              | Actual RT:            | 21.5                                                    |
|                                                                                                                                                                                                                                                                                              | Equation:             | At least 2 points are required to calculate regression. |
|                                                                                                                                                                                                                                                                                              | Area Counts:          | 2.64e+006                                               |
|                                                                                                                                                                                                                                                                                              | ISTD Area Counts:     | N/A                                                     |
|                                                                                                                                                                                                                                                                                              | Amount:               | 0.00 (ng/mL)                                            |



|                                                                                  |                       |                                                         |
|----------------------------------------------------------------------------------|-----------------------|---------------------------------------------------------|
| 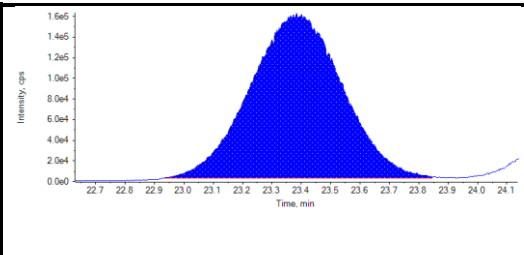 | <b>Compound Name:</b> | F2 (342.000/159.100 Da)                                 |
|                                                                                  | Expected RT:          | 23.4                                                    |
|                                                                                  | Actual RT:            | 23.4                                                    |
|                                                                                  | Equation:             | At least 2 points are required to calculate regression. |
|                                                                                  | Area Counts:          | 3.54e+006                                               |
|                                                                                  | ISTD Area Counts:     | N/A                                                     |
|  | <b>Compound Name:</b> | F3 (342.000/159.100 Da)                                 |
|                                                                                  | Expected RT:          | 24.4                                                    |
|                                                                                  | Actual RT:            | 24.4                                                    |
|                                                                                  | Equation:             | At least 2 points are required to calculate regression. |
|                                                                                  | Area Counts:          | 2.56e+006                                               |
|                                                                                  | ISTD Area Counts:     | N/A                                                     |
|  | <b>Compound Name:</b> | F4 (342.000/159.100 Da)                                 |
|                                                                                  | Expected RT:          | 26.0                                                    |
|                                                                                  | Actual RT:            | 26.0                                                    |
|                                                                                  | Equation:             | At least 2 points are required to calculate regression. |
|                                                                                  | Area Counts:          | 3.53e+006                                               |
|                                                                                  | ISTD Area Counts:     | N/A                                                     |
|                                                                                  | Amount:               | 0.00 (ng/mL)                                            |
|                                                                                  |                       |                                                         |
|                                                                                  |                       |                                                         |
|                                                                                  |                       |                                                         |
|                                                                                  |                       |                                                         |
|                                                                                  |                       |                                                         |

Figure S32 The LC chromatogram of plums treated with 0.020 a.i. g/L propiconazole at 55 d (4°C)



Figure Caption  
Figure\_33\_SuppInfo.

|                           |                      |                          |                                      |
|---------------------------|----------------------|--------------------------|--------------------------------------|
| <b>Data File</b>          | BHZ 20220911.wiff    | <b>Result Table</b>      | QX-0.004-55d-2.rdb                   |
| <b>Acquisition Date</b>   | 9/12/2022 7:50:26 AM | <b>Algorithm Used</b>    | MQL                                  |
| <b>Acquisition Method</b> | BHZ method.dam       | <b>Instrument Name</b>   | AB SCIEX Triple Quad 4500            |
| <b>Project</b>            | DPY                  | <b>Processing Method</b> | <i>No data for Processing Method</i> |

Sample Name: 4-0.004-55d-QX-2 Vial #: 43

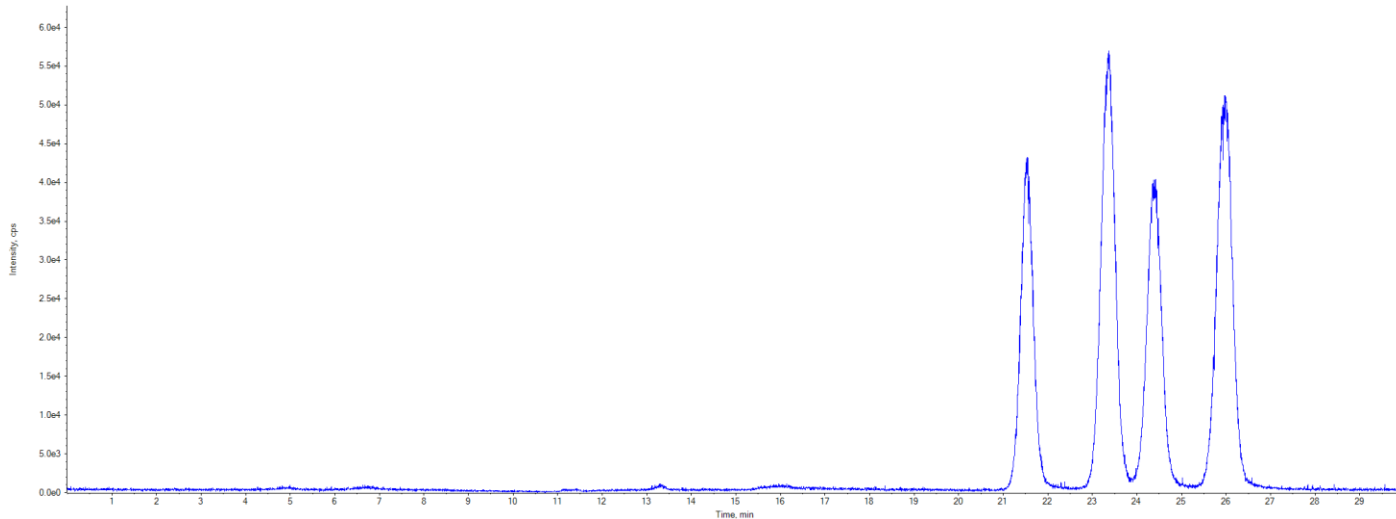

|                           |                                   |                         |                    |
|---------------------------|-----------------------------------|-------------------------|--------------------|
| <b>Sample Name</b>        | 4-0.004-55d-QX-2                  | <b>Injection Vial</b>   | 43                 |
| <b>Data File</b>          | BHZ 20220911.wiff                 | <b>Injection Volume</b> | 10                 |
| <b>Acquisition Date</b>   | 9/12/2022 7:50:26 AM              | <b>Algorithm Used</b>   | MQL                |
| <b>Acquisition Method</b> | BHZ method.dam                    | <b>Sample Type</b>      | Unknown            |
| <b>Instrument Name</b>    | AB SCIEX Triple Quad 4500         | <b>Result Table</b>     | QX-0.004-55d-2.rdb |
| <b>Sample ID</b>          | <i>No data for Sample ID</i>      | <b>Dilution Factor</b>  | 1.00               |
| <b>Sample Comment</b>     | <i>No data for Sample Comment</i> | <b>Weight to Volume</b> | 0.00               |

Approved By (Date and Initials): \_\_\_\_\_.

|                                                                                                                                                                                                                                                                                                                |                       |                                                         |
|----------------------------------------------------------------------------------------------------------------------------------------------------------------------------------------------------------------------------------------------------------------------------------------------------------------|-----------------------|---------------------------------------------------------|
| <p>The zoomed-in chromatogram shows a single, well-resolved peak at a retention time of 21.5 minutes. The y-axis represents intensity in cps (0.0e0 to 3.5e4), and the x-axis represents time in minutes (20.9 to 22.2). The peak is symmetric and reaches a maximum intensity of approximately 3.0e4 cps.</p> | <b>Compound Name:</b> | F1 (342.000/159.100 Da)                                 |
|                                                                                                                                                                                                                                                                                                                | Expected RT:          | 21.5                                                    |
|                                                                                                                                                                                                                                                                                                                | Actual RT:            | 21.5                                                    |
|                                                                                                                                                                                                                                                                                                                | Equation:             | At least 2 points are required to calculate regression. |
|                                                                                                                                                                                                                                                                                                                | Area Counts:          | 7.07e+005                                               |
|                                                                                                                                                                                                                                                                                                                | ISTD Area Counts:     | N/A                                                     |
|                                                                                                                                                                                                                                                                                                                | Amount:               | 0.00 (ng/mL)                                            |

|                                                                                   |                       |                                                         |
|-----------------------------------------------------------------------------------|-----------------------|---------------------------------------------------------|
| 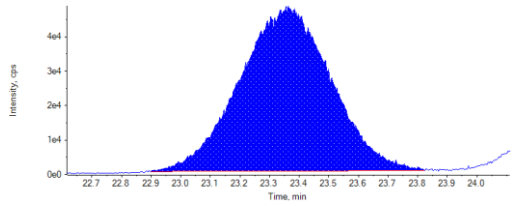 | <b>Compound Name:</b> | F2 (342.000/159.100 Da)                                 |
|                                                                                   | Expected RT:          | 23.4                                                    |
|                                                                                   | Actual RT:            | 23.4                                                    |
|                                                                                   | Equation:             | At least 2 points are required to calculate regression. |
|                                                                                   | Area Counts:          | 1.04e+006                                               |
|                                                                                   | ISTD Area Counts:     | N/A                                                     |
|  | <b>Compound Name:</b> | F3 (342.000/159.100 Da)                                 |
|                                                                                   | Expected RT:          | 24.3                                                    |
|                                                                                   | Actual RT:            | 24.3                                                    |
|                                                                                   | Equation:             | At least 2 points are required to calculate regression. |
|                                                                                   | Area Counts:          | 7.41e+005                                               |
|                                                                                   | ISTD Area Counts:     | N/A                                                     |
|  | <b>Compound Name:</b> | F4 (342.000/159.100 Da)                                 |
|                                                                                   | Expected RT:          | 26.0                                                    |
|                                                                                   | Actual RT:            | 26.0                                                    |
|                                                                                   | Equation:             | At least 2 points are required to calculate regression. |
|                                                                                   | Area Counts:          | 1.05e+006                                               |
|                                                                                   | ISTD Area Counts:     | N/A                                                     |
|                                                                                   | Amount:               | 0.00 (ng/mL)                                            |
|                                                                                   |                       |                                                         |
|                                                                                   |                       |                                                         |
|                                                                                   |                       |                                                         |
|                                                                                   |                       |                                                         |
|                                                                                   |                       |                                                         |

Figure S33 The LC chromatogram of plums treated with 0.04 a.i. g/L propiconazole were cleaned



Figure Caption  
Figure\_34\_SuppInfo.

|                           |                      |                          |                                      |
|---------------------------|----------------------|--------------------------|--------------------------------------|
| <b>Data File</b>          | BHZ 20220911.wiff    | <b>Result Table</b>      | QX-0.02-55d-2.rdb                    |
| <b>Acquisition Date</b>   | 9/12/2022 6:16:00 AM | <b>Algorithm Used</b>    | MQL                                  |
| <b>Acquisition Method</b> | BHZ method.dam       | <b>Instrument Name</b>   | AB SCIEX Triple Quad 4500            |
| <b>Project</b>            | DPY                  | <b>Processing Method</b> | <i>No data for Processing Method</i> |

Sample Name: 4-0.02-55d-QX-2 Vial #: 40

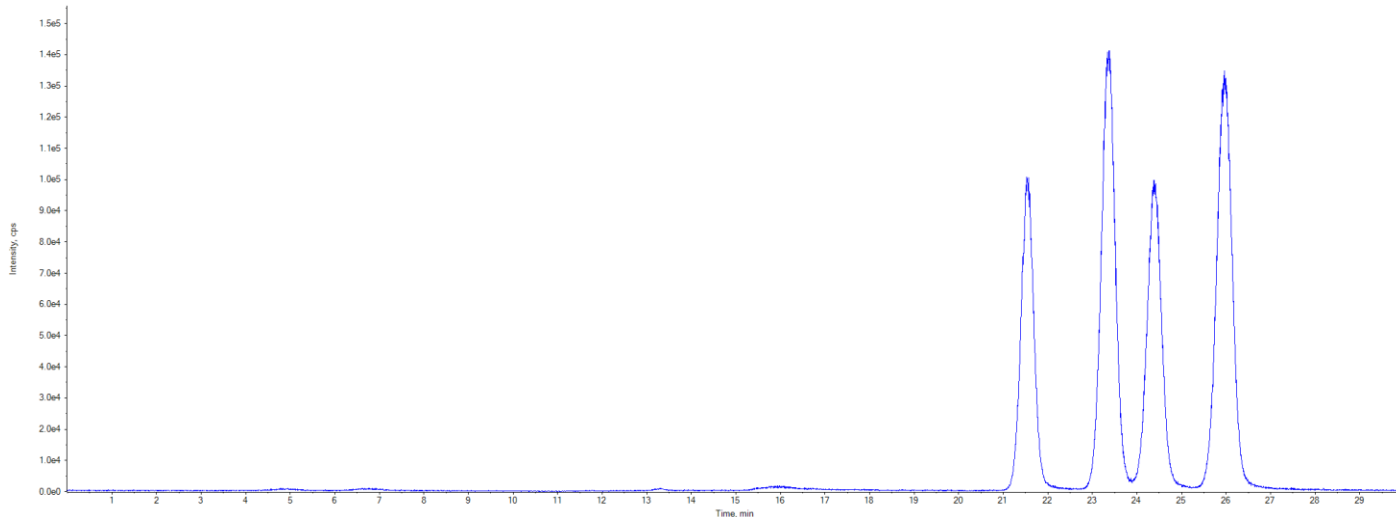

|                           |                                   |                         |                   |
|---------------------------|-----------------------------------|-------------------------|-------------------|
| <b>Sample Name</b>        | 4-0.02-55d-QX-2                   | <b>Injection Vial</b>   | 40                |
| <b>Data File</b>          | BHZ 20220911.wiff                 | <b>Injection Volume</b> | 10                |
| <b>Acquisition Date</b>   | 9/12/2022 6:16:00 AM              | <b>Algorithm Used</b>   | MQL               |
| <b>Acquisition Method</b> | BHZ method.dam                    | <b>Sample Type</b>      | Unknown           |
| <b>Instrument Name</b>    | AB SCIEX Triple Quad 4500         | <b>Result Table</b>     | QX-0.02-55d-2.rdb |
| <b>Sample ID</b>          | <i>No data for Sample ID</i>      | <b>Dilution Factor</b>  | 1.00              |
| <b>Sample Comment</b>     | <i>No data for Sample Comment</i> | <b>Weight to Volume</b> | 0.00              |

Approved By (Date and Initials): \_\_\_\_\_.

|  |                       |                                                         |
|--|-----------------------|---------------------------------------------------------|
|  | <b>Compound Name:</b> | F1 (342.000/159.100 Da)                                 |
|  | Expected RT:          | 21.5                                                    |
|  | Actual RT:            | 21.5                                                    |
|  | Equation:             | At least 2 points are required to calculate regression. |
|  | Area Counts:          | 1.67e+006                                               |
|  | ISTD Area Counts:     | N/A                                                     |
|  | Amount:               | 0.00 (ng/mL)                                            |

|                                                                                   |                                                                                                                                                                                                                                                                                                                                                                                                                                   |                       |                         |              |      |            |      |           |                                                         |              |           |                   |     |         |              |
|-----------------------------------------------------------------------------------|-----------------------------------------------------------------------------------------------------------------------------------------------------------------------------------------------------------------------------------------------------------------------------------------------------------------------------------------------------------------------------------------------------------------------------------|-----------------------|-------------------------|--------------|------|------------|------|-----------|---------------------------------------------------------|--------------|-----------|-------------------|-----|---------|--------------|
| 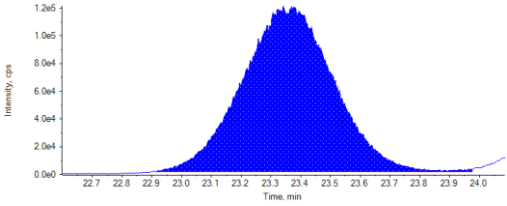 | <table> <tr> <td><b>Compound Name:</b></td><td>F2 (342.000/159.100 Da)</td></tr> <tr> <td>Expected RT:</td><td>23.3</td></tr> <tr> <td>Actual RT:</td><td>23.3</td></tr> <tr> <td>Equation:</td><td>At least 2 points are required to calculate regression.</td></tr> <tr> <td>Area Counts:</td><td>2.57e+006</td></tr> <tr> <td>ISTD Area Counts:</td><td>N/A</td></tr> <tr> <td>Amount:</td><td>0.00 (ng/mL)</td></tr> </table> | <b>Compound Name:</b> | F2 (342.000/159.100 Da) | Expected RT: | 23.3 | Actual RT: | 23.3 | Equation: | At least 2 points are required to calculate regression. | Area Counts: | 2.57e+006 | ISTD Area Counts: | N/A | Amount: | 0.00 (ng/mL) |
| <b>Compound Name:</b>                                                             | F2 (342.000/159.100 Da)                                                                                                                                                                                                                                                                                                                                                                                                           |                       |                         |              |      |            |      |           |                                                         |              |           |                   |     |         |              |
| Expected RT:                                                                      | 23.3                                                                                                                                                                                                                                                                                                                                                                                                                              |                       |                         |              |      |            |      |           |                                                         |              |           |                   |     |         |              |
| Actual RT:                                                                        | 23.3                                                                                                                                                                                                                                                                                                                                                                                                                              |                       |                         |              |      |            |      |           |                                                         |              |           |                   |     |         |              |
| Equation:                                                                         | At least 2 points are required to calculate regression.                                                                                                                                                                                                                                                                                                                                                                           |                       |                         |              |      |            |      |           |                                                         |              |           |                   |     |         |              |
| Area Counts:                                                                      | 2.57e+006                                                                                                                                                                                                                                                                                                                                                                                                                         |                       |                         |              |      |            |      |           |                                                         |              |           |                   |     |         |              |
| ISTD Area Counts:                                                                 | N/A                                                                                                                                                                                                                                                                                                                                                                                                                               |                       |                         |              |      |            |      |           |                                                         |              |           |                   |     |         |              |
| Amount:                                                                           | 0.00 (ng/mL)                                                                                                                                                                                                                                                                                                                                                                                                                      |                       |                         |              |      |            |      |           |                                                         |              |           |                   |     |         |              |
|  | <table> <tr> <td><b>Compound Name:</b></td><td>F3 (342.000/159.100 Da)</td></tr> <tr> <td>Expected RT:</td><td>24.4</td></tr> <tr> <td>Actual RT:</td><td>24.4</td></tr> <tr> <td>Equation:</td><td>At least 2 points are required to calculate regression.</td></tr> <tr> <td>Area Counts:</td><td>1.81e+006</td></tr> <tr> <td>ISTD Area Counts:</td><td>N/A</td></tr> <tr> <td>Amount:</td><td>0.00 (ng/mL)</td></tr> </table> | <b>Compound Name:</b> | F3 (342.000/159.100 Da) | Expected RT: | 24.4 | Actual RT: | 24.4 | Equation: | At least 2 points are required to calculate regression. | Area Counts: | 1.81e+006 | ISTD Area Counts: | N/A | Amount: | 0.00 (ng/mL) |
| <b>Compound Name:</b>                                                             | F3 (342.000/159.100 Da)                                                                                                                                                                                                                                                                                                                                                                                                           |                       |                         |              |      |            |      |           |                                                         |              |           |                   |     |         |              |
| Expected RT:                                                                      | 24.4                                                                                                                                                                                                                                                                                                                                                                                                                              |                       |                         |              |      |            |      |           |                                                         |              |           |                   |     |         |              |
| Actual RT:                                                                        | 24.4                                                                                                                                                                                                                                                                                                                                                                                                                              |                       |                         |              |      |            |      |           |                                                         |              |           |                   |     |         |              |
| Equation:                                                                         | At least 2 points are required to calculate regression.                                                                                                                                                                                                                                                                                                                                                                           |                       |                         |              |      |            |      |           |                                                         |              |           |                   |     |         |              |
| Area Counts:                                                                      | 1.81e+006                                                                                                                                                                                                                                                                                                                                                                                                                         |                       |                         |              |      |            |      |           |                                                         |              |           |                   |     |         |              |
| ISTD Area Counts:                                                                 | N/A                                                                                                                                                                                                                                                                                                                                                                                                                               |                       |                         |              |      |            |      |           |                                                         |              |           |                   |     |         |              |
| Amount:                                                                           | 0.00 (ng/mL)                                                                                                                                                                                                                                                                                                                                                                                                                      |                       |                         |              |      |            |      |           |                                                         |              |           |                   |     |         |              |
|  | <table> <tr> <td><b>Compound Name:</b></td><td>F4 (342.000/159.100 Da)</td></tr> <tr> <td>Expected RT:</td><td>26.0</td></tr> <tr> <td>Actual RT:</td><td>26.0</td></tr> <tr> <td>Equation:</td><td>At least 2 points are required to calculate regression.</td></tr> <tr> <td>Area Counts:</td><td>2.75e+006</td></tr> <tr> <td>ISTD Area Counts:</td><td>N/A</td></tr> <tr> <td>Amount:</td><td>0.00 (ng/mL)</td></tr> </table> | <b>Compound Name:</b> | F4 (342.000/159.100 Da) | Expected RT: | 26.0 | Actual RT: | 26.0 | Equation: | At least 2 points are required to calculate regression. | Area Counts: | 2.75e+006 | ISTD Area Counts: | N/A | Amount: | 0.00 (ng/mL) |
| <b>Compound Name:</b>                                                             | F4 (342.000/159.100 Da)                                                                                                                                                                                                                                                                                                                                                                                                           |                       |                         |              |      |            |      |           |                                                         |              |           |                   |     |         |              |
| Expected RT:                                                                      | 26.0                                                                                                                                                                                                                                                                                                                                                                                                                              |                       |                         |              |      |            |      |           |                                                         |              |           |                   |     |         |              |
| Actual RT:                                                                        | 26.0                                                                                                                                                                                                                                                                                                                                                                                                                              |                       |                         |              |      |            |      |           |                                                         |              |           |                   |     |         |              |
| Equation:                                                                         | At least 2 points are required to calculate regression.                                                                                                                                                                                                                                                                                                                                                                           |                       |                         |              |      |            |      |           |                                                         |              |           |                   |     |         |              |
| Area Counts:                                                                      | 2.75e+006                                                                                                                                                                                                                                                                                                                                                                                                                         |                       |                         |              |      |            |      |           |                                                         |              |           |                   |     |         |              |
| ISTD Area Counts:                                                                 | N/A                                                                                                                                                                                                                                                                                                                                                                                                                               |                       |                         |              |      |            |      |           |                                                         |              |           |                   |     |         |              |
| Amount:                                                                           | 0.00 (ng/mL)                                                                                                                                                                                                                                                                                                                                                                                                                      |                       |                         |              |      |            |      |           |                                                         |              |           |                   |     |         |              |

Figure S34 The LC chromatogram of plums treated with 0.020 a.i. g/L propiconazole were cleaned
